# Supplementary material for: Practical synthesis of unsymmetrical disulfides promoted by bromodimethylsulfonium bromide
Source: Royal Society of Chemistry journal article supplement (doi:10.1039/d2ob02124b), 2022-12-28

## Supporting Information

---

### **Practical synthesis of unsymmetrical disulfides promoted by bromodimethylsulfonium bromide**

Bo Dong<sup>a</sup>, Yifeng Chen<sup>a</sup>, Shubing Xie<sup>c</sup>, Jieying Zhang<sup>a</sup>, Jian Shen<sup>a,b,\*</sup> and Lan-Gui Xie<sup>a,\*</sup>

<sup>a</sup> National and Local Joint Engineering Research Center of Biomedical Functional Materials, School of Chemistry and Materials Science, Nanjing Normal University, Nanjing 210023, China.

<sup>b</sup> Jiangsu Engineering Research Center of Interfacial Chemistry, Nanjing University, Nanjing 210023, China.

<sup>c</sup> Anhui Changjiang Institute of Metrology, Hefei 230088, China.

Email: jshen@njnu.edu.cn

xielg@njnu.edu.cn

# Supporting Information

---

## Table of contents

|                                                                                                         |     |
|---------------------------------------------------------------------------------------------------------|-----|
| 1 General Information .....                                                                             | S3  |
| 2 Experimental Procedures.....                                                                          | S3  |
| Preparation of (Bromodimethyl)sulfonium bromide (BDMS) .....                                            | S3  |
| Preparation of 2-(diethoxymethyl)thiirane (39).....                                                     | S3  |
| Preparation of (1 <i>S</i> ,4 <i>R</i> )-1-(mercaptomethyl)-7,7-dimethylbicyclo[2.2.1]heptan-2-one..... | S4  |
| Preparation of <i>tert</i> -butyl 2-((2-mercaptoethyl)carbamoyl)pyrrolidine-1-carboxylate.....          | S4  |
| General procedure for the synthesis of unsymmetrical disulfides .....                                   | S5  |
| Procedure for multi-gram scale synthesis .....                                                          | S5  |
| 3 Characterization of products.....                                                                     | S6  |
| 4 References .....                                                                                      | S23 |
| 5 NMR spectra.....                                                                                      | S25 |

# Supporting Information

## 1 General Information

All reactions involving air or moisture sensitive reagents were carried out in flame-dried glassware under argon atmosphere using standard Schlenk techniques. Solvents were either freshly distilled or obtained in extra-dry grade from commercial sources, and store over molecular sieve (3 Å). Dichloromethane (CH<sub>2</sub>Cl<sub>2</sub>), N,N-Dimethylformamide (DMF) and Acetonitrile (MeCN) was refluxed over CaH<sub>2</sub> and used as freshly distilled. Tetrahydrofuran (THF) (extra dry over molecular sieves) was purchased commercially and used directly. Otherwise noted, commercially available chemicals were purchased from Energy Chemical. Column chromatography was performed with silica gel (300–400 mesh). Column chromatography was performed with silica gel (300–400 mesh). Merck silica gel 60 F254 plates were used for thin layer chromatography (TLC) with UV light (254/366 nm) or KMnO<sub>4</sub> as stains. The NMR spectra were recorded on a Bruker Avance 400 spectrometer at 400 MHz (<sup>1</sup>H), 101 MHz (<sup>13</sup>C) and 376 MHz (<sup>19</sup>F) in CDCl<sub>3</sub> with tetramethylsilane as the internal standard. Chemical shifts (δ) were reported in parts per million (ppm). Splitting patterns were designated as s, singlet; d, doublet; t, triplet; q, quartet; dd, doublet of doublets; m, multiplet. HR-ESI-MS was recorded on a Bruker MTQ III q-TOF instrument.

## 2 Experimental Procedures

### Preparation of (Bromodimethyl)sulfonium bromide (BDMS)

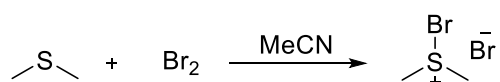

Dimethyl sulfide (12.4 g, 200 mmol, 1 equiv) were diluted in 40 mL dry acetonitrile (MeCN) in a dry 250 mL flask. A solution of bromine (10.3 mL, 200 mmol, 1 equiv) in 40 mL MeCN was added dropwise over 15 min at room temperature. The resulting orange powder was washed with hexane (10 mL X 3) and dried in vacuo (40.3 g, 180 mmol, 92%).

### Preparation of 2-(diethoxymethyl)thiirane (39)

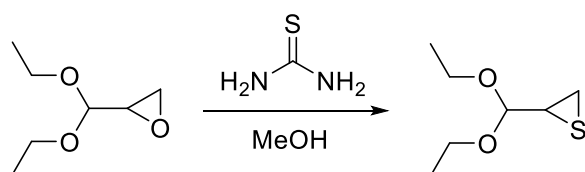

To a flask containing 10 mL of anhydrous methanol were added thiourea (0.3 g, 4 mmol,

## Supporting Information

1 equiv) and 2-(diethoxymethyl)oxirane (0.6 g, 4 mmol, 1 equiv). The mixture was stirred at 23 °C under N<sub>2</sub> for 3 days.<sup>11</sup> The methanol was removed under reduced pressure. The residue was purified by flash column chromatography on silica gel (EtOAc/petroleum ether 1:100), the title compound was obtained as a colorless oil (394 mg, 61% yield). <sup>1</sup>H NMR (400 MHz, Chloroform-*d*) δ 4.08 (d, *J* = 6.0 Hz, 1H), 3.76–3.66 (m, 2H), 3.63–3.52 (m, 2H), 3.10–3.05 (m, 1H), 2.45 (dd, *J* = 6.4, 1.6 Hz, 1H), 2.29 (dd, *J* = 5.2, 1.2 Hz, 1H), 1.21 (q, *J* = 7.2 Hz, 6H). <sup>13</sup>C NMR (101 MHz, CDCl<sub>3</sub>) δ 105.3, 62.3, 34.3, 21.1, 15.2.

### Preparation of (1*S*,4*R*)-1-(mercaptomethyl)-7,7-dimethylbicyclo[2.2.1]heptan-2-one

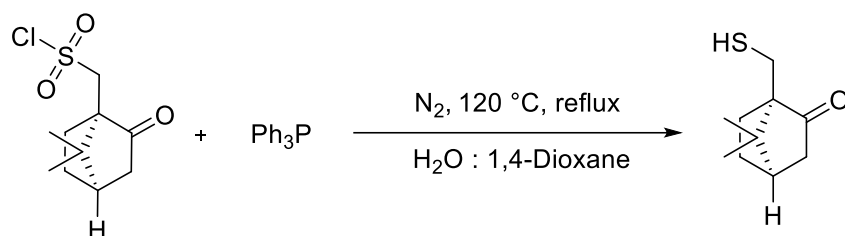

To a flask containing 5 mL of H<sub>2</sub>O:1,4-dioxane (1:4) were added ((1*S*,4*R*)-7,7-dimethyl-2-oxobicyclo[2.2.1]heptan-1-yl)methanesulfonyl chloride (0.5 g, 2 mmol, 1 equiv) and triphenylphosphine (1.6 g, 6 mmol, 3 equiv). The mixture was refluxed at 120 °C under N<sub>2</sub> for 2 h.<sup>12</sup> After the extraction with EtOAc (10 mL X 3), the combined organic layers were washed with brine, dried over Na<sub>2</sub>SO<sub>4</sub>, filtrated and concentrated under reduced pressure. After purification by column chromatography on silica gel (EtOAc/petroleum ether 1:100), the title compound was obtained as a white solid (737 mg, 67% yield). <sup>1</sup>H NMR (400 MHz, Chloroform-*d*) δ 2.84 (q, *J* = 6.8 Hz, 1H), 2.37–2.31 (m, 2H), 2.06 (t, *J* = 4.0 Hz, 1H), 2.00–1.83 (m, 4H), 1.71–1.65 (m, 1H), 1.40–1.26 (m, 1H), 1.00 (s, 3H), 0.88 (s, 3H). <sup>13</sup>C NMR (101 MHz, CDCl<sub>3</sub>) δ 217.8, 60.6, 47.8, 43.6, 43.2, 27.0, 26.6, 21.3, 20.2, 19.8.

### Preparation of *tert*-butyl 2-((2-mercaptoethyl)carbonyl)pyrrolidine-1-carboxylate

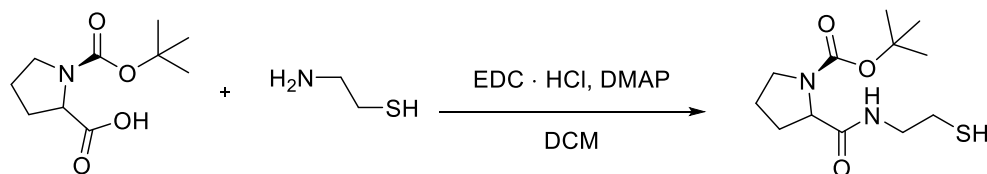

To a flask containing 20 mL of DCM were added *N*-(3-dimethylaminopropyl)-*N'*-ethylcarbodiimide hydrochloride (1.25 g, 6.5 mmol, 1.3 equiv), 4-dimethylaminopyridine (6 mg, 0.5 mmol, 0.1 equiv), Boc-L-proline (1.30 g, 6 mmol,

## Supporting Information

1.2 equiv) and 2-aminoethanethiol (0.39 g, 5 mmol, 1 equiv). The mixture was stirred for 12 h at 23 °C. After the extraction with EtOAc (10 mL X 3), the combined organic layer was washed with brine, dried over Na<sub>2</sub>SO<sub>4</sub>, filtrated and concentrated under reduced pressure. After purification by column chromatography on silica gel (EtOAc/petroleum ether 1:1), the title compound was obtained as a white solid (767 mg, 56% yield). <sup>1</sup>H NMR (400 MHz, Chloroform-*d*) δ 7.15–6.39 (m, 1H), 4.42–4.08 (m, 1H), 3.54–3.23 (m, 4H), 2.96–2.60 (m, 1H), 2.28–1.70 (m, 5H), 1.53–1.33 (m, 10H). <sup>13</sup>C NMR (101 MHz, CDCl<sub>3</sub>) δ 202.4, 153.7, 80.4, 66.1, 46.5, 42.1, 31.5, 28.3, 24.5. HRMS (ESI) *m/z*: [M + H]<sup>+</sup> Calcd for C<sub>12</sub>H<sub>23</sub>N<sub>2</sub>O<sub>3</sub>S 275.1424; Found 275.1422.

### General procedure for the synthesis of unsymmetrical disulfides

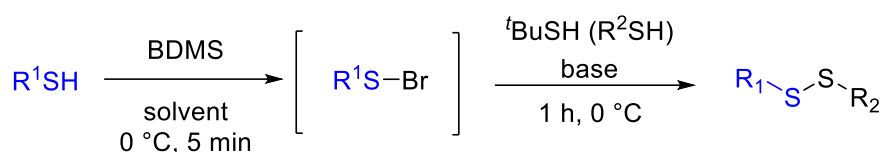

A dry flask, charged with BDMS (100 mg, 0.45 mmol, 1.5 equiv) and R<sup>1</sup>SH (0.45 mmol, 1.5 equiv), was vacuumed and refilled with nitrogen (3 cycles). Dry DMF (3 mL) were injected to the flask at 0 °C with an ice bath. After a stirring of 5 min, K<sub>2</sub>CO<sub>3</sub> (62 mg, 0.45 mmol, 1.5 equiv) (Et<sub>3</sub>N in the case of compound **8**) and corresponding R<sup>2</sup>SH (0.3 mmol, 1.0 equiv) were added to the flask. The reaction mixture was then stirred at 0 °C for 1 h, before quenching with H<sub>2</sub>O. After the extraction with Et<sub>2</sub>O (10 mL X 3), the combined organic layer was washed with brine, dried over Na<sub>2</sub>SO<sub>4</sub>, filtrated and concentrated under reduced pressure. The crude product was then purified by column chromatography on silica gel using petroleum ether and ethyl acetate as the eluent.

### Procedure for multi-gram scale synthesis

A dry flask charged with BDMS (3.33 g, 15 mmol, 1.5 equiv) was vacuumed and refilled with nitrogen (3 cycles). Dry DMF (60 mL) were injected to the flask at 0 °C with an ice bath and R<sup>1</sup>SH (15 mmol, 1.5 equiv) dissolved in DMF (20 mL) were injected to the flask. After a stirring of 5 min, K<sub>2</sub>CO<sub>3</sub> (2.07 g, 15 mmol, 1.5 equiv) (Et<sub>3</sub>N in the case of compound **8**) and the corresponding R<sup>2</sup>SH (10 mmol, 1.0 equiv) dissolved in DMF (20 mL) were added to the flask. The reaction mixture was then stirred at 0 °C for 1 h, before quenching with H<sub>2</sub>O. After the extraction with Et<sub>2</sub>O (20 mL X 3), the combined organic layer was washed with brine, dried over Na<sub>2</sub>SO<sub>4</sub>, filtrated and concentrated under reduced pressure. The crude product was then purified by column chromatography on silica gel using petroleum ether and ethyl acetate as the eluent.

## Supporting Information

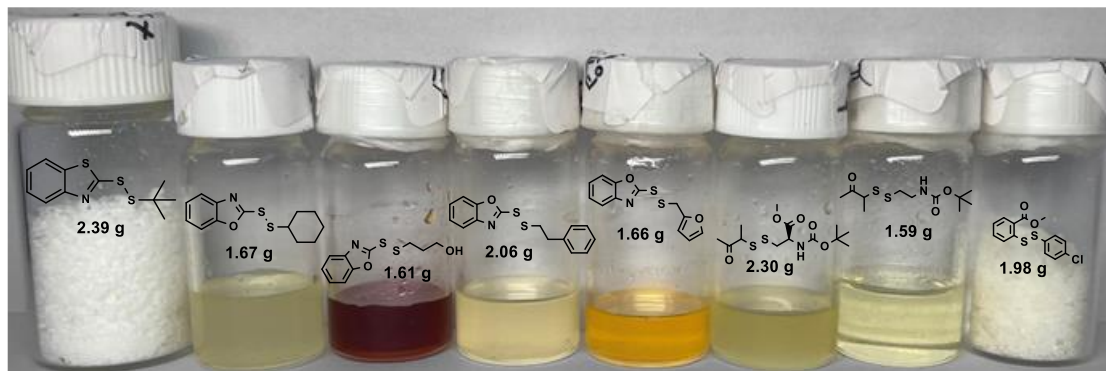

Figure S1. Picture of the isolated disulfides

### 3 Characterization of products

#### 2-(*tert*-Butyldisulfanyl)benzo[*d*]oxazole (1)<sup>1</sup>

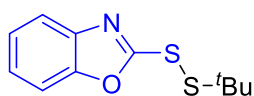

According to the general procedure for the synthesis of unsymmetrical disulfides, benzo[*d*]oxazole-2-thiol (67 mg, 0.45 mmol, 1.5 equiv) and *tert*-butylthiol (27 mg, 0.3 mmol, 1.0 equiv) were applied. After purification by column chromatography on silica gel (EtOAc/petroleum ether 1:20), the title compound was obtained as a colorless oil (71 mg, 99%). <sup>1</sup>H NMR (400 MHz, CDCl<sub>3</sub>) δ 7.66–7.63 (m, 1H), 7.49–7.46 (m, 1H), 7.32–7.27 (m, 2H), 1.40 (s, 9H). <sup>13</sup>C NMR (101 MHz, CDCl<sub>3</sub>) δ 163.8, 152.1, 142.0, 124.6, 124.5, 119.3, 110.2, 49.5, 29.5.

#### 2-(Naphthalen-2-ylthio)benzo[*d*]oxazole (2)

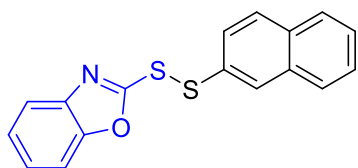

According to the general procedure for the synthesis of unsymmetrical disulfides, benzo[*d*]oxazole-2-thiol (67 mg, 0.45 mmol, 1.5 equiv) and naphthalene-2-thiol (48 mg, 0.3 mmol, 1.0 equiv) were applied. After purification by column chromatography on silica gel (EtOAc/petroleum ether 1:50), the title compound was obtained as a light yellow solid (61 mg, 66%). <sup>1</sup>H NMR (400 MHz, CDCl<sub>3</sub>) δ 8.17 (d, *J* = 1.6 Hz, 1H), 7.85–7.79 (m, 3H), 7.77–7.75 (m, 1H), 7.72–7.70 (m, 1H), 7.53–7.48 (m, 3H), 7.35–7.29 (m, 2H). <sup>13</sup>C NMR (101 MHz, CDCl<sub>3</sub>) δ 162.7, 152.5, 141.9, 133.3, 133.0, 132.3, 129.7, 129.3, 127.8, 127.2, 127.0, 126.9, 124.9, 124.7, 119.5, 110.4. HRMS (ESI) *m/z*: [M + H]<sup>+</sup> Calcd for C<sub>17</sub>H<sub>12</sub>NOS<sub>2</sub> 310.0355 Found 310.0354.

## Supporting Information

### 2-((2,4-Dimethylphenyl)disulfanyl)benzo[d]oxazole (3)

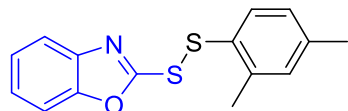

According to the general procedure for the synthesis of unsymmetrical disulfides, benzo[d]oxazole-2-thiol (67 mg, 0.45 mmol, 1.5 equiv) and 2,4-dimethylbenzenethiol (42 mg, 0.3 mmol, 1.0 equiv) were applied. After purification by column chromatography on silica gel (EtOAc/petroleum ether 1:50), the title compound was obtained as a yellow oil (68 mg, 79%). <sup>1</sup>H NMR (400 MHz, CDCl<sub>3</sub>) δ 7.70–7.66 (m, 2H), 7.52–7.47 (m, 1H), 7.34–7.28 (m, 2H), 7.005–6.98 (m, 2H), 2.51 (s, 3H), 2.30 (s, 3H). <sup>13</sup>C NMR (101 MHz, CDCl<sub>3</sub>) δ 162.9, 152.3, 142.0, 140.0, 139.9, 133.1, 131.5, 130.4, 127.7, 124.7, 124.5, 119.4, 110.2, 21.1, 20.4. HRMS (ESI) m/z: [M + H]<sup>+</sup> Calcd for C<sub>15</sub>H<sub>14</sub>NOS<sub>2</sub> 288.0511; Found 288.0510.

### 2-((4-Methoxyphenyl)disulfanyl)benzo[d]oxazole (4)<sup>2</sup>

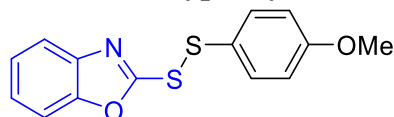

According to the general procedure for the synthesis of unsymmetrical disulfides, benzo[d]oxazole-2-thiol (67 mg, 0.45 mmol, 1.5 equiv) and 4-methoxybenzenethiol (43 mg, 0.3 mmol, 1.0 equiv) were applied. After purification by column chromatography on silica gel (EtOAc/petroleum ether 1:20), the title compound was obtained as a yellow oil (73 mg, 84%). <sup>1</sup>H NMR (400 MHz, CDCl<sub>3</sub>) δ 7.71–7.67 (m, 3H), 7.51–7.48 (m, 1H), 7.34–7.27 (m, 2H), 6.87–6.84 (m, 2H), 3.78 (s, 3H). <sup>13</sup>C NMR (101 MHz, CDCl<sub>3</sub>) δ 163.4, 161.0, 152.5, 142.0, 134.8, 125.9, 124.8, 124.6, 119.5, 114.9, 110.3, 55.4.

### 2-((4-Methoxyphenyl)disulfanyl)benzo[d]thiazole (5)<sup>2</sup>

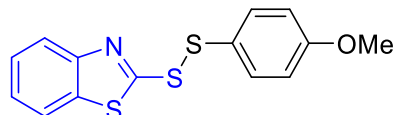

According to the general procedure for the synthesis of unsymmetrical disulfides, benzo[d]thiazole-2-thiol (75 mg, 0.45 mmol, 1.5 equiv) and 4-methoxybenzenethiol (43 mg, 0.3 mmol, 1.0 equiv) were applied. After purification by column chromatography on silica gel (EtOAc/petroleum ether 1:20), the title compound was obtained as a white solid (67 mg, 73%). <sup>1</sup>H NMR (400 MHz, CDCl<sub>3</sub>) δ 7.88–7.86 (m, 1H), 7.82–7.80 (m, 1H), 7.65–7.61 (m, 2H), 7.45–7.41 (m, 1H), 7.35–7.31 (m, 1H), 6.88–6.84 (m, 2H), 3.79 (s, 3H). <sup>13</sup>C NMR (101 MHz, CDCl<sub>3</sub>) δ 172.0, 160.7, 154.9, 135.8, 133.3, 126.2, 125.7, 124.6, 122.2, 121.1, 114.9, 55.4.

## Supporting Information

### 2-(Thiophen-2-ylidisulfanyl)benzo[d]oxazole (6)

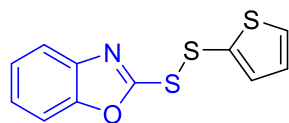

According to the general procedure for the synthesis of unsymmetrical disulfides, benzo[d]oxazole-2-thiol (67 mg, 0.45 mmol, 1.5 equiv) and thiophene-2-thiol (35 mg, 0.3 mmol, 1.0 equiv) were applied. After purification by column chromatography on silica gel (EtOAc/petroleum ether 1:50), the title compound was obtained as a yellow oil (40 mg, 50%). <sup>1</sup>H NMR (400 MHz, CDCl<sub>3</sub>) δ 7.74–7.70 (m, 1H), 7.57–7.44 (m, 3H), 7.36–7.32 (m, 2H), 7.04–6.99 (m, 1H). <sup>13</sup>C NMR (101 MHz, CDCl<sub>3</sub>) δ 162.6, 152.5, 142.0, 137.3, 133.2, 133.1, 127.8, 124.9, 124.7, 119.6, 110.3. HRMS (ESI) m/z: [M + H]<sup>+</sup> Calcd for C<sub>11</sub>H<sub>8</sub>NOS<sub>3</sub> 265.9763; Found 265.9762.

### 4-((4-Chlorophenyl)disulfanyl)phenol (7)

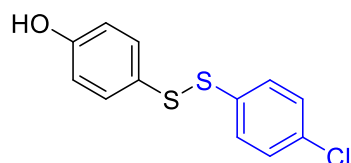

According to the general procedure for the synthesis of unsymmetrical disulfides, 4-chlorobenzenethiol (65 mg, 0.45 mmol, 1.5 equiv) and 4-mercaptophenol (38 mg, 0.3 mmol, 1.0 equiv) were applied. After purification by column chromatography on silica gel (EtOAc/petroleum ether 1:10), the title compound was obtained as a yellow oil (62 mg, 65%). <sup>1</sup>H NMR (400 MHz, CDCl<sub>3</sub>) δ 7.44–7.41 (m, 2H), 7.38–7.34 (m, 2H), 7.29–7.26 (m, 2H), 6.79–6.74 (m, 2H), 5.21 (s, 1H). <sup>13</sup>C NMR (101 MHz, CDCl<sub>3</sub>) δ 155.9, 135.9, 133.3, 132.2, 129.7, 129.1, 127.8, 116.2. HRMS (ESI) m/z: [M - H]<sup>+</sup> Calcd for C<sub>12</sub>H<sub>8</sub>ClOS<sub>2</sub> 266.9705; Found 266.9709.

### Methyl 2-((4-chlorophenyl)disulfanyl)benzoate (8)

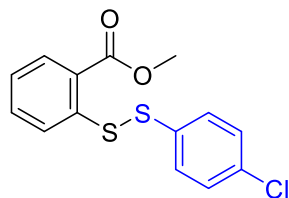

A dry flask, charged with BDMS (100 mg, 0.45 mmol, 1.5 equiv) and 4-chlorobenzenethiol (65 mg, 0.45 mmol, 1.5 equiv), was vacuumed and refilled with nitrogen (3 cycles). Dry DCM (3 mL) were injected to the flask at 0 °C with an ice bath. After a stirring of 5 min, Et<sub>3</sub>N (46 mg, 0.45 mmol, 1.5 equiv) and corresponding 2-mercaptobenzoate (51 mg, 0.3 mmol, 1.0 equiv) were added to the flask. The reaction mixture was then stirred at 0 °C for 1 h, before quenching with H<sub>2</sub>O. After the extraction



## Supporting Information

with Et<sub>2</sub>O (10 mL X 3), the combined organic layer was washed with brine, dried over Na<sub>2</sub>SO<sub>4</sub>, filtrated and concentrated under reduced pressure. After purification by column chromatography on silica gel (EtOAc/petroleum ether 1:10), the title compound was obtained as a white solid (73 mg, 78%). <sup>1</sup>H NMR (400 MHz, CDCl<sub>3</sub>) δ 8.06–8.03 (m, 1H), 7.99–7.93 (m, 1H), 7.51–7.47 (m, 1H), 7.41–7.37 (m, 2H), 7.27–7.21 (m, 3H), 3.96 (s, 3H). <sup>13</sup>C NMR (101 MHz, CDCl<sub>3</sub>) δ 166.7, 140.7, 134.6, 133.1, 132.8, 131.4, 129.1, 128.3, 126.9, 125.6, 125.5, 52.4. HRMS (ESI) m/z: [M + H]<sup>+</sup> Calcd for C<sub>14</sub>H<sub>12</sub>ClO<sub>2</sub>S<sub>2</sub> 310.9962; Found 310.9961.

### 2-(Butyldisulfanyl)benzo[d]oxazole (9)<sup>2</sup>

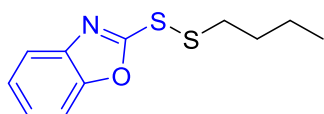

According to the general procedure for the synthesis of unsymmetrical disulfides, benzo[d]oxazole-2-thiol (67 mg, 0.45 mmol, 1.5 equiv) and butane-1-thiol (28 mg, 0.3 mmol, 1.0 equiv) were applied. After purification by column chromatography on silica gel (EtOAc/petroleum ether 1:50), the title compound was obtained as a colorless oil (66 mg, 92%). <sup>1</sup>H NMR (400 MHz, CDCl<sub>3</sub>) δ 7.69–7.64 (m, 1H), 7.50–7.45 (m, 1H), 7.32–7.26 (m, 2H), 2.98 (t, *J* = 7.6 Hz, 2H), 1.77–1.70 (m, 2H), 1.49–1.39 (m, 2H), 0.91 (t, *J* = 7.2 Hz, 3H). <sup>13</sup>C NMR (101 MHz, CDCl<sub>3</sub>) δ 163.6, 152.3, 141.9, 124.6, 124.5, 119.3, 110.2, 39.0, 30.6, 21.4, 13.5.

### 2-(*tert*-Butyldisulfanyl)benzo[d]thiazole (10)<sup>3</sup>

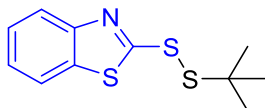

According to the general procedure for the synthesis of unsymmetrical disulfides, benzo[d]thiazole-2-thiol (75 mg, 0.45 mmol, 1.5 equiv) and *tert*-butylthiol (27 mg, 0.3 mmol, 1.0 equiv) were applied. After purification by column chromatography on silica gel (EtOAc/petroleum ether 1:20), the title compound was obtained as a white solid (64 mg, 93%). <sup>1</sup>H NMR (400 MHz, CDCl<sub>3</sub>) δ 7.86 (d, *J* = 22.4 Hz, 1H), 7.76 (d, *J* = 9.2 Hz, 1H), 7.43–7.39 (m, 1H), 7.32–7.28 (m, 1H), 1.41 (s, 9H). <sup>13</sup>C NMR (101 MHz, CDCl<sub>3</sub>) δ 174.3, 154.7, 135.6, 126.1, 124.4, 121.9, 121.0, 50.2, 29.7.

### 2-(Cyclohexyldisulfanyl)benzo[d]oxazole (11)<sup>4</sup>

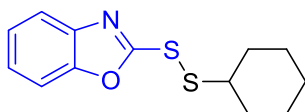

According to the general procedure for the synthesis of unsymmetrical disulfides, benzo[d]oxazole-2-thiol (67 mg, 0.45 mmol, 1.5 equiv) and cyclohexanethiol (35 mg, 0.3 mmol, 1.0 equiv) were applied. After purification by column chromatography on

## Supporting Information

silica gel (EtOAc/petroleum ether 1:50), the title compound was obtained as a yellow oil (66 mg, 83%).  $^1\text{H}$  NMR (400 MHz,  $\text{CDCl}_3$ )  $\delta$  7.68–7.64 (m, 1H), 7.50–7.45 (m, 1H), 7.32–7.25 (m, 2H), 3.10–3.03 (m, 1H), 2.12–2.07 (m, 2H), 1.81–1.76 (m, 2H), 1.63–1.58 (m, 1H), 1.48–1.39 (m, 2H), 1.36–1.19 (m, 3H).  $^{13}\text{C}$  NMR (101 MHz,  $\text{CDCl}_3$ )  $\delta$  163.9, 152.2, 141.9, 124.5, 124.4, 119.2, 110.1, 49.9, 32.2, 25.8, 25.3.

### 2-((Adamantan-1-yl)disulfanyl)benzo[*d*]oxazole (12)

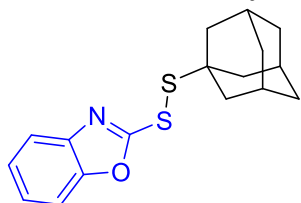

According to the general procedure for the synthesis of unsymmetrical disulfides, benzo[*d*]oxazole-2-thiol (67 mg, 0.45 mmol, 1.5 equiv) and adamantane-1-thiol (53 mg, 0.3 mmol, 1.0 equiv) were applied. After purification by column chromatography on silica gel (EtOAc/petroleum ether 1:50), the title compound was obtained as a colorless oil (92 mg, 96%).  $^1\text{H}$  NMR (400 MHz,  $\text{CDCl}_3$ )  $\delta$  7.66–7.62 (m, 1H), 7.49–7.45 (m, 1H), 7.30–7.24 (m, 2H), 2.07–2.04 (m, 3H), 1.94–1.91 (m, 6H), 1.67–1.61 (m, 6H).  $^{13}\text{C}$  NMR (101 MHz,  $\text{CDCl}_3$ )  $\delta$  164.2, 152.1, 142.0, 124.4 (2), 119.1, 110.1, 51.0, 41.9, 35.7, 29.8. HRMS (ESI)  $m/z$ :  $[\text{M} + \text{H}]^+$  Calcd for  $\text{C}_{17}\text{H}_{20}\text{NOS}_2$  318.0981; Found 318.0981.

### 2-(Phenethylsulfanyl)benzo[*d*]oxazole (13)

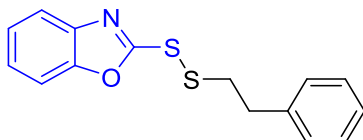

According to the general procedure for the synthesis of unsymmetrical disulfides, benzo[*d*]oxazole-2-thiol (67 mg, 0.45 mmol, 1.5 equiv) and 2-phenylethane-1-thiol (42 mg, 0.3 mmol, 1.0 equiv) were applied. After purification by column chromatography on silica gel (EtOAc/petroleum ether 1:50), the title compound was obtained as a yellow oil (81 mg, 94%).  $^1\text{H}$  NMR (400 MHz,  $\text{CDCl}_3$ )  $\delta$  7.73–7.69 (m, 1H), 7.53–7.48 (m, 1H), 7.36–7.29 (m, 4H), 7.26–7.20 (m, 3H), 3.29–3.24 (m, 2H), 3.13–3.09 (m, 2H).  $^{13}\text{C}$  NMR (101 MHz,  $\text{CDCl}_3$ )  $\delta$  163.3, 152.3, 141.8, 139.1, 128.5 (2C), 126.5, 124.7, 124.6, 119.3, 110.2, 40.3, 35.0. HRMS (ESI)  $m/z$ :  $[\text{M} + \text{H}]^+$  Calcd for  $\text{C}_{15}\text{H}_{14}\text{NOS}_2$  288.0511; Found 288.0510.

### 2-(Benzylsulfanyl)benzo[*d*]oxazole (14)<sup>5</sup>

## Supporting Information

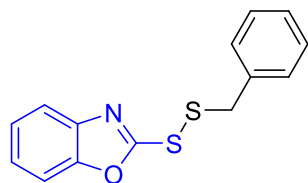

According to the general procedure for the synthesis of unsymmetrical disulfides, benzo[*d*]oxazole-2-thiol (67 mg, 0.45 mmol, 1.5 equiv) and phenylmethanethiol (37 mg, 0.3 mmol, 1.0 equiv) were applied. After purification by column chromatography on silica gel (EtOAc/petroleum ether 1:50), the title compound was obtained as a colorless oil (73 mg, 88%). <sup>1</sup>H NMR (400 MHz, CDCl<sub>3</sub>) δ 7.70–7.65 (m, 1H), 7.48–7.44 (m, 1H), 7.37–7.19 (m, 7H), 4.22 (s, 2H). <sup>13</sup>C NMR (101 MHz, CDCl<sub>3</sub>) δ 163.0, 152.2, 141.8, 135.5, 129.5, 128.5, 127.8, 124.7, 124.5, 119.3, 110.2, 43.6.

### 2-((4-Chlorobenzyl)disulfanyl)benzo[*d*]oxazole (15)

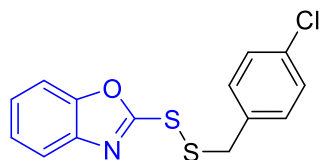

According to the general procedure for the synthesis of unsymmetrical disulfides, benzo[*d*]oxazole-2-thiol (67 mg, 0.45 mmol, 1.5 equiv) and (4-chlorophenyl)methanethiol (37 mg, 0.3 mmol, 1.0 equiv) were applied. After purification by column chromatography on silica gel (EtOAc/petroleum ether 1:20), the title compound was obtained as a colorless oil (57 mg, 62%). <sup>1</sup>H NMR (400 MHz, CDCl<sub>3</sub>) δ 7.69–7.64 (m, 1H), 7.47–7.43 (m, 1H), 7.34–7.30 (m, 2H), 7.27–7.21 (m, 4H), 4.16 (s, 2H). <sup>13</sup>C NMR (101 MHz, CDCl<sub>3</sub>) δ 162.6, 152.2, 141.7, 134.1, 133.8, 130.8, 128.7, 124.9, 124.6, 119.3, 110.2, 42.7. HRMS (ESI) *m/z*: [M + H]<sup>+</sup> Calcd for C<sub>14</sub>H<sub>11</sub>ClNOS<sub>2</sub> 307.9965; Found 307.9965.

### 2-((Furan-2-ylmethyl)disulfanyl)benzo[*d*]oxazole (16)

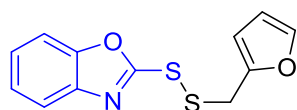

According to the general procedure for the synthesis of unsymmetrical disulfides, benzo[*d*]oxazole-2-thiol (67 mg, 0.45 mmol, 1.5 equiv) and furan-2-ylmethanethiol (35 mg, 0.3 mmol, 1.0 equiv) were applied. After purification by column chromatography on silica gel (EtOAc/petroleum ether 1:20), the title compound was obtained as an orange oil (62 mg, 79%). <sup>1</sup>H NMR (400 MHz, CDCl<sub>3</sub>) δ 7.67–7.63 (m, 1H), 7.48–7.43 (m, 1H), 7.32–7.26 (m, 3H), 6.30–6.26 (m, 1H), 6.21–6.17 (m, 1H), 4.21 (s, 2H). <sup>13</sup>C NMR (101 MHz, CDCl<sub>3</sub>) δ 162.8, 152.3, 148.5, 143.0, 141.8, 124.6, 124.5, 119.2, 110.5, 110.1, 109.9, 35.8. HRMS (ESI) *m/z*: [M + H]<sup>+</sup> Calcd for C<sub>12</sub>H<sub>10</sub>NO<sub>2</sub>S<sub>2</sub> 264.0147; Found 264.0147.

## Supporting Information

### Methyl 3-(benzo[*d*]oxazol-2-yl)disulfanylpropanoate (17)

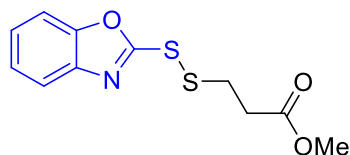

According to the general procedure for the synthesis of unsymmetrical disulfides, benzo[*d*]oxazole-2-thiol (67 mg, 0.45 mmol, 1.5 equiv) and methyl 3-mercaptoopropanoate (37 mg, 0.3 mmol, 1.0 equiv) were applied. After purification by column chromatography on silica gel (EtOAc/petroleum ether 1:20), the title compound was obtained as a yellow oil (66 mg, 83%). <sup>1</sup>H NMR (400 MHz, CDCl<sub>3</sub>) δ 7.69–7.62 (m, 1H), 7.50–7.46 (m, 1H), 7.33–7.27 (m, 2H), 3.67 (s, 3H), 3.23 (t, *J* = 7.2 Hz, 2H), 2.85 (t, *J* = 7.2 Hz, 2H). <sup>13</sup>C NMR (101 MHz, CDCl<sub>3</sub>) δ 171.6, 162.8, 152.3, 141.7, 124.8, 124.6, 119.3, 110.2, 51.9, 33.9, 33.4. HRMS (ESI) *m/z*: [M + H]<sup>+</sup> Calcd for C<sub>11</sub>H<sub>12</sub>NO<sub>3</sub>S<sub>2</sub> 270.0253; Found 270.0254.

### 2-Ethylhexyl 2-((4-fluorophenyl)disulfanyl)acetate (18)

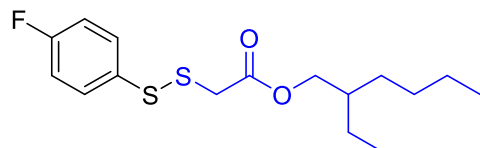

According to the general procedure for the synthesis of unsymmetrical disulfides, 2-ethylhexyl 2-mercaptoacetate (92 mg, 0.45 mmol, 1.5 equiv) and 4-fluorobenzenethiol (39 mg, 0.3 mmol, 1.0 equiv) were applied. After purification by column chromatography on silica gel (EtOAc/petroleum ether 1:50), the title compound was obtained as a colorless oil (53 mg, 54%). <sup>1</sup>H NMR (400 MHz, CDCl<sub>3</sub>) δ 7.56–7.51 (m, 2H), 7.06–7.00 (m, 2H), 3.98–3.93 (m, 2H), 3.49 (s, 2H), 1.58–1.48 (m, 1H), 1.37–1.26 (m, 8H), 0.91–0.85 (m, 6H). <sup>13</sup>C NMR (101 MHz, CDCl<sub>3</sub>) δ 169.0, 162.6 (d, *J*<sub>C-F</sub> = 249.0 Hz), 131.7 (d, *J*<sub>C-F</sub> = 8.1 Hz), 131.4 (d, *J*<sub>C-F</sub> = 3.4 Hz), 116.2 (d, *J*<sub>C-F</sub> = 22.2 Hz), 68.0, 40.8, 38.6, 30.2, 28.8, 23.6, 22.9, 14.0, 10.9. <sup>19</sup>F NMR (376 MHz, CDCl<sub>3</sub>) δ -113.5. HRMS (ESI) *m/z*: [M + H]<sup>+</sup> Calcd for C<sub>16</sub>H<sub>24</sub>FO<sub>2</sub>S<sub>2</sub> 331.1196; Found 331.1193.

### 3-(Benzo[*d*]oxazol-2-yl)disulfanylpropan-1-ol (19)<sup>6</sup>

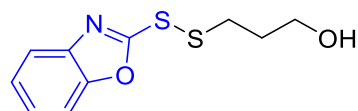

According to the general procedure for the synthesis of unsymmetrical disulfides, benzo[*d*]oxazole-2-thiol (67 mg, 0.45 mmol, 1.5 equiv) and methyl 3-mercaptoopropan-1-ol (28 mg, 0.3 mmol, 1.0 equiv) were applied. After purification by column chromatography on silica gel (EtOAc/petroleum ether 1:2), the title compound was obtained as a rufous oil (58 mg, 80%). <sup>1</sup>H NMR (400 MHz, CDCl<sub>3</sub>) δ 7.67–7.63 (m, 1H), 7.49–7.44 (m, 1H), 7.33–7.26 (m, 2H), 3.82 (t, *J* = 6.0 Hz, 2H), 3.15 (t, *J* = 6.8

## Supporting Information

Hz, 2H), 2.03–1.96 (m, 2H).  $^{13}\text{C}$  NMR (101 MHz,  $\text{CDCl}_3$ )  $\delta$  164.0, 152.3, 141.4, 124.8, 124.7, 119.1, 110.2, 60.2, 36.0, 31.0.

### 2-(Allyldisulfanyl)benzo[*d*]oxazole (20)

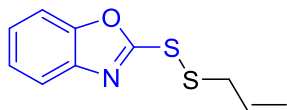

According to the general procedure for the synthesis of unsymmetrical disulfides, benzo[*d*]oxazole-2-thiol (67 mg, 0.45 mmol, 1.5 equiv) and prop-2-ene-1-thiol (22 mg, 0.3 mmol, 1.0 equiv) were applied. After purification by column chromatography on silica gel (EtOAc/petroleum ether 1:50), the title compound was obtained as a colorless oil (34 mg, 50%).  $^1\text{H}$  NMR (400 MHz,  $\text{CDCl}_3$ )  $\delta$  7.70–7.66 (m, 1H), 7.53–7.47 (m, 1H), 7.34–7.28 (m, 2H), 5.92–5.82 (m, 1H), 5.24–5.17 (m, 2H), 3.62 (d,  $J = 7.6$  Hz, 2H).  $^{13}\text{C}$  NMR (101 MHz,  $\text{CDCl}_3$ )  $\delta$  163.4, 152.3, 141.8, 131.4, 124.7, 124.6, 120.2, 119.3, 110.2, 42.0. HRMS (ESI)  $m/z$ :  $[\text{M} + \text{H}]^+$  Calcd for  $\text{C}_{10}\text{H}_{10}\text{NOS}_2$  224.0198; Found 224.0198.

### *tert*-Butyl (2-(benzo[*d*]oxazol-2-yl)disulfanyl)ethyl)carbamate (21)

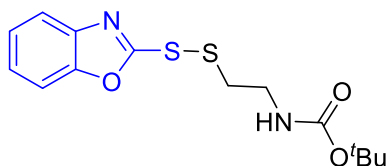

According to the general procedure for the synthesis of unsymmetrical disulfides, benzo[*d*]oxazole-2-thiol (67 mg, 0.45 mmol, 1.5 equiv) and *tert*-butyl (2-mercaptoethyl)carbamate (53 mg, 0.3 mmol, 1.0 equiv) were applied. After purification by column chromatography on silica gel (EtOAc/petroleum ether 1:20), the title compound was obtained as a colorless oil (66 mg, 57%).  $^1\text{H}$  NMR (400 MHz,  $\text{CDCl}_3$ )  $\delta$  7.67–7.65 (m, 1H), 7.49–7.46 (m, 1H), 7.34–7.28 (m, 2H), 6.03 (s, 1H), 3.53–3.47 (m, 2H), 3.08 (t,  $J = 5.6$  Hz, 2H), 1.44 (s, 9H).  $^{13}\text{C}$  NMR (101 MHz,  $\text{CDCl}_3$ )  $\delta$  164.3, 155.9, 152.6, 141.4, 124.8, 124.7, 119.2, 110.3, 79.4, 39.7, 38.3, 28.4. HRMS (ESI)  $m/z$ :  $[\text{M} + \text{H}]^+$  Calcd for  $\text{C}_{14}\text{H}_{19}\text{N}_2\text{O}_3\text{S}_2$  327.0832; Found 327.0831.

### (1*S*,4*R*)-1-((Benzo[*d*]oxazol-2-yl)disulfanyl)methyl)-7,7-dimethylbicyclo[2.2.1]heptan-2-one (22)

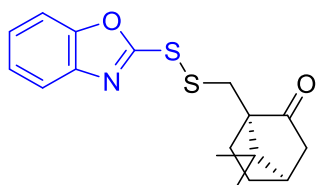

According to the general procedure for the synthesis of unsymmetrical disulfides, benzo[*d*]oxazole-2-thiol (67 mg, 0.45 mmol, 1.5 equiv) and (1*S*,4*R*)-1-

## Supporting Information

(mercaptomethyl)-7,7-dimethylbicyclo[2.2.1]heptan-2-one (55 mg, 0.3 mmol, 1.0 equiv) were applied. After purification by column chromatography on silica gel (EtOAc/petroleum ether 1:10), the title compound was obtained as a yellow oil (50 mg, 50%).  $^1\text{H}$  NMR (400 MHz,  $\text{CDCl}_3$ )  $\delta$  7.70–7.66 (m, 1H), 7.54–7.49 (m, 1H), 7.35–7.29 (m, 2H), 3.52 (d,  $J = 13.2$  Hz, 1H), 3.03 (d,  $J = 13.2$  Hz, 1H), 2.43–2.36 (m, 1H), 2.13–2.11 (m, 1H), 2.09–2.05 (m, 1H), 1.91 (d,  $J = 18.4$  Hz, 1H), 1.73–1.70 (m, 2H), 1.46–1.40 (m, 1H), 1.06 (s, 3H), 0.94 (s, 3H).  $^{13}\text{C}$  NMR (101 MHz,  $\text{CDCl}_3$ )  $\delta$  216.7, 163.5, 152.4, 142.0, 124.7, 124.6, 119.4, 110.3, 61.6, 48.0, 43.6, 43.0, 39.8, 26.8, 26.6, 20.2, 19.9. HRMS (ESI)  $m/z$ :  $[\text{M} + \text{H}]^+$  Calcd for  $\text{C}_{17}\text{H}_{20}\text{NO}_2\text{S}_2$  334.0930; Found 334.0931.

### Methyl S-(benzo[d]oxazol-2-ylthio)-N-(tert-butoxycarbonyl)-L-cysteinate (23)

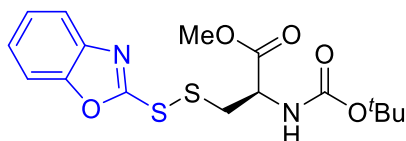

According to the general procedure for the synthesis of unsymmetrical disulfides, benzo[d]oxazole-2-thiol (67 mg, 0.45 mmol, 1.5 equiv) and *tert*-butyl methyl (tert-butoxycarbonyl)-L-cysteinate (78 mg, 0.3 mmol, 1.0 equiv) were applied. After purification by column chromatography on silica gel (EtOAc/petroleum ether 1:5), the title compound was obtained as a colorless oil (90 mg, 78%), > 99% e.e..  $^1\text{H}$  NMR (400 MHz,  $\text{CDCl}_3$ )  $\delta$  7.69–7.66 (m, 1H), 7.48–7.44 (m, 1H), 7.32–7.25 (m, 2H), 6.20 (d,  $J = 8.4$  Hz, 1H), 4.71–4.64 (m, 1H), 3.70 (s, 3H), 3.57–3.41 (m, 2H), 1.39 (s, 9H).  $^{13}\text{C}$  NMR (101 MHz,  $\text{CDCl}_3$ )  $\delta$  170.8, 163.5, 155.2, 152.5, 141.5, 124.9, 124.7, 119.4, 110.3, 80.2, 52.7, 42.1, 29.7, 28.2. HRMS (ESI)  $m/z$ :  $[\text{M} + \text{H}]^+$  Calcd for  $\text{C}_{16}\text{H}_{21}\text{N}_2\text{O}_5\text{S}_2$  385.0886; Found 385.0886.  $[\alpha]_{\text{D}}^{15} = 1.92^\circ$  ( $c = 0.05$ ,  $\text{CHCl}_3$ ). HPLC analysis: The enantiomeric excess was determined on a CHIRALPAK AD-H column (10%  $i$ PrOH in hexane, 1.0 mL/min, 25  $^\circ\text{C}$ ,  $\lambda = 250$  nm),  $t_{\text{R}}$  (major) = 18.466 min.

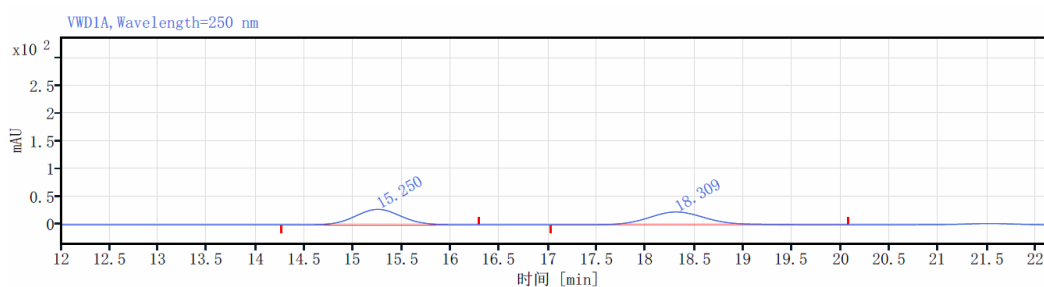

| Resolution Time (min) | Width (min) | Area  | Height | Area % |
|-----------------------|-------------|-------|--------|--------|
| 15.250                | 2.019       | 916.6 | 28.0   | 48.87  |
| 18.309                | 3.053       | 958.8 | 23.2   | 51.13  |
| Total VWD1A           |             |       | 1875.4 |        |

## Supporting Information

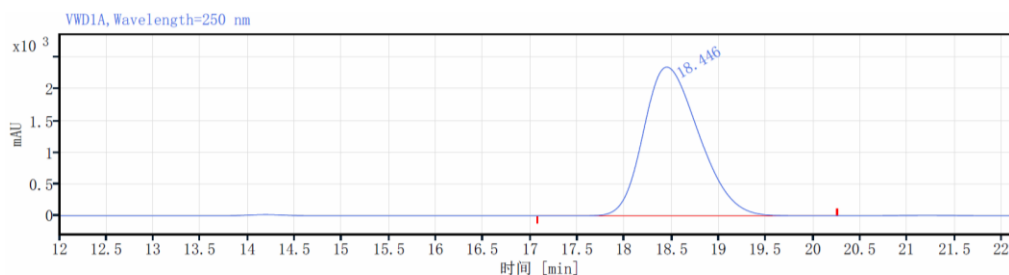

| Resolution Time (min) | Width (min) | Area    | Height | Area % |
|-----------------------|-------------|---------|--------|--------|
| 18.446                | 3.180       | 96605.9 | 2354.2 | 100.00 |
| Total VWD1A           |             | 96605.9 |        |        |

### *tert*-Butyl 2-((2-(benzo[*d*]oxazol-2-yl)disulfanyl)ethyl)carbamoylpyrrolidine-1-carboxylate (**24**)

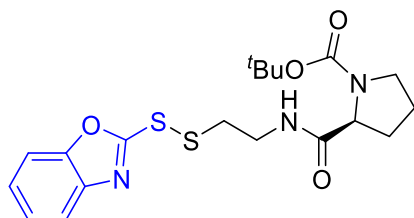

According to the general procedure for the synthesis of unsymmetrical disulfides, benzo[*d*]oxazole-2-thiol (67 mg, 0.45 mmol, 1.5 equiv) and *tert*-butyl 2-((2-mercaptoethyl)carbamoyl)pyrrolidine-1-carboxylate (82 mg, 0.3 mmol, 1.0 equiv) were applied. After purification by column chromatography on silica gel (EtOAc/petroleum ether 1:2), the title compound was obtained as a colorless oil (75 mg, 56%), > 99% e.e.. Rotamers, the integrations are given as observed. <sup>1</sup>H NMR (400 MHz, CDCl<sub>3</sub>) δ 8.01–8.00 (m, 0.3H), 7.75–7.67 (m, 0.3H), 7.52–7.46 (m, 0.4H), 7.35–7.26 (m, 5H), 6.78–6.68 (m, 0.4H), 5.60–5.36 (m, 1H), 4.57–4.24 (m, 3.3H), 4.02–3.54 (m, 3H), 3.50–3.36 (m, 0.8H), 3.12–2.98 (m, 1.3H), 1.49–1.38 (m, 9H). <sup>13</sup>C NMR (101 MHz, CDCl<sub>3</sub>) δ 170.5, 155.3, 152.5, 141.3, 137.2, 128.4, 127.7, 124.9, 110.3, 80.5, 73.3, 70.0, 69.8, 60.4, 39.0, 37.1, 28.3. HRMS (ESI) *m/z*: [M + H]<sup>+</sup> Calcd for C<sub>19</sub>H<sub>26</sub>N<sub>3</sub>O<sub>4</sub>S<sub>2</sub> 424.1359; Found 424.1359. [α]<sub>D</sub><sup>15</sup> = -12.57° (c = 0.1, CHCl<sub>3</sub>). HPLC analysis: The enantiomeric excess was determined on a CHIRALPAK AD-H column (5% *i*PrOH in hexane, 1.0 mL/min, 25 °C, λ = 250 nm), t<sub>R</sub> (major) = 49.053 min, t<sub>R</sub> (minor) = 22.039 min.

## Supporting Information

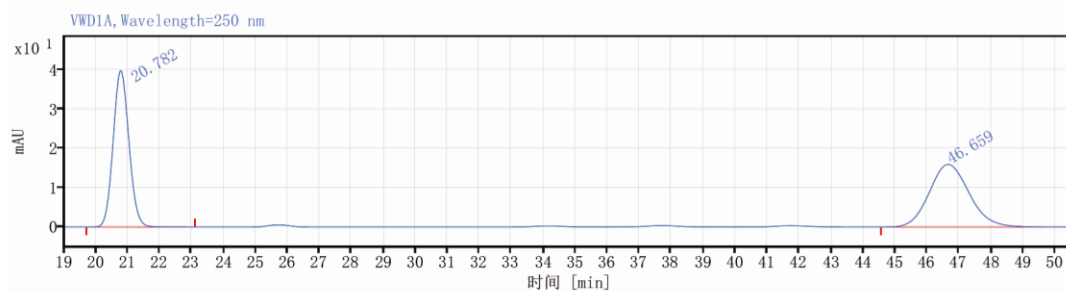

| Resolution Time (min) | Width (min) | Area   | Height | Area % |
|-----------------------|-------------|--------|--------|--------|
| 20.782                | 3.403       | 1369.6 | 39.9   | 49.53  |
| 46.659                | 5.880       | 1395.4 | 16.0   | 50.47  |
| Total VWD1A           |             |        | 2765.0 |        |

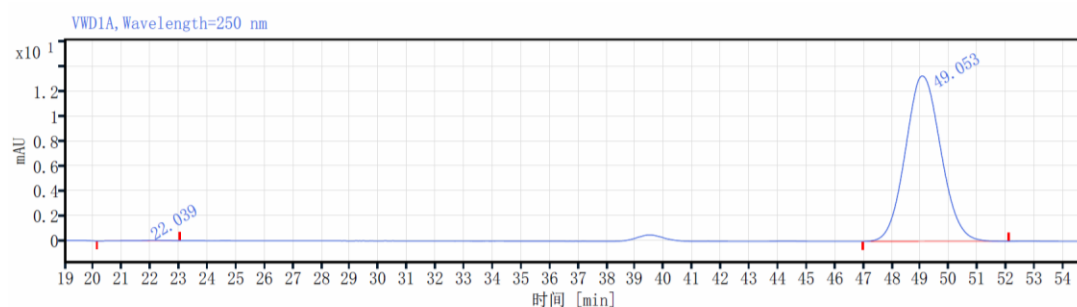

| Resolution Time (min) | Width (min) | Area   | Height | Area % |
|-----------------------|-------------|--------|--------|--------|
| 22.039                | 0.719       | 2.2    | 0.0    | 0.19   |
| 49.053                | 5.112       | 1148.5 | 13.3   | 99.81  |
| Total VWD1A           |             |        | 1150.7 |        |

### (2*S*,3*S*,4*R*,5*S*,6*R*)-2-(Acetoxymethyl)-6-(benzo[*d*]oxazol-2-ylidisulfanyl)tetrahydro-2*H*-pyran-3,4,5-triyl triacetate (**25**)<sup>7</sup>

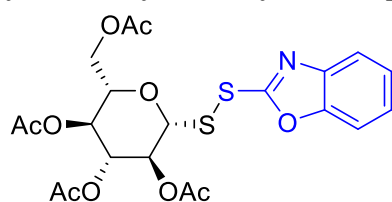

According to the general procedure for the synthesis of unsymmetrical disulfides, benzo[*d*]oxazole-2-thiol (67 mg, 0.45 mmol, 1.5 equiv) and (2*S*,3*S*,4*R*,5*S*,6*R*)-2-(acetoxymethyl)-6-mercaptotetrahydro-2*H*-pyran-3,4,5-triyl triacetate (110 mg, 0.3 mmol, 1.0 equiv) were applied. After purification by column chromatography on silica gel (EtOAc/petroleum ether 1:2), the title compound was obtained as a white solid (112 mg, 73%). <sup>1</sup>H NMR (400 MHz, CDCl<sub>3</sub>) δ 7.65–7.60 (m, 1H), 7.50–7.45 (m, 1H), 7.32–7.28 (m, 2H), 5.29–5.21 (m, 2H), 5.10–5.02 (m, 1H), 4.77–4.70 (m, 1H), 4.04–3.99 (m, 1H), 3.94–3.91 (m, 1H), 3.73–3.69 (m, 1H), 2.03 (s, 3H), 1.98–1.95 (m, 6H), 1.79 (s, 3H). <sup>13</sup>C NMR (101 MHz, CDCl<sub>3</sub>) δ 170.3, 170.0, 169.2 (2C), 161.7, 152.1, 141.8, 125.0, 124.7, 119.4, 110.2, 86.3, 76.0, 73.4, 69.1, 67.6, 61.5, 20.6, 20.5 (2C), 20.3.



## Supporting Information

### 1-(4-Chlorobenzyl)-2-(4-methoxybenzyl)disulfide (26)<sup>8</sup>

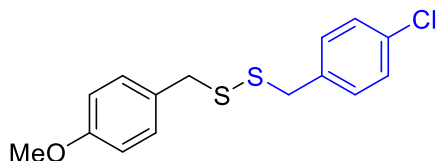

According to the general procedure for the synthesis of unsymmetrical disulfides, (4-chlorophenyl)methanethiol (68 mg, 0.45 mmol, 1.5 equiv) and (4-methoxyphenyl)methanethiol (46 mg, 0.3 mmol, 1.0 equiv) were applied. After purification by column chromatography on silica gel (EtOAc/petroleum ether 1:100), the title compound was obtained as a white solid (32 mg, 35%). <sup>1</sup>H NMR (400 MHz, CDCl<sub>3</sub>) δ 7.31–7.27 (m, 2H), 7.20–7.14 (m, 4H), 6.89–6.85 (m, 2H), 3.81 (s, 3H), 3.62 (s, 2H), 3.55 (s, 2H). <sup>13</sup>C NMR (101 MHz, CDCl<sub>3</sub>) δ 159.0, 135.9, 133.2, 130.7, 130.5, 129.1, 128.5, 76.7, 55.3, 42.7, 42.3.

### Methyl 3-((4-chlorobenzyl)disulfanyl)propanoate (27)<sup>9</sup>

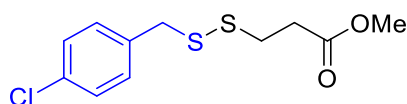

According to the general procedure for the synthesis of unsymmetrical disulfides, (4-chlorophenyl)methanethiol (68 mg, 0.45 mmol, 1.5 equiv) and methyl 3-mercaptopropanoate (37 mg, 0.3 mmol, 1.0 equiv) were applied. After purification by column chromatography on silica gel (EtOAc/petroleum ether 1:20), the title compound was obtained as a colorless oil (38 mg, 46%). <sup>1</sup>H NMR (400 MHz, CDCl<sub>3</sub>) δ 7.33–7.27 (m, 4H), 3.86 (s, 2H), 3.71 (s, 3H), 2.72–2.68 (m, 2H), 2.66–2.62 (m, 2H). <sup>13</sup>C NMR (101 MHz, CDCl<sub>3</sub>) δ 172.0, 135.8, 133.3, 130.5, 128.7, 51.8, 42.6, 33.8, 32.8.

### Methyl 3-((4-methoxybenzyl)disulfanyl)propanoate (28)

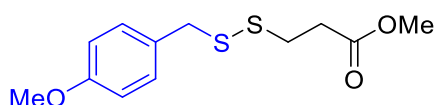

According to the general procedure for the synthesis of unsymmetrical disulfides, (4-methoxyphenyl)methanethiol (69 mg, 0.45 mmol, 1.5 equiv) and methyl 3-mercaptopropanoate (37 mg, 0.3 mmol, 1.0 equiv) were applied. After purification by column chromatography on silica gel (EtOAc/petroleum ether 1:10), the title compound was obtained as a colorless oil (29 mg, 36%). <sup>1</sup>H NMR (400 MHz, CDCl<sub>3</sub>) δ 7.26–7.22 (m, 2H), 6.87–6.83 (m, 2H), 3.86 (s, 2H), 3.80 (s, 3H), 3.68 (s, 3H), 2.69–2.60 (m, 4H). <sup>13</sup>C NMR (101 MHz, CDCl<sub>3</sub>) δ 172.2, 159.0, 130.4, 129.1, 113.9, 55.2, 51.8, 42.9, 33.8, 32.8. HRMS (ESI) m/z: [M + Na]<sup>+</sup> Calcd for C<sub>12</sub>H<sub>16</sub>NaO<sub>3</sub>S<sub>2</sub> 295.0433; Found 295.0434.

## Supporting Information

### Methyl 3-((4-(*tert*-butyl)benzyl)disulfanyl)propanoate (29)

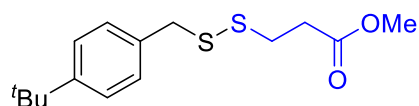

According to the general procedure for the synthesis of unsymmetrical disulfides, methyl 3-mercaptopropanoate (54 mg, 0.45 mmol, 1.5 equiv) and 4-(*tert*-butyl)phenylmethanethiol (54 mg, 0.3 mmol, 1.0 equiv) were applied. After purification by column chromatography on silica gel (EtOAc/petroleum ether 1:20), the title compound was obtained as a colorless oil (45 mg, 51%).  $^1\text{H}$  NMR (400 MHz,  $\text{CDCl}_3$ )  $\delta$  7.36–7.33 (m, 2H), 7.27–7.24 (m, 2H), 3.88 (s, 2H), 3.67 (s, 3H), 2.67–2.57 (m, 4H), 1.31 (s, 9H).  $^{13}\text{C}$  NMR (101 MHz,  $\text{CDCl}_3$ )  $\delta$  172.2, 150.6, 134.0, 128.9, 125.5, 51.8, 43.2, 34.5, 33.8, 32.8, 31.3. HRMS (ESI)  $m/z$ :  $[\text{M} + \text{H}]^+$  Calcd for  $\text{C}_{15}\text{H}_{23}\text{O}_2\text{S}_2$  299.1134; Found 299.1134.

### 2-Ethylhexyl 2-((furan-2-ylmethyl)disulfanyl)acetate (30)

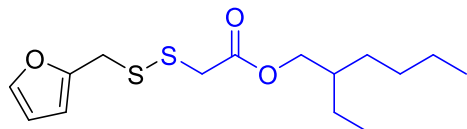

According to the general procedure for the synthesis of unsymmetrical disulfides, 2-ethylhexyl 2-mercaptoacetate (92 mg, 0.45 mmol, 1.5 equiv) and furan-2-ylmethanethiol (35 mg, 0.3 mmol, 1.0 equiv) were applied. After purification by column chromatography on silica gel (EtOAc/petroleum ether 1:50), the title compound was obtained as a colorless oil (48 mg, 50%).  $^1\text{H}$  NMR (400 MHz,  $\text{CDCl}_3$ )  $\delta$  7.40–7.38 (m, 1H), 6.35–6.33 (m, 1H), 6.29–6.26 (m, 1H), 4.06–4.04 (m, 2H), 3.98 (s, 2H), 3.26 (s, 2H), 1.63–1.58 (m, 1H), 1.39–1.35 (m, 2H), 1.32–1.28 (m, 6H), 0.91–0.87 (m, 6H).  $^{13}\text{C}$  NMR (101 MHz,  $\text{CDCl}_3$ )  $\delta$  169.6, 149.9, 142.6, 110.8, 109.1, 67.9, 41.4, 38.7, 35.7, 30.3, 28.9, 23.7, 23.0, 14.0, 11.0. HRMS (ESI)  $m/z$ :  $[\text{M} + \text{H}]^+$  Calcd for  $\text{C}_{15}\text{H}_{25}\text{O}_3\text{S}_2$  317.1240; Found 317.1240.

### 3-((Furan-2-ylmethyl)disulfanyl)butan-2-one (31)

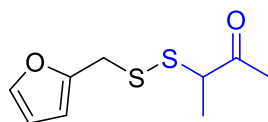

According to the general procedure for the synthesis of unsymmetrical disulfides, 3-mercaptopentan-2-one (47 mg, 0.45 mmol, 1.5 equiv) and furan-2-ylmethanethiol (35 mg, 0.3 mmol, 1.0 equiv) were applied. After purification by column chromatography on silica gel (EtOAc/petroleum ether 1:10), the title compound was obtained as a yellow oil (36 mg, 56%).  $^1\text{H}$  NMR (400 MHz,  $\text{CDCl}_3$ )  $\delta$  7.40–7.37 (m, 1H), 6.33–6.32 (m, 1H), 6.26–6.25 (m, 1H), 3.89 (s, 2H), 3.28 (q,  $J = 7.2$  Hz, 1H), 2.26 (s, 3H), 1.35 (d,  $J = 7.0$  Hz, 3H).  $^{13}\text{C}$  NMR (101 MHz,  $\text{CDCl}_3$ )  $\delta$  205.0, 149.8, 142.6, 110.7, 109.2, 53.6, 35.7,

## Supporting Information

27.4, 15.4. HRMS (ESI)  $m/z$ :  $[M + H]^+$  Calcd for  $C_9H_{13}O_2S_2$  217.0351; Found 217.0351.

### Methyl 3-(*tert*-butyldisulfanyl)propanoate (32)<sup>9</sup>

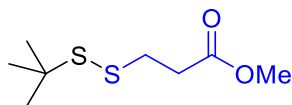

According to the general procedure for the synthesis of unsymmetrical disulfides, methyl 3-mercaptopropanoate (54 mg, 0.45 mmol, 1.5 equiv) and *tert*-butylthiol (27 mg, 0.3 mmol, 1.0 equiv) were applied. After purification by column chromatography on silica gel (EtOAc/petroleum ether 1:50), the title compound was obtained as a colorless oil (27 mg, 42%). <sup>1</sup>H NMR (400 MHz, CDCl<sub>3</sub>)  $\delta$  3.69 (s, 3H), 2.92 (t,  $J = 7.2$  Hz, 2H), 2.72 (t,  $J = 7.2$  Hz, 2H), 1.33 (s, 9H). <sup>13</sup>C NMR (101 MHz, CDCl<sub>3</sub>)  $\delta$  172.3, 51.8, 48.0, 34.8, 34.1, 29.9.

### Methyl 3-(butyldisulfanyl)propanoate (33)

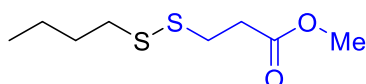

According to the general procedure for the synthesis of unsymmetrical disulfides, methyl 3-mercaptopropanoate (54 mg, 0.45 mmol, 1.5 equiv) and butane-1-thiol (28 mg, 0.3 mmol, 1.0 equiv) were applied. After purification by column chromatography on silica gel (EtOAc/petroleum ether 1:50), the title compound was obtained as a colorless oil (24 mg, 39%). <sup>1</sup>H NMR (400 MHz, CDCl<sub>3</sub>)  $\delta$  3.70 (s, 3H), 2.90 (t,  $J = 7.2$  Hz, 2H), 2.75 (t,  $J = 7.2$  Hz, 2H), 2.69 (t,  $J = 7.2$  Hz, 2H), 1.68–1.61 (m, 2H), 1.45–1.36 (m, 2H), 0.92 (t,  $J = 7.3$  Hz, 3H). <sup>13</sup>C NMR (101 MHz, CDCl<sub>3</sub>)  $\delta$  172.3, 51.8, 38.7, 34.0, 33.1, 31.2, 21.6, 13.7. HRMS (ESI)  $m/z$ :  $[M + H]^+$  Calcd for  $C_8H_{17}O_2S_2$  209.0664; Found 209.0665.

### 3-(*tert*-Butyldisulfanyl)propan-1-ol (34)<sup>9</sup>

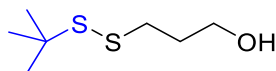

According to the general procedure for the synthesis of unsymmetrical disulfides, *tert*-butylthiol (36 mg, 0.45 mmol, 1.5 equiv) and 3-mercaptopropan-1-ol (28 mg, 0.3 mmol, 1.0 equiv) were applied. After purification by column chromatography on silica gel (EtOAc/petroleum ether 1:5), the title compound was obtained as a colorless oil (24 mg, 45%). <sup>1</sup>H NMR (400 MHz, CDCl<sub>3</sub>)  $\delta$  3.74 (t,  $J = 6.1$  Hz, 2H), 2.81 (t,  $J = 7.1$  Hz, 2H), 1.95–1.89 (m, 2H), 1.33 (s, 9H). <sup>13</sup>C NMR (101 MHz, CDCl<sub>3</sub>)  $\delta$  61.0, 47.9, 36.9, 31.9, 29.9.

### Methyl 3-((3-hydroxypropyl)disulfanyl)propanoate (35)

## Supporting Information

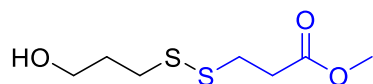

According to the general procedure for the synthesis of unsymmetrical disulfides, methyl 3-mercaptopropanoate (54 mg, 0.45 mmol, 1.5 equiv) and 3-mercaptopropan-1-ol (28 mg, 0.3 mmol, 1.0 equiv) were applied. After purification by column chromatography on silica gel (EtOAc/petroleum ether 1:3), the title compound was obtained as a colorless oil (41 mg, 65%). <sup>1</sup>H NMR (400 MHz, CDCl<sub>3</sub>) δ 3.73 (t, *J* = 6.1 Hz, 2H), 3.69 (s, 3H), 2.91 (t, *J* = 7.3 Hz, 2H), 2.79 (t, *J* = 7.1 Hz, 2H), 2.74 (t, *J* = 7.2 Hz, 2H), 1.96–1.90 (m, 2H), 1.87 (s, 1H). <sup>13</sup>C NMR (101 MHz, CDCl<sub>3</sub>) δ 172.3, 60.8, 51.9, 35.0, 33.9, 33.0, 31.7. HRMS (ESI) *m/z*: [M + H]<sup>+</sup> Calcd for C<sub>7</sub>H<sub>15</sub>O<sub>3</sub>S<sub>2</sub> 211.0457; Found 211.0456.

### 2-Ethylhexyl 2-((2-((tert-butoxycarbonyl)amino)ethyl)disulfanyl)acetate (36)

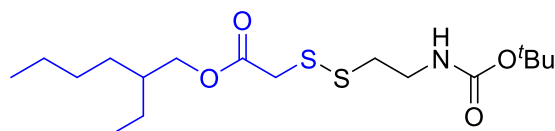

According to the general procedure for the synthesis of unsymmetrical disulfides, 2-ethylhexyl 2-mercaptoacetate (92 mg, 0.45 mmol, 1.5 equiv) and *tert*-butyl (2-mercaptoethyl)carbamate (53 mg, 0.3 mmol, 1.0 equiv) were applied. After purification by column chromatography on silica gel (EtOAc/petroleum ether 1:5), the title compound was obtained as a colorless oil (63 mg, 55%). <sup>1</sup>H NMR (400 MHz, CDCl<sub>3</sub>) δ 5.00 (s, 1H), 4.10–4.00 (m, 2H), 3.48–3.42 (m, 3H), 2.84 (t, *J* = 6.0 Hz, 2H), 1.61–1.55 (m, 1H), 1.42 (s, 9H), 1.37–1.33 (m, 2H), 1.31–1.21 (m, 6H), 0.89–0.85 (m, 6H). <sup>13</sup>C NMR (101 MHz, CDCl<sub>3</sub>) δ 169.6, 155.7, 79.4, 68.0, 41.3, 39.0, 38.6, 38.4, 30.2, 28.8, 28.3, 23.6, 22.9, 14.0, 10.9. HRMS (ESI) *m/z*: [M + H]<sup>+</sup> Calcd for C<sub>17</sub>H<sub>34</sub>NO<sub>4</sub>S<sub>2</sub> 380.1924; Found 380.1924.

### *tert*-Butyl (2-((3-oxobutan-2-yl)disulfanyl)ethyl)carbamate (37)

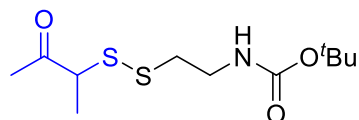

According to the general procedure for the synthesis of unsymmetrical disulfides, 3-mercaptobutan-2-one (47 mg, 0.45 mmol, 1.5 equiv) and *tert*-butyl (2-mercaptoethyl)carbamate (53 mg, 0.3 mmol, 1.0 equiv) were applied. After purification by column chromatography on silica gel (EtOAc/petroleum ether 1:5), the title compound was obtained as a colorless oil (52 mg, 62%). <sup>1</sup>H NMR (400 MHz, CDCl<sub>3</sub>) δ 4.99 (s, 1H), 3.51 (q, *J* = 7.2 Hz, 1H), 3.44–3.33 (m, 2H), 2.79–2.70 (m, 2H), 2.27 (s, 3H), 1.41–1.39 (m, 12H). <sup>13</sup>C NMR (101 MHz, CDCl<sub>3</sub>) δ 204.8, 155.6, 79.4, 53.2, 39.1, 38.7, 28.3, 26.9, 15.3. HRMS (ESI) *m/z*: [M + H]<sup>+</sup> Calcd for C<sub>11</sub>H<sub>22</sub>NO<sub>3</sub>S<sub>2</sub> 280.1036;

## Supporting Information

Found 280.1035.

### Methyl *N*-(*tert*-butoxycarbonyl)-((3-oxobutan-2-yl)thio)-L-cysteinate (38)

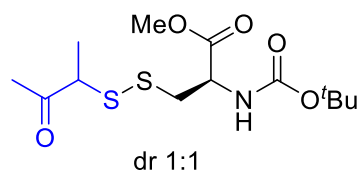

According to the general procedure for the synthesis of unsymmetrical disulfides, 3-mercaptobutan-2-one (47 mg, 0.45 mmol, 1.5 equiv) and *tert*-butyl methyl (*tert*-butoxycarbonyl)-L-cysteinate (78 mg, 0.3 mmol, 1.0 equiv) were applied. After purification by column chromatography on silica gel (EtOAc/petroleum ether 1:3), the title compound was obtained as a colorless oil (72 mg, 71%). <sup>1</sup>H NMR (400 MHz, CDCl<sub>3</sub>) δ 5.46–5.23 (m, 1H), 4.66–4.53 (m, 1H), 3.74 (s, 3H), 3.57–3.50 (m, 1H), 3.16–2.96 (m, 2H), 2.26 (d, *J* = 5.2 Hz, 3H), 1.46–1.38 (m, 12H). <sup>13</sup>C NMR (101 MHz, Chloroform-*d*) (one isomer) δ 204.5, 171.0, 170.9, 154.9, 80.2, 53.5, 52.8, 41.4, 28.2, 27.0, 15.3. HRMS (ESI) *m/z*: [M + H]<sup>+</sup> Calcd for C<sub>13</sub>H<sub>24</sub>NO<sub>5</sub>S<sub>2</sub> 338.1090; Found 338.1091. [α]<sub>D</sub><sup>15</sup> = 1.7° (c = 0.1, CHCl<sub>3</sub>).

### 2-((3-Bromo-1,1-diethoxypropan-2-yl)disulfanyl)benzo[*d*]oxazole (40)

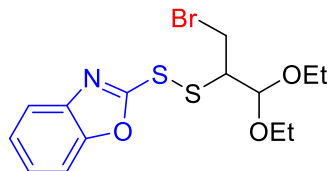

A dry flask charged with BDMS (100 mg, 0.45mmol, 1.5 equiv) and benzo[*d*]oxazole-2-thiol (67 mg, 0.45mmol, 1.5 equiv), was vacuumed and refilled with nitrogen (3 cycles). Dry DMF (3 mL) were injected to the flask at 0 °C with an ice bath. After a stirring of 5 min, K<sub>2</sub>CO<sub>3</sub> (62 mg, 0.45mmol, 1.5 equiv) and 2-(diethoxymethyl)thiirane (49 mg, 0.3mmol, 1.0 equiv) were added to the flask. The reaction mixture was then stirred at 0 °C for 1 h, before quenching with H<sub>2</sub>O. After the extraction with Et<sub>2</sub>O (10 mL X 3), the combined organic layers were washed with brine, dried over Na<sub>2</sub>SO<sub>4</sub>, filtrated and concentrated under reduced pressure. After purification by column chromatography on silica gel (EtOAc/petroleum ether 1:20), the title compound was obtained as a colorless oil (63 mg, 56%). <sup>1</sup>H NMR (400 MHz, CDCl<sub>3</sub>) δ 7.67–7.63 (m, 1H), 7.51–7.46 (m, 1H), 7.34–7.28 (m, 2H), 4.88 (d, *J* = 4.0 Hz, 1H), 3.92–3.83 (m, 2H), 3.81–3.71 (m, 2H), 3.64–3.55 (m, 3H), 1.24–1.20 (m, 6H). <sup>13</sup>C NMR (101 MHz, CDCl<sub>3</sub>) δ 162.8, 152.3, 141.8, 125.0, 124.6, 119.5, 110.3, 102.0, 64.2, 64.1, 57.9, 31.7, 15.2, 15.1. HRMS (ESI) *m/z*: [M + H]<sup>+</sup> Calcd for C<sub>14</sub>H<sub>19</sub>BrNO<sub>3</sub>S<sub>2</sub> 391.9984; Found 391.9983.

## Supporting Information

### 2-((2-Bromopropyl)disulfanyl)benzo[d]oxazole (42a)

### 2-((1-Bromopropan-2-yl)disulfanyl)benzo[d]oxazole (42b)

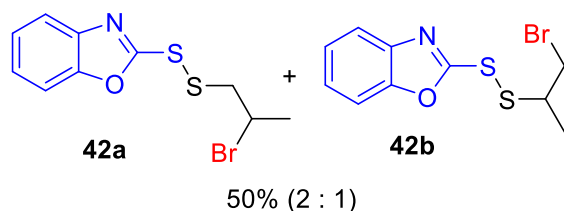

A dry flask charged with BDMS (100 mg, 0.45mmol, 1.5 equiv) and benzo[d]oxazole-2-thiol (67 mg, 0.45mmol, 1.5 equiv), was vacuumed and refilled with nitrogen (3 cycles). Dry DMF (3 mL) were injected to the flask at 0 °C with an ice bath. After a stirring of 5 min, K<sub>2</sub>CO<sub>3</sub> (62 mg, 0.45mmol, 1.5 equiv) and 2-methylthiirane (22 mg, 0.3mmol, 1.0 equiv) were added to the flask. The reaction mixture was then stirred at 0 °C for 1 h, before quenching with H<sub>2</sub>O. After the extraction with Et<sub>2</sub>O (10 mL X 3), the combined organic layers were washed with brine, dried over Na<sub>2</sub>SO<sub>4</sub>, filtrated and concentrated under reduced pressure (NMR yield with Anisole as the internal standard, 50%). After purification by column chromatography on silica gel (EtOAc/petroleum ether 1:100), the title compound was obtained as a colorless oil. The major isomer: <sup>1</sup>H NMR (400 MHz, CDCl<sub>3</sub>) δ 7.71–7.66 (m, 1H), 7.53–7.49 (m, 1H), 7.37–7.31 (m, 2H), 3.93–3.85 (m, 1H), 3.53–3.46 (m, 2H), 1.56–1.50 (m, 3H). <sup>13</sup>C NMR (101 MHz, CDCl<sub>3</sub>) δ 162.7, 152.4, 141.8, 125.0, 124.8, 119.5, 110.4, 47.3, 36.9, 18.3. HRMS (ESI) m/z: [M + H]<sup>+</sup> Calcd for C<sub>10</sub>H<sub>11</sub>BrNOS<sub>2</sub> 303.9460; Found 303.9460.

### 2-(*p*-Tolylthio)cyclohexyl acetate (43)<sup>10</sup>

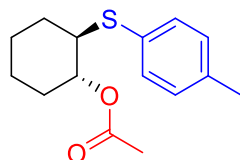

A dry flask, charged with BDMS (221 mg, 1 mmol, 2 equiv) and 4-methylbenzenethiol (124 mg, 1 mmol, 2 equiv), was vacuumed and refilled with nitrogen (3 cycles). Dry DCM (5 mL) were injected to the flask at 0 °C with an oil bath. After a stirring of 5 min, Et<sub>3</sub>N (152 mg, 1.5 mmol, 3.0 equiv), cyclohexene (41 mg, 0.5 mmol, 1.0 equiv) and acetic acid (60 mg, 1 mmol, 2.0 equiv) were added to the flask. The reaction mixture was then stirred and refluxed at 85 °C for 10 h, before quenching with H<sub>2</sub>O. After the extraction with Et<sub>2</sub>O (10 mL X 3), the combined organic layers were washed with brine, dried over Na<sub>2</sub>SO<sub>4</sub>, filtrated and concentrated under reduced pressure. After purification by column chromatography on silica gel (EtOAc/petroleum ether 1:50), the title compound was obtained as a yellow oil (116 mg, 88%). <sup>1</sup>H NMR (400 MHz, Chloroform-*d*) δ 7.36–7.32 (m, 2H), 7.10–7.08 (m, 2H), 4.78–4.72 (m, 1H), 3.07–3.01 (m, 1H), 2.31 (s, 3H), 2.11–2.02 (m, 2H), 1.95 (s, 3H), 1.71–1.63 (m, 2H), 1.42–1.28 (m, 4H). <sup>13</sup>C NMR (101 MHz, CDCl<sub>3</sub>) δ 170.2, 137.1, 133.1, 130.3, 129.4, 74.8, 50.4, 31.5, 31.2, 24.9, 23.4, 21.0, 20.9.

## Supporting Information

---

### *N*-(2-(*p*-Tolylthio)cyclohexyl)acetamide (**44**)<sup>10</sup>

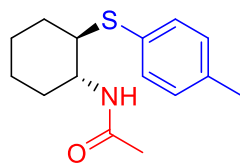

A dry flask charged with BDMS (221 mg, 1 mmol, 2 equiv) and 4-methylbenzenethiol (221 mg, 1 mmol, 2 equiv), was vacuumed and refilled with nitrogen (3 cycles). Dry MeCN (5 mL) were injected to the flask at 0 °C with an oil bath. After a stirring of 5 min, cyclohexene (41 mg, 0.5 mmol, 1.0 equiv) and H<sub>2</sub>O (18 mg, 1 mmol, 2.0 equiv) were added to the flask. The reaction mixture was then stirred and refluxed at 100 °C for 10 h, before quenching with H<sub>2</sub>O. After the extraction with Et<sub>2</sub>O (10 mL X 3), the combined organic layers were washed with brine, dried over Na<sub>2</sub>SO<sub>4</sub>, filtrated and concentrated under reduced pressure. After purification by column chromatography on silica gel (EtOAc/petroleum ether 1:1), the title compound was obtained as a white solid (21 mg, 16%). <sup>1</sup>H NMR (400 MHz, CDCl<sub>3</sub>) δ 7.34–7.32 (m, 2H), 7.11–7.09 (m, 2H), 5.62 (s, 1H), 3.72–3.64 (m, 1H), 2.82–2.72 (m, 1H), 2.31 (s, 3H), 2.19–2.03 (m, 2H), 1.93 (s, 3H), 1.74–1.62 (m, 2H), 1.36–1.18 (m, 4H). <sup>13</sup>C NMR (101 MHz, CDCl<sub>3</sub>) δ 169.4, 137.6, 133.8, 129.6, 129.5, 52.7, 51.8, 33.5, 33.0, 25.8, 24.4, 23.5, 21.1.

## 4 References

- [1] P. F. Huang, P. Wang, S. Tang, Z. J. Fu, A. W. Lei, *Angew. Chem. Int. Ed.* **2018**, *57*, 8115.
- [2] N. Stellenboom, R. Hunter, M. R. Caira, *Tetrahedron.* **2010**, *66*, 3228.
- [3] J. M. Guo, J. J. Zha, T. Zhang, C. H. Ding, Q. T. Tan, B. Xu, *Org. Lett.* **2021**, *23*, 3167.
- [4] T. R. DiRaimondo, N. M. Plugis, J. Xi, C. Khosla, *J. Med. Chem.* **2013**, *56*, 1301.
- [5] M. Krumb, L. M. Kammer, R. Forster, C. Grundke, T. Opatz, *ChemPhotoChem.* **2020**, *4*, 101.
- [6] J. K. Vandavasi, W. P. Hu, C. Y. Chen, J. J. Wang, *Tetrahedron* **2011**, *67*, 8895.
- [7] G. R. Morais, R. A. Falconer, *Tetrahedron Lett.* **2007**, *48*, 7637.
- [8] D. G. Wang, Q. He, K. Q. Shi, M. T. Xiong, Y. F. Zhou, Y. J. Pan, *Adv. Synth. Catal.* **2021**, *363*, 2767.

## Supporting Information

---

- [9] X. Qiu, X. X. Yang, Y. Q. Zhang, S. Song, N. Jiao, *Org. Chem. Front.* **2019**, *6*, 2220.
- [10] D. Y. Wang, Z. H. Yan, Q. H. Xie, R. X. Zhang, S. Lin, Y. X. Wang, *Org. Biomol. Chem.* **2017**, *15*, 1998.
- [11] M. G. Silvestri, C. H. Wong, *J. Org. Chem.* **2001**, *66*, 910.
- [12] S. Knoppe, N. Kothalawala, V. R. Jupally, A. Dass, T. Bürgi, *Chem. Commun.* **2012**, *48*, 4630.



# Supporting Information

## 5 NMR spectra

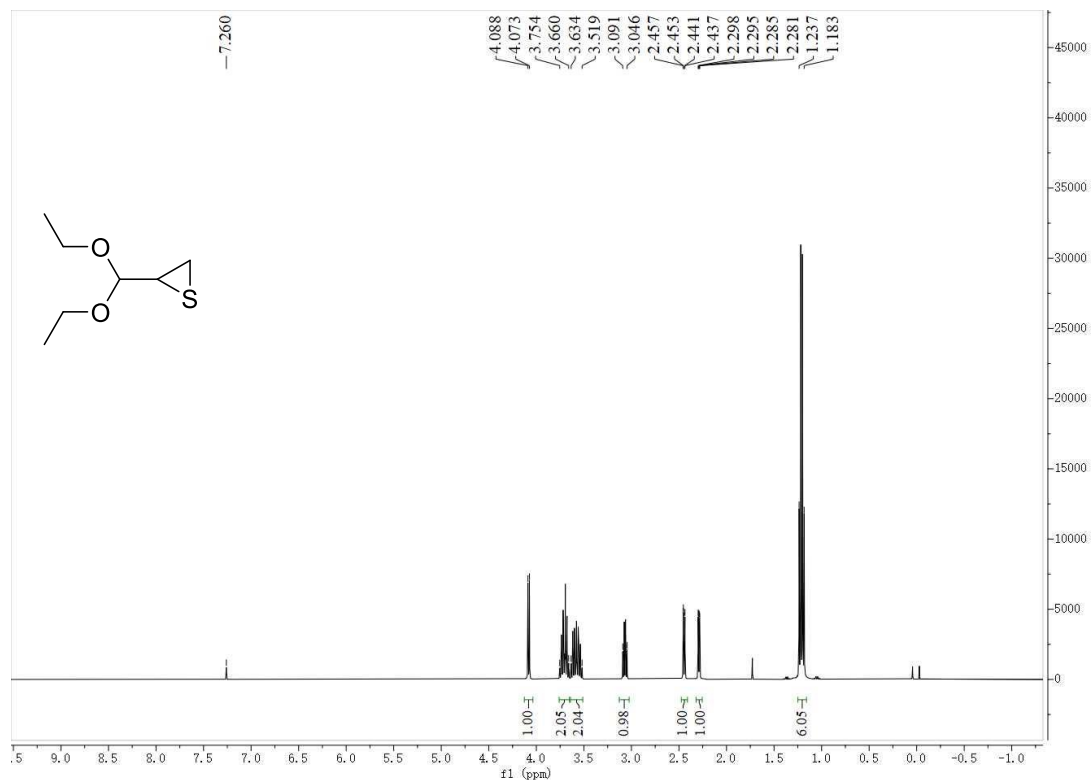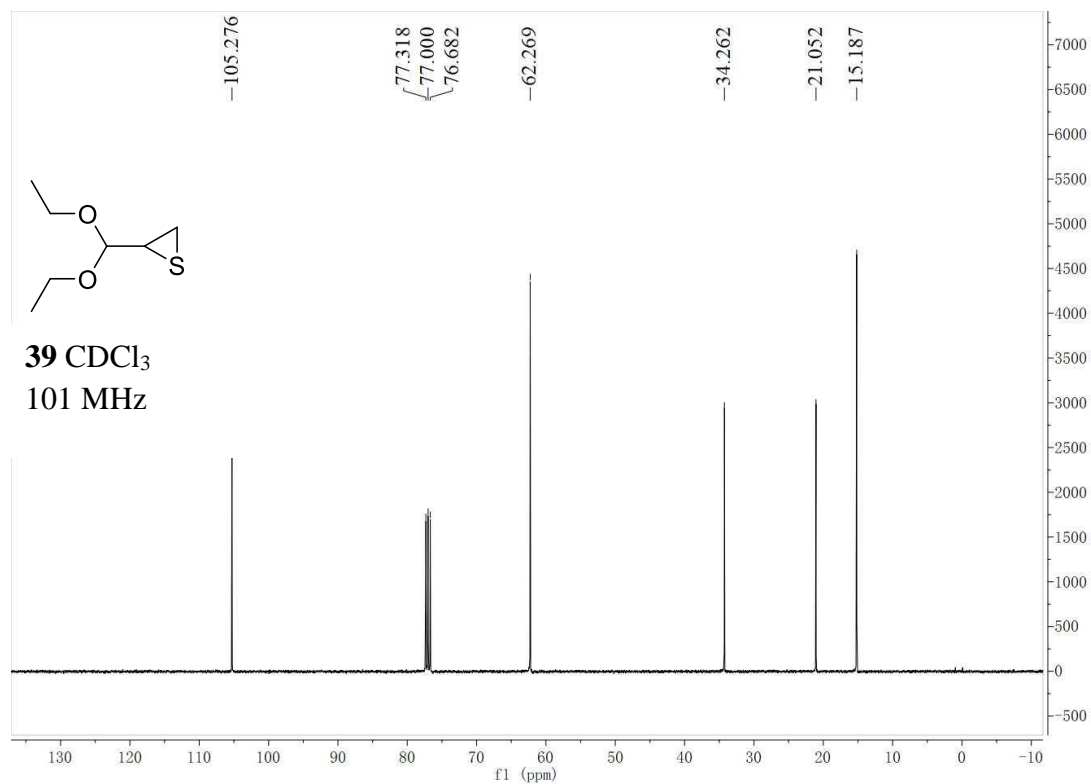

# Supporting Information

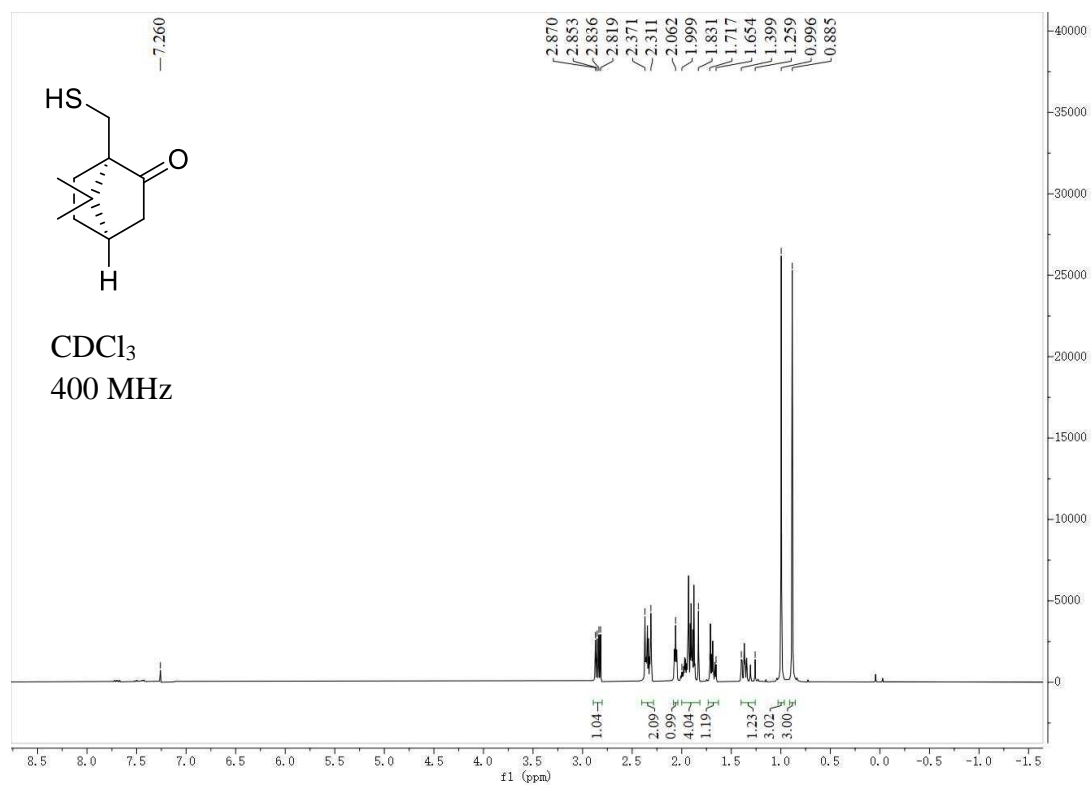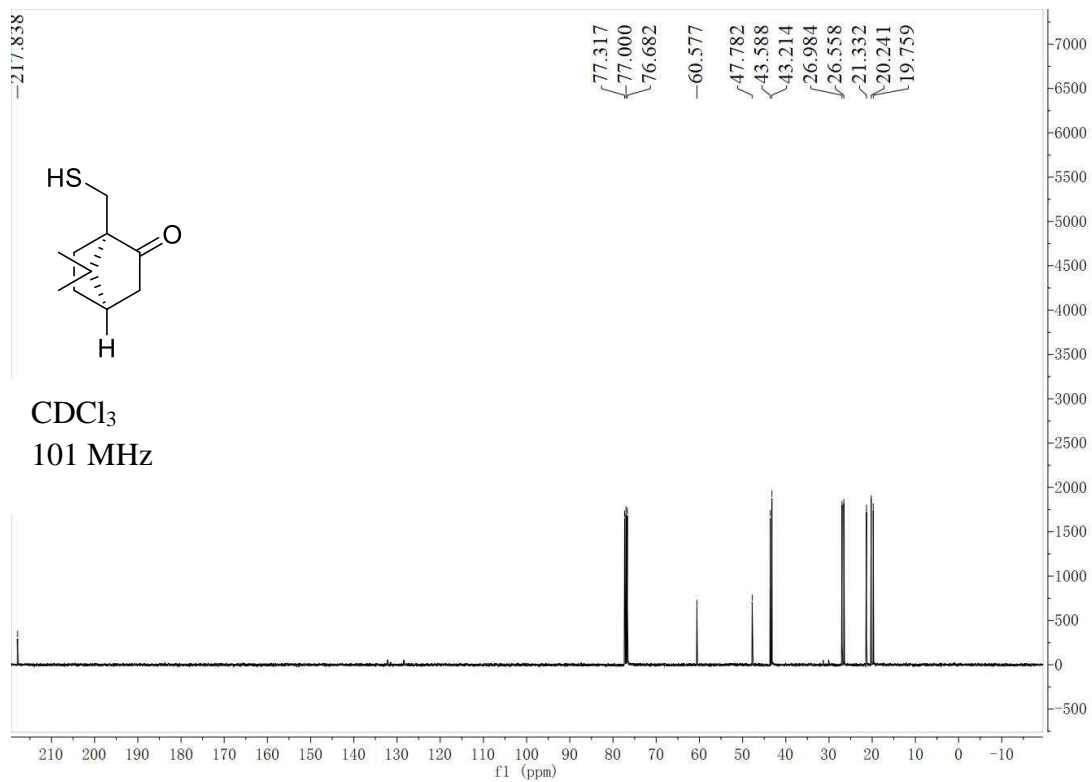

# Supporting Information

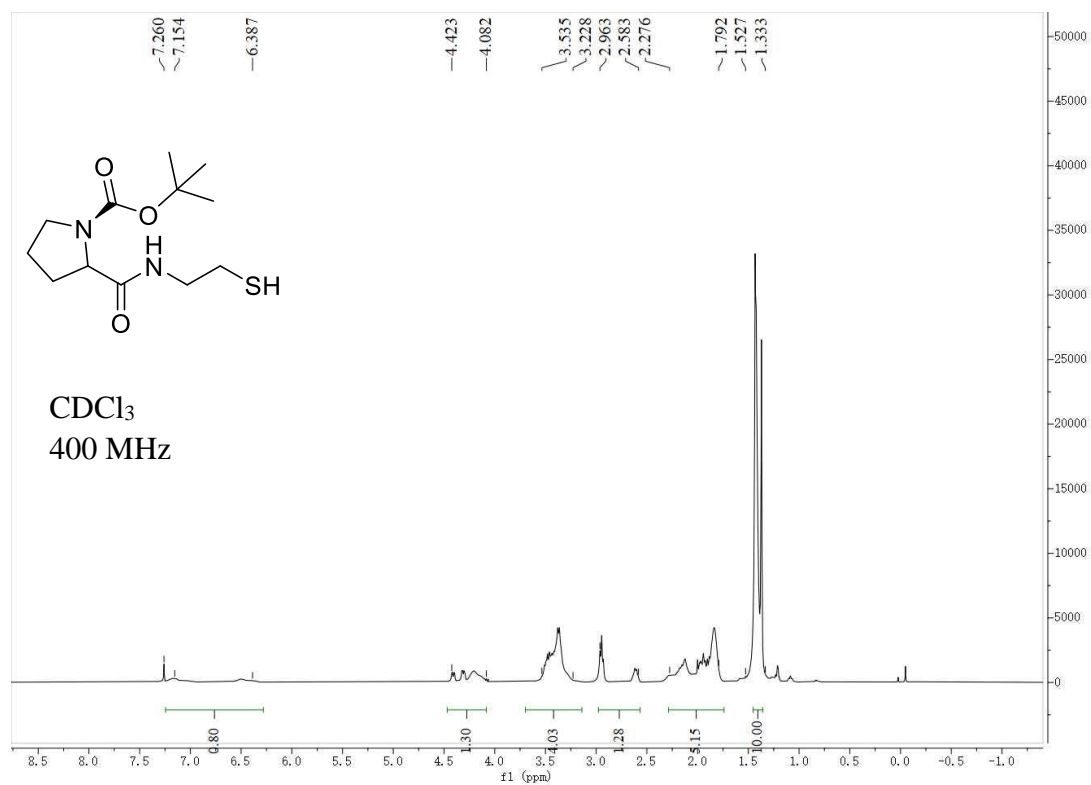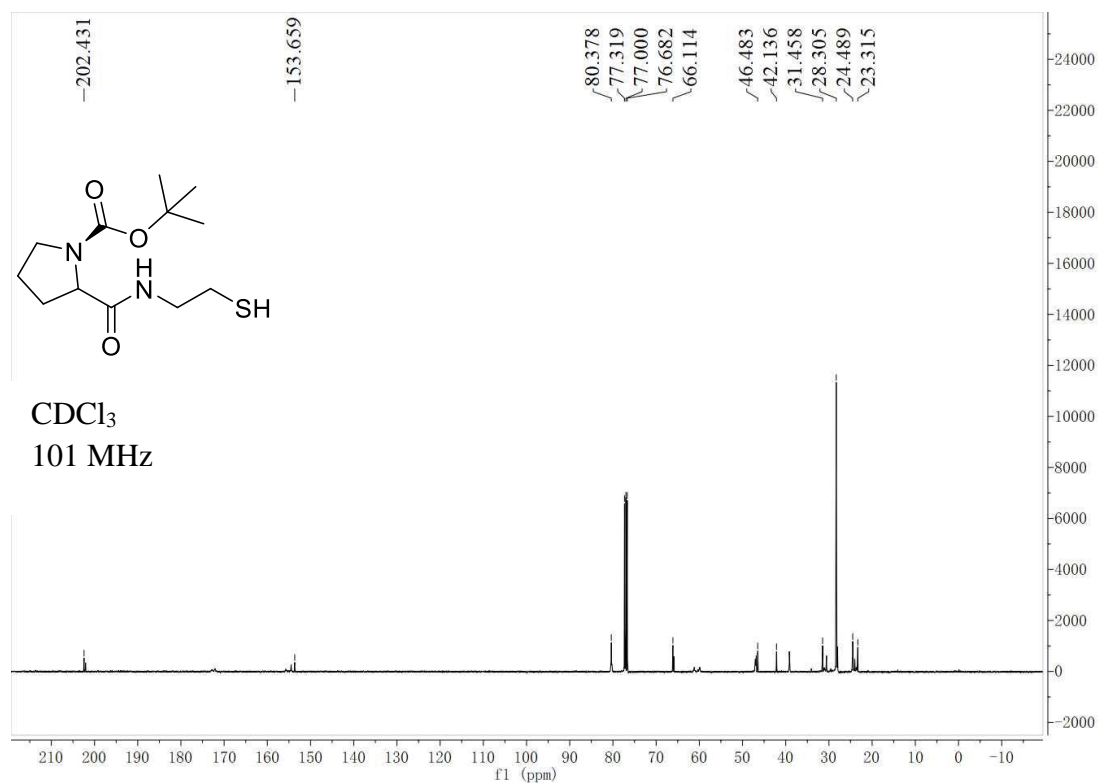

# Supporting Information

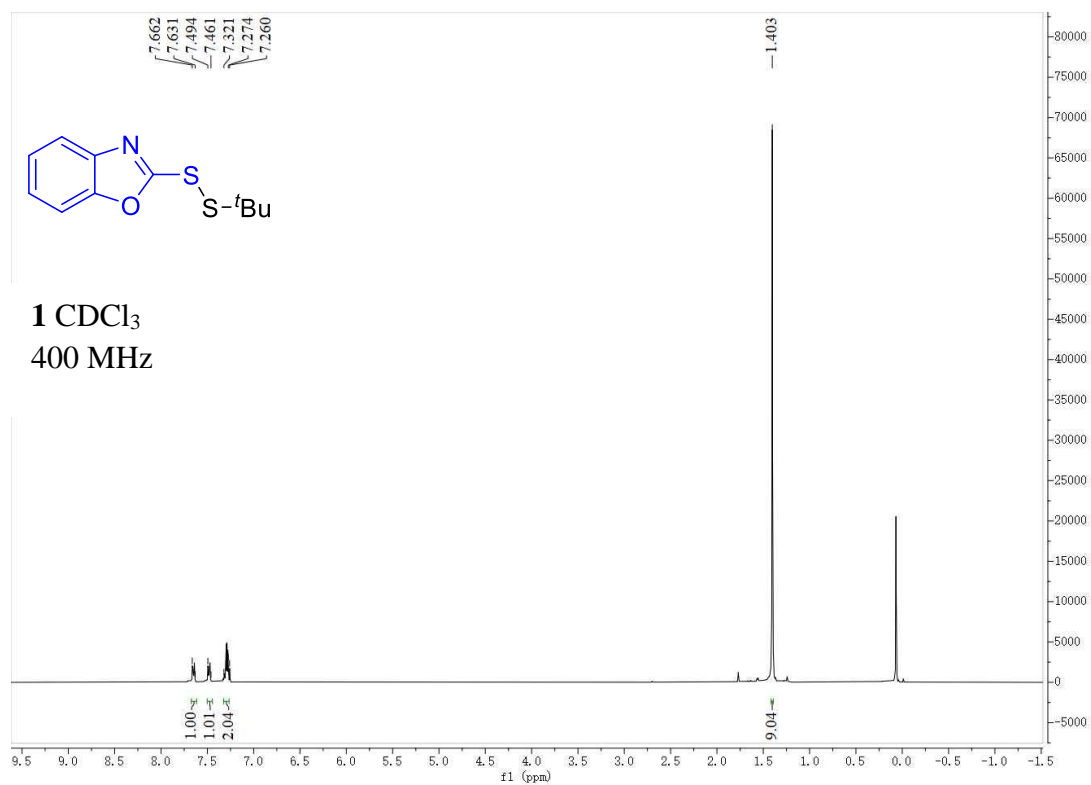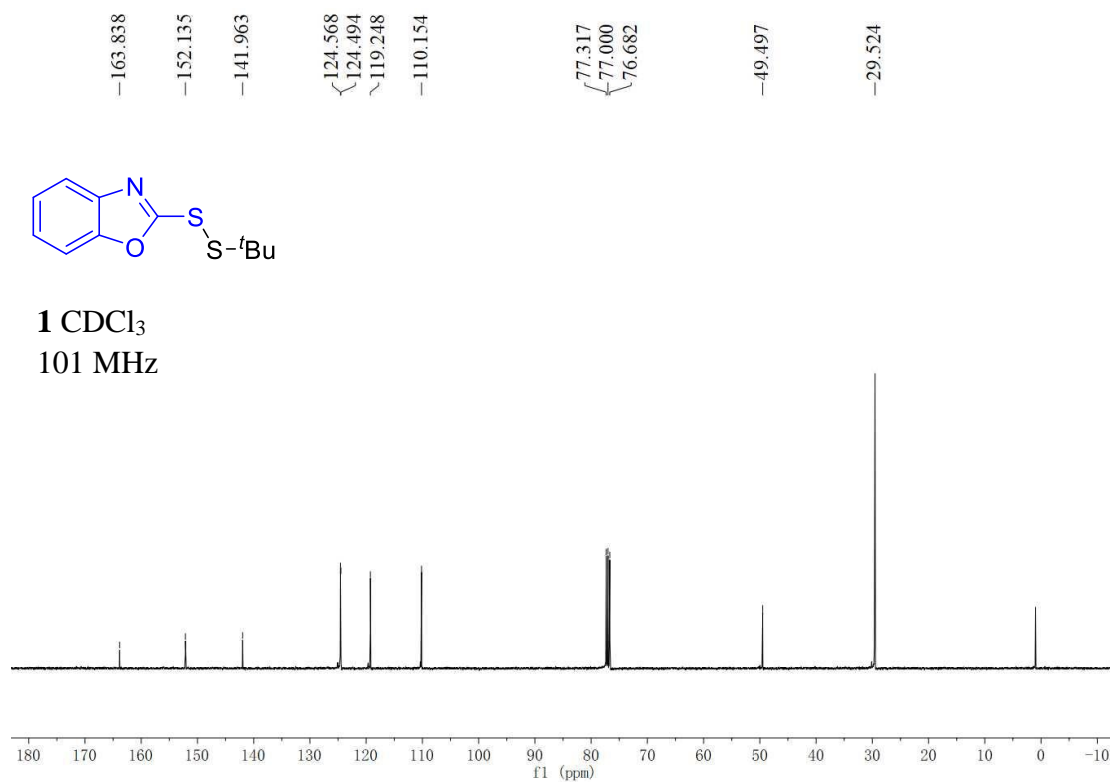

# Supporting Information

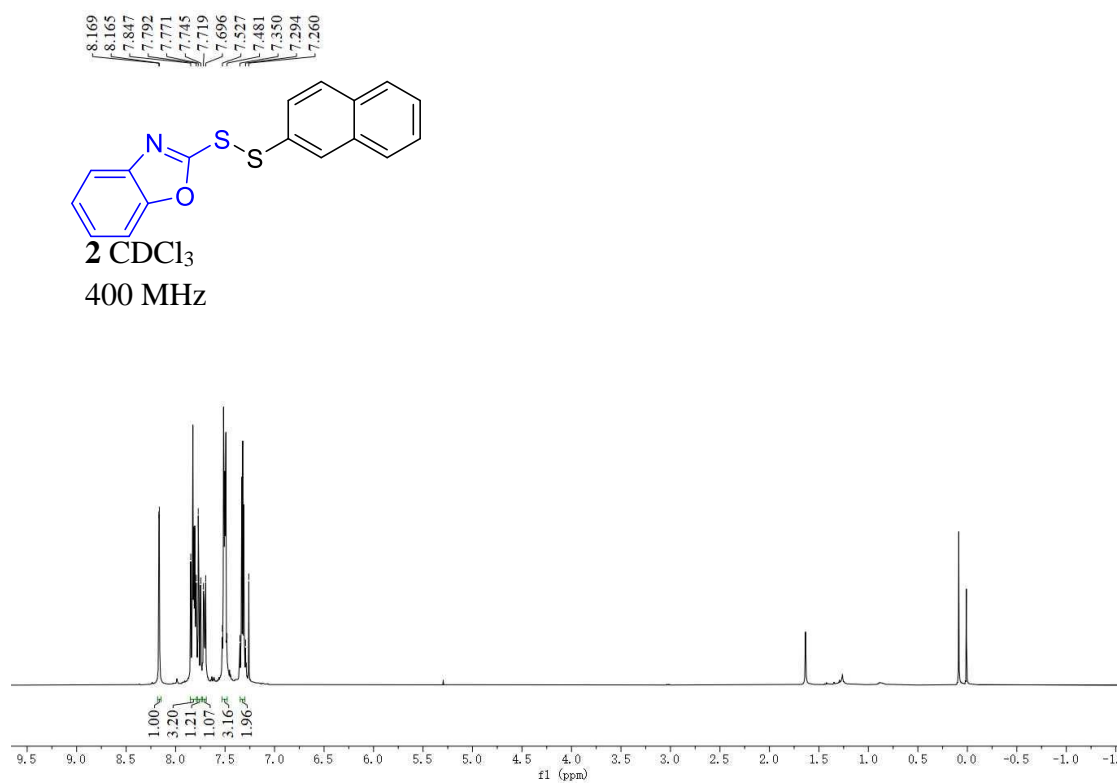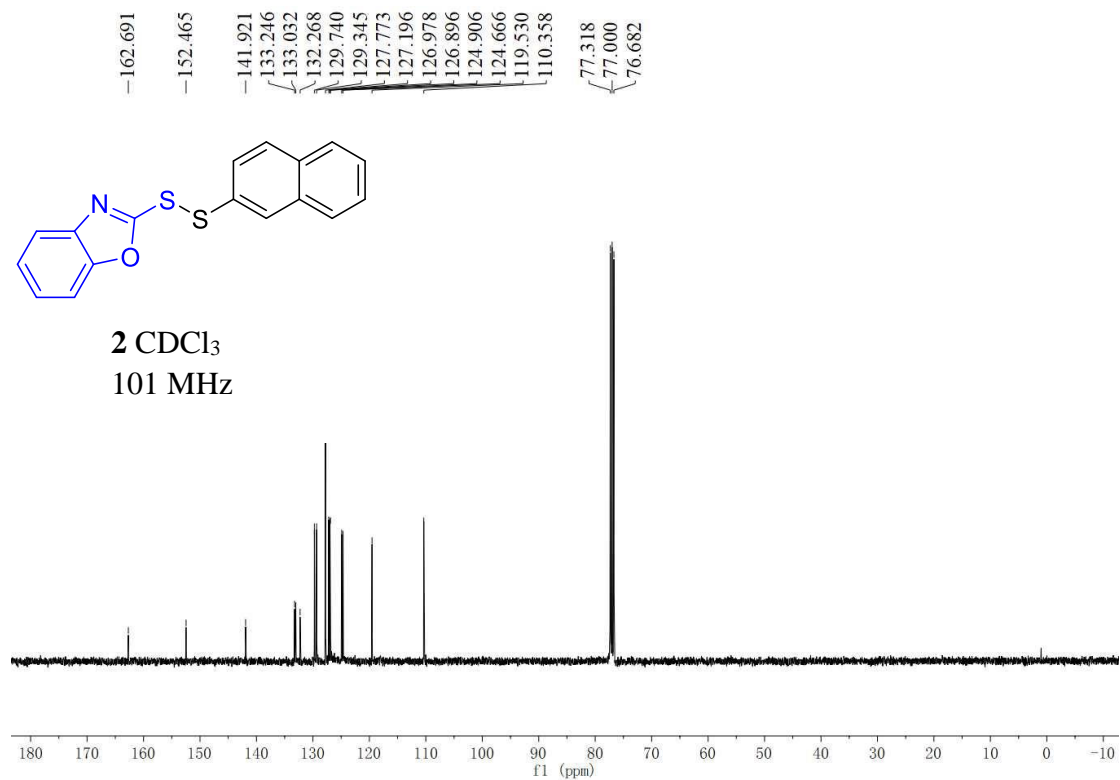

# Supporting Information

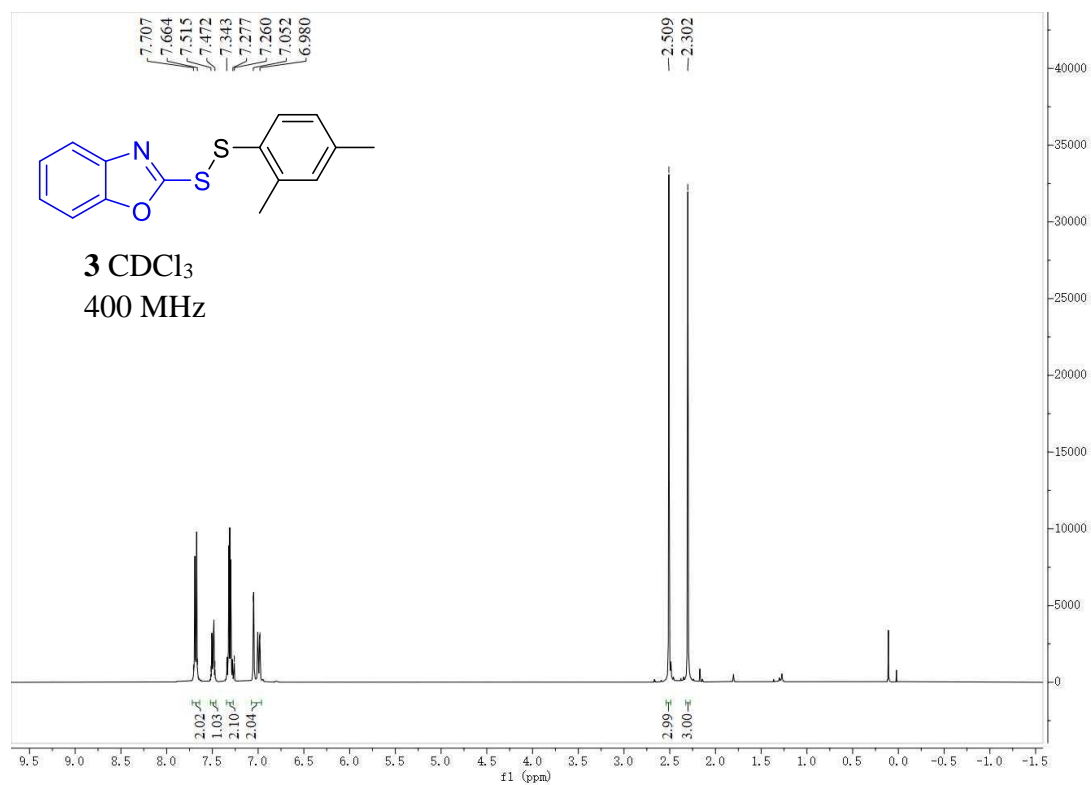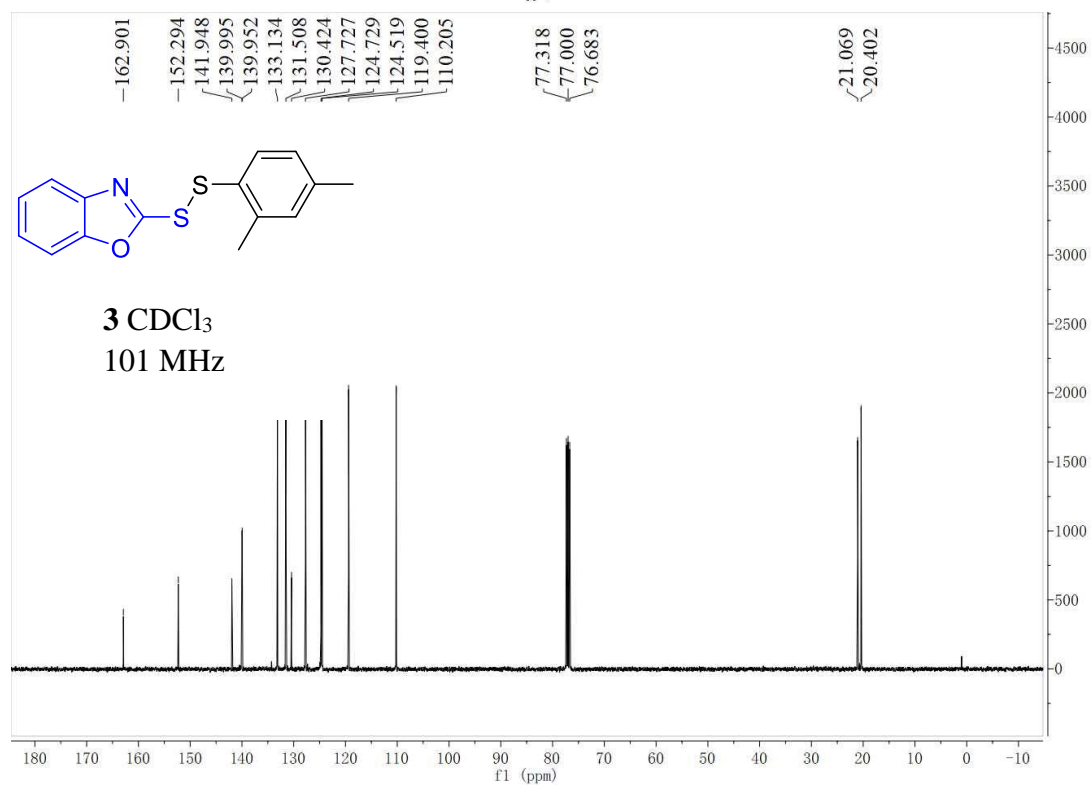

# Supporting Information

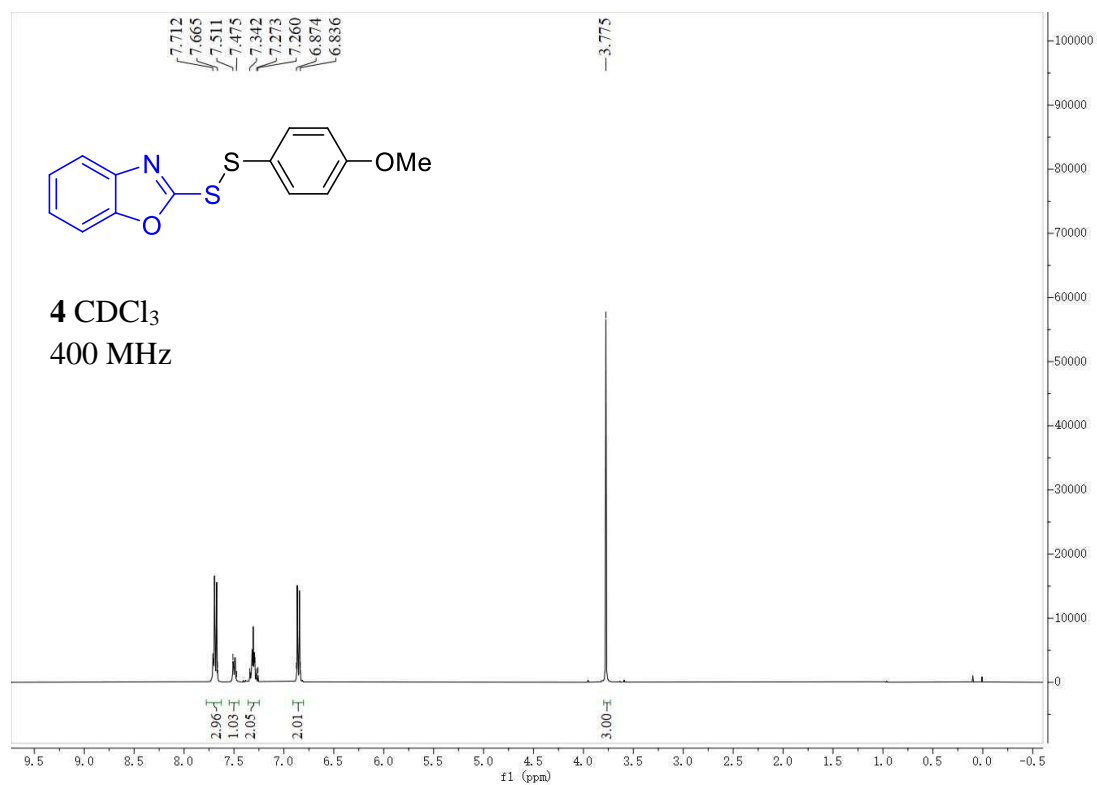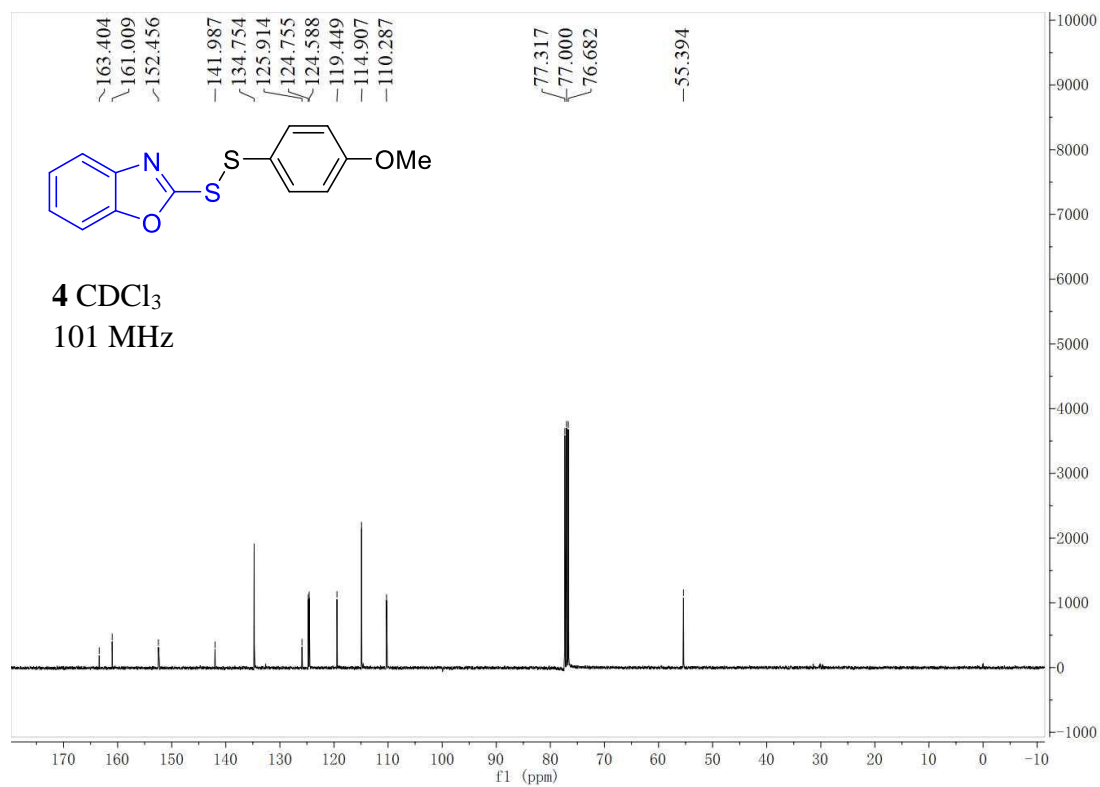

# Supporting Information

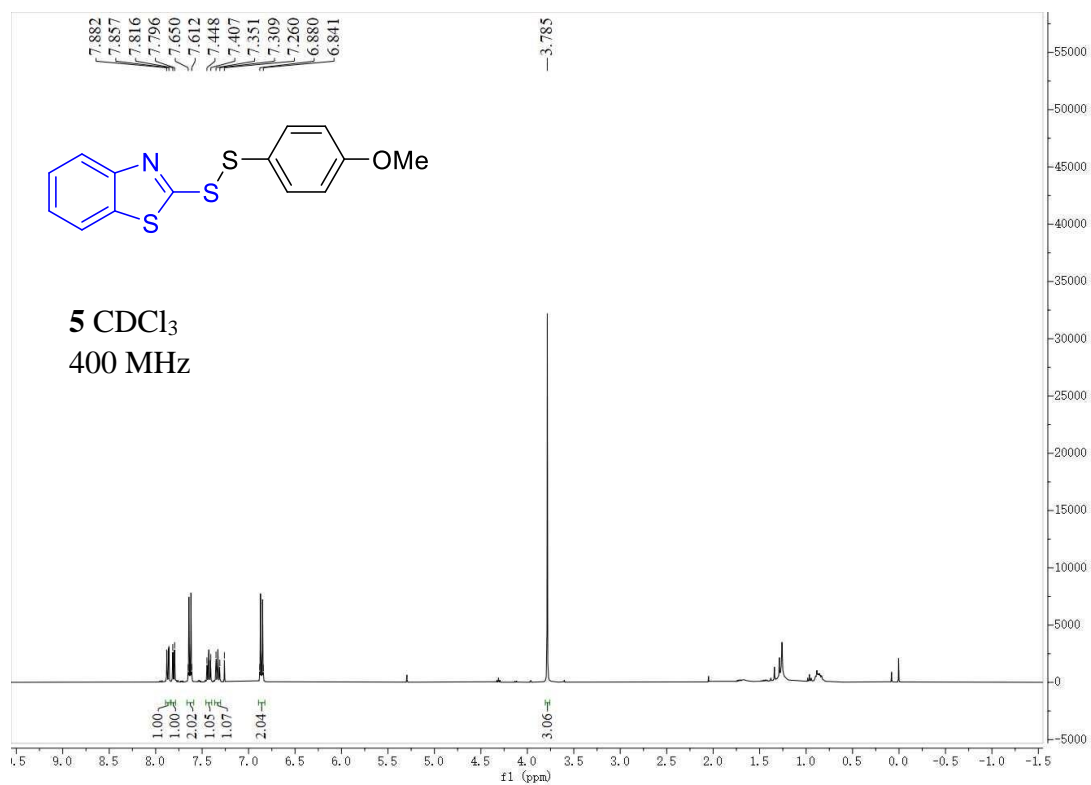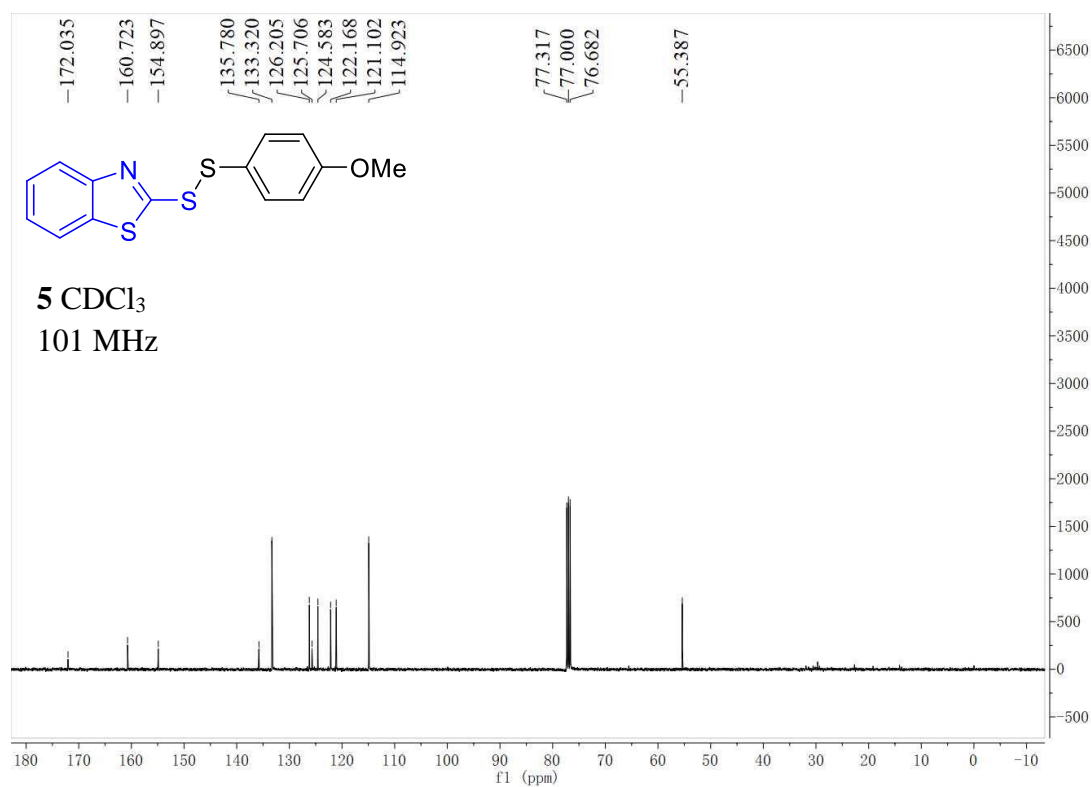



# Supporting Information

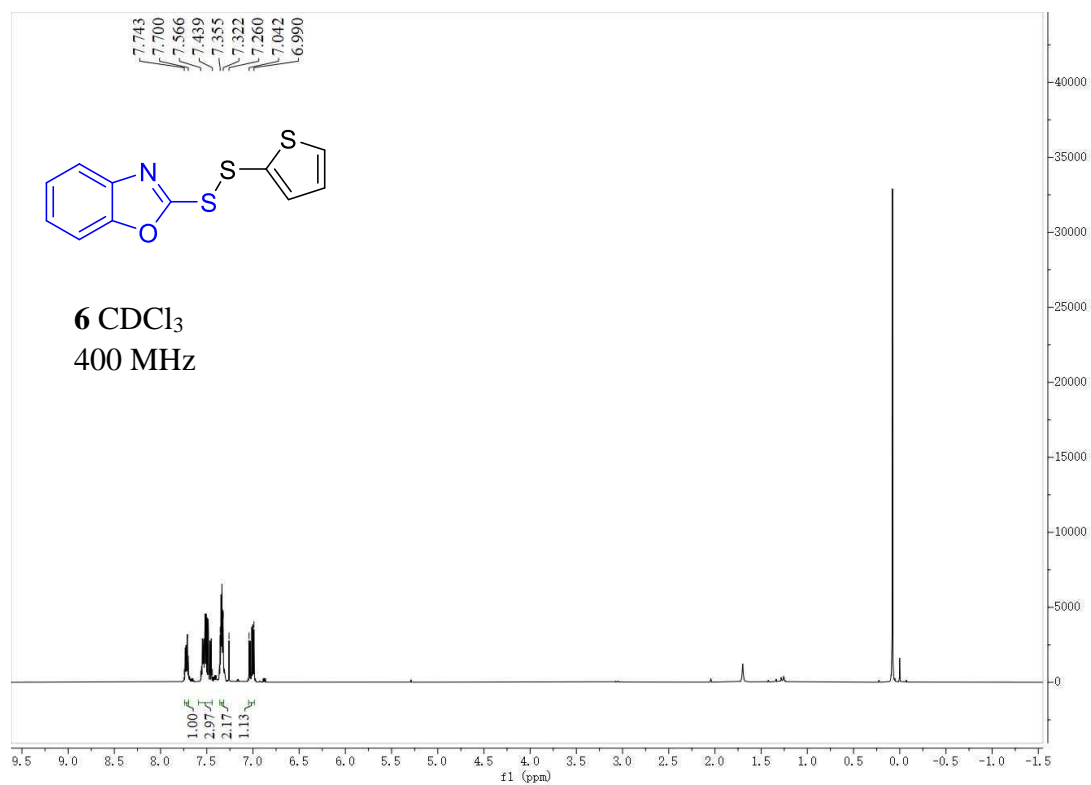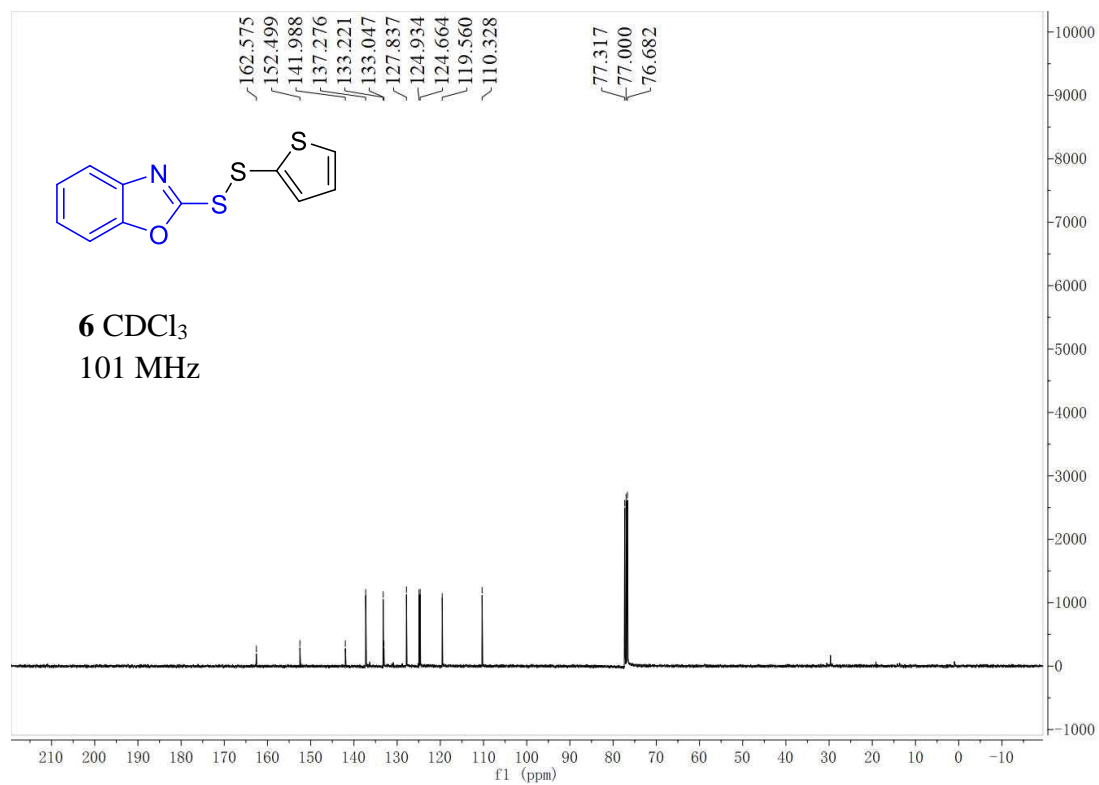

# Supporting Information

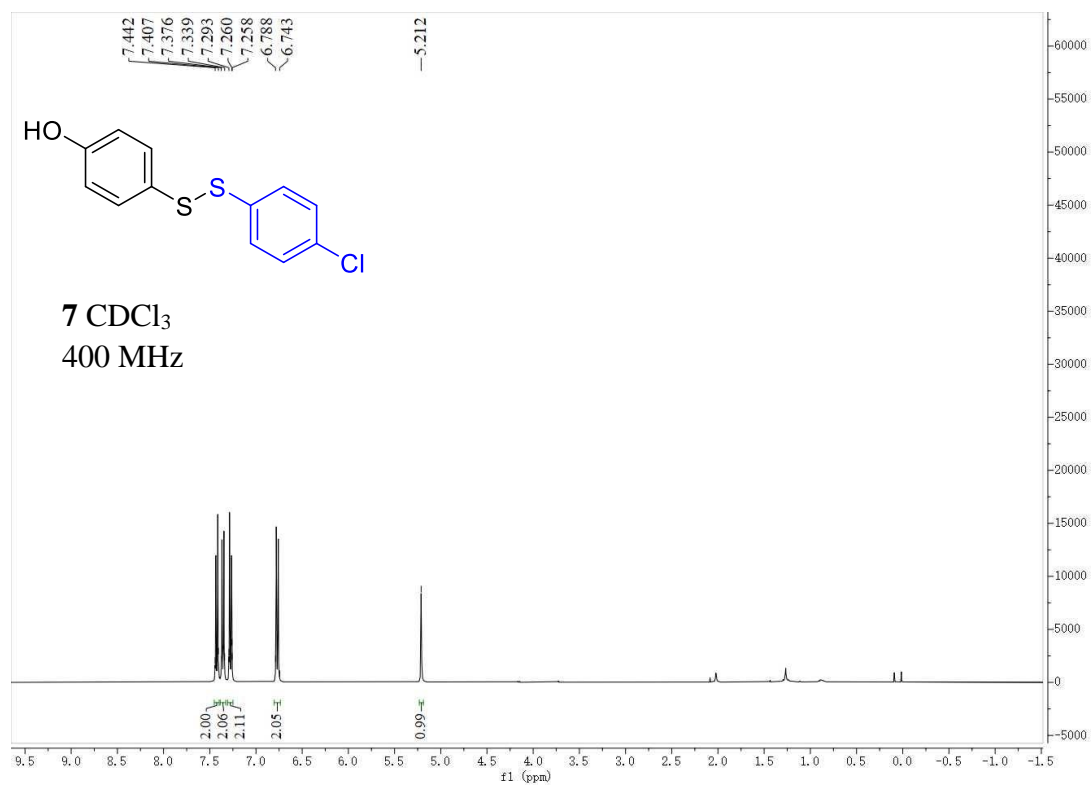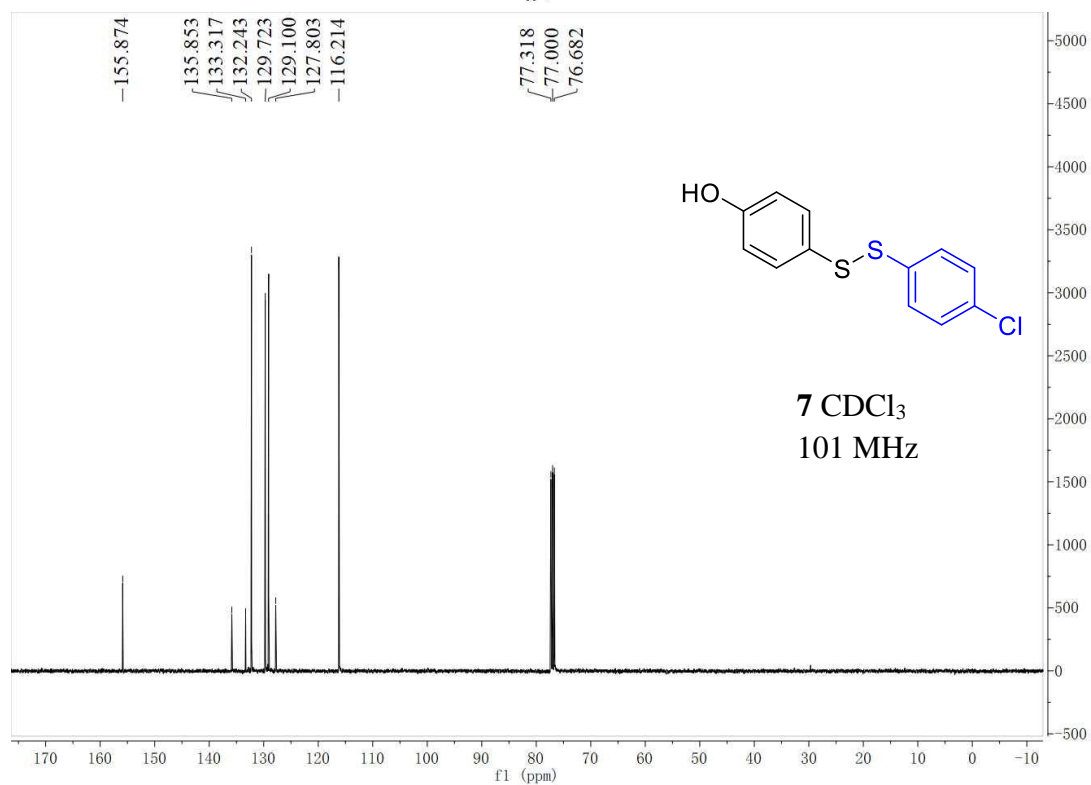

# Supporting Information

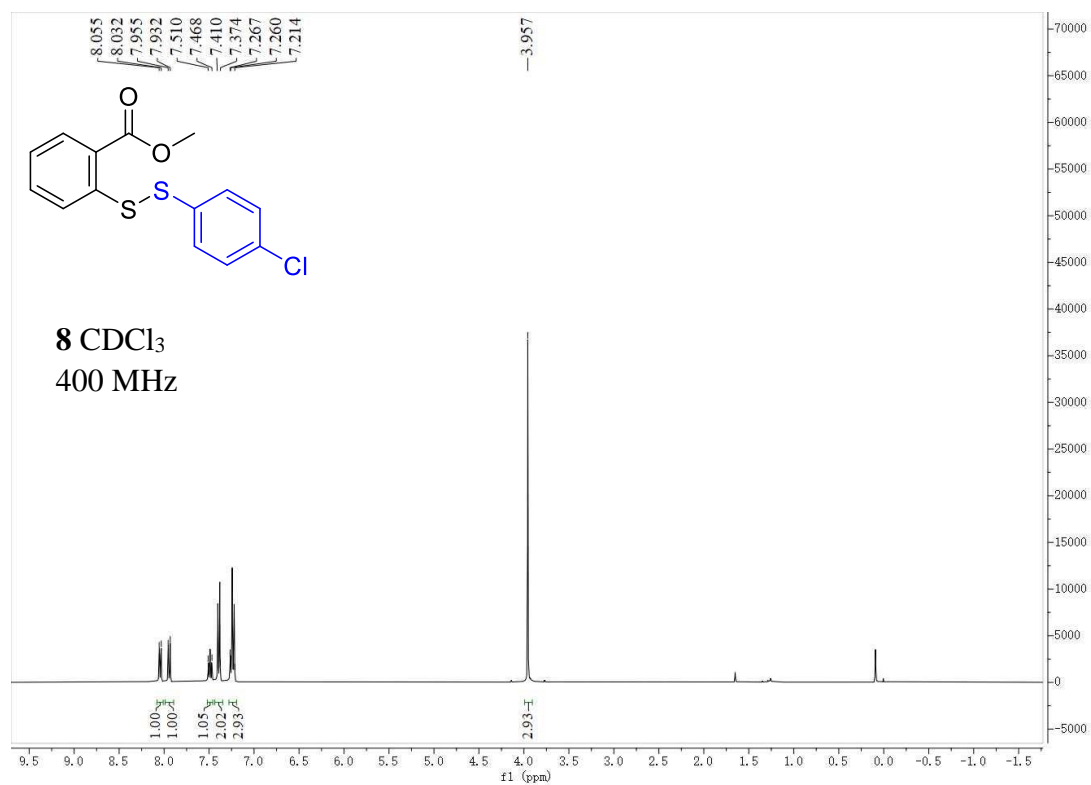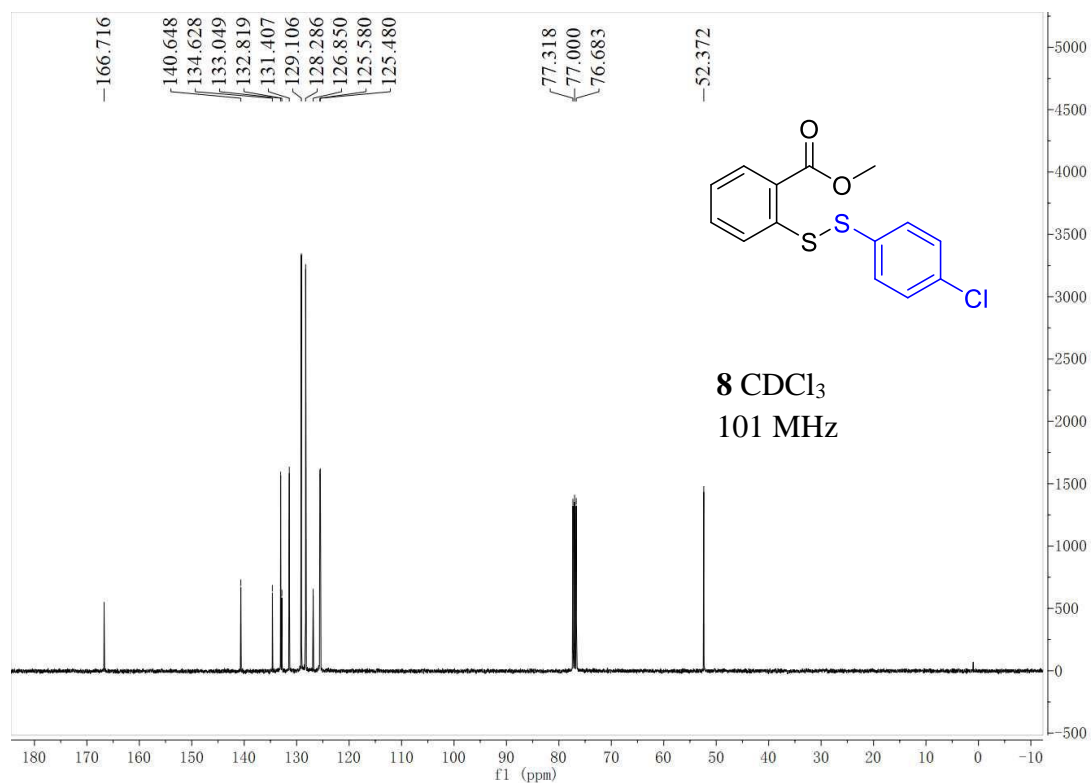

# Supporting Information

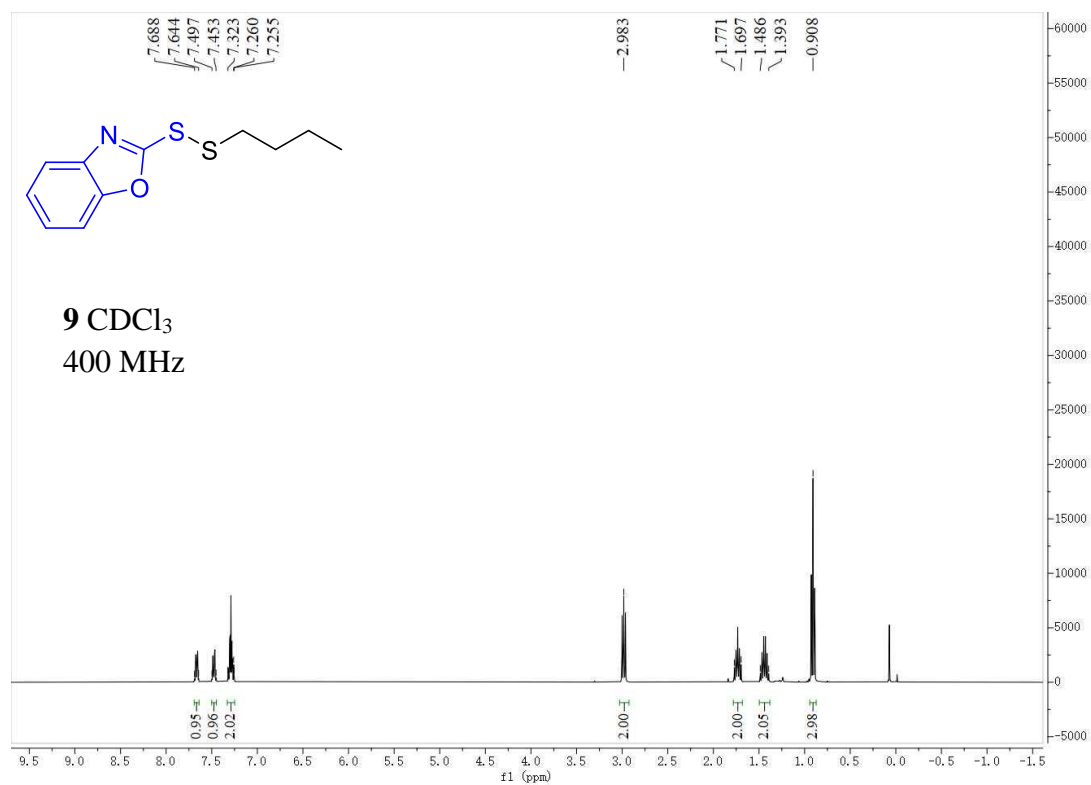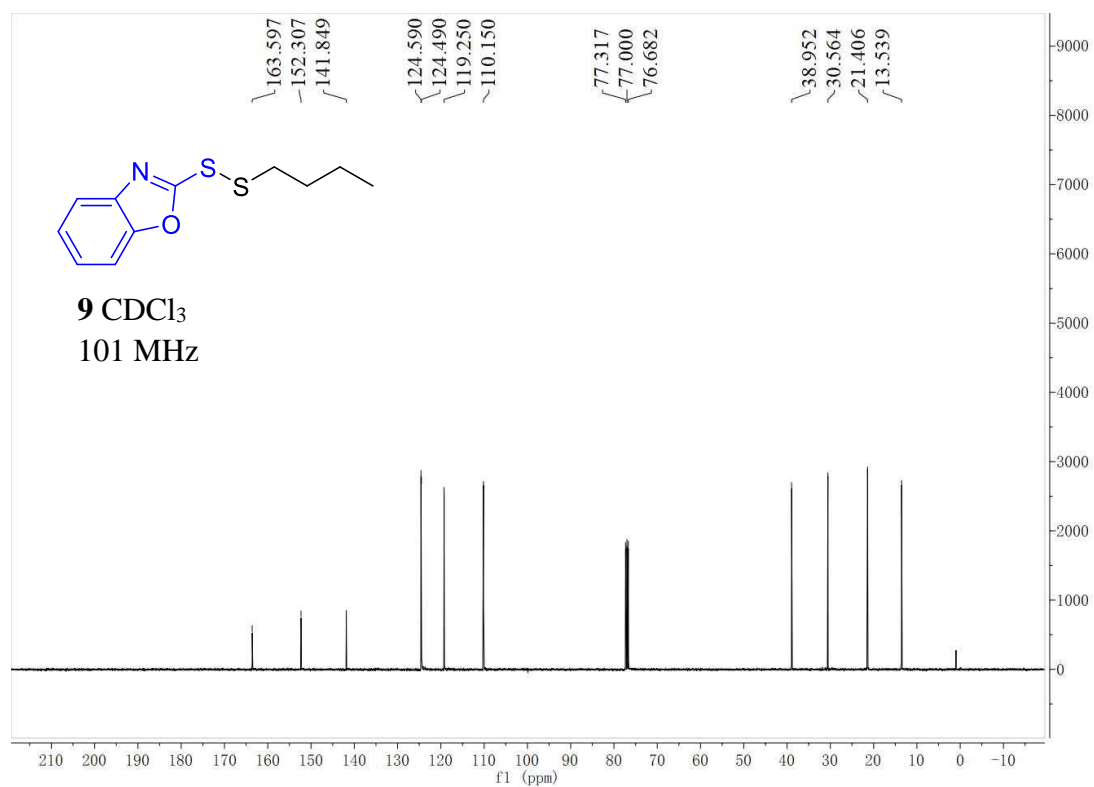

# Supporting Information

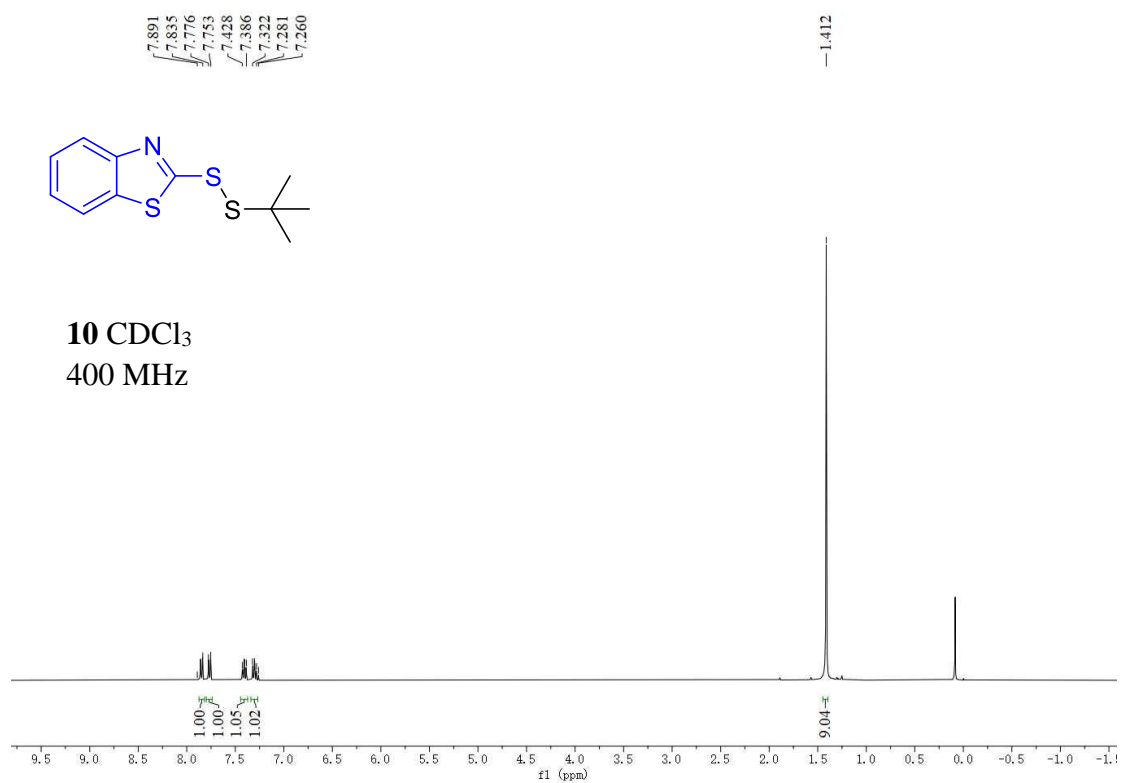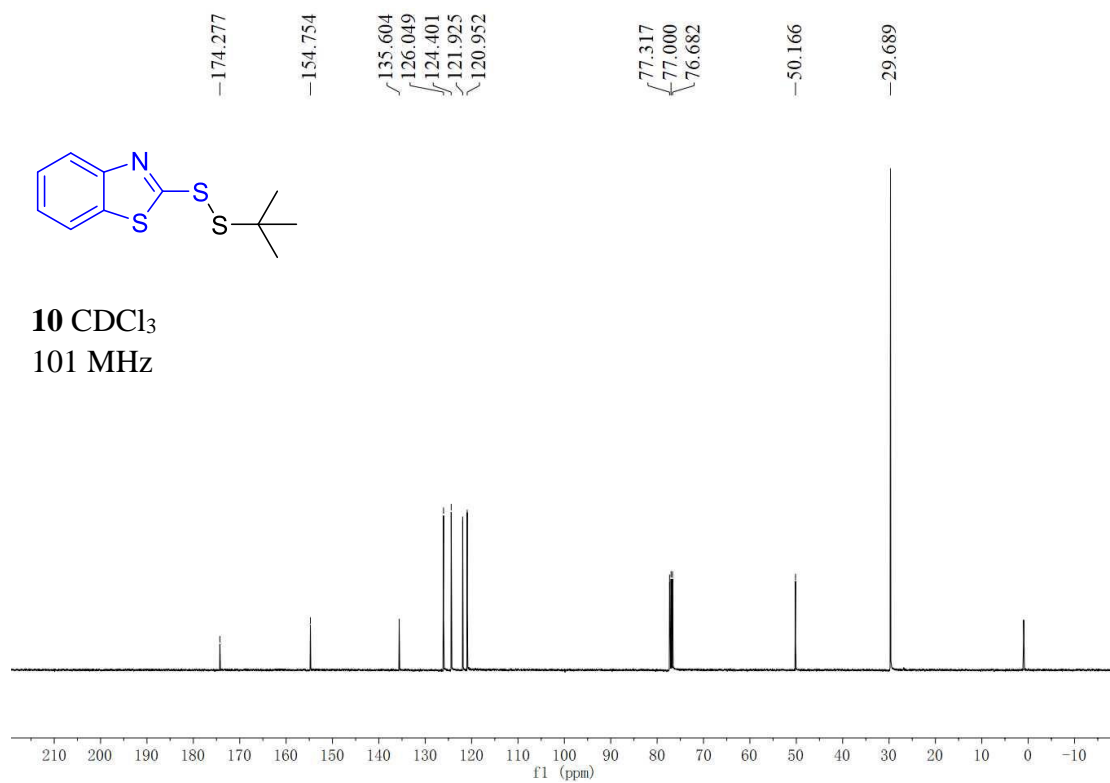

# Supporting Information

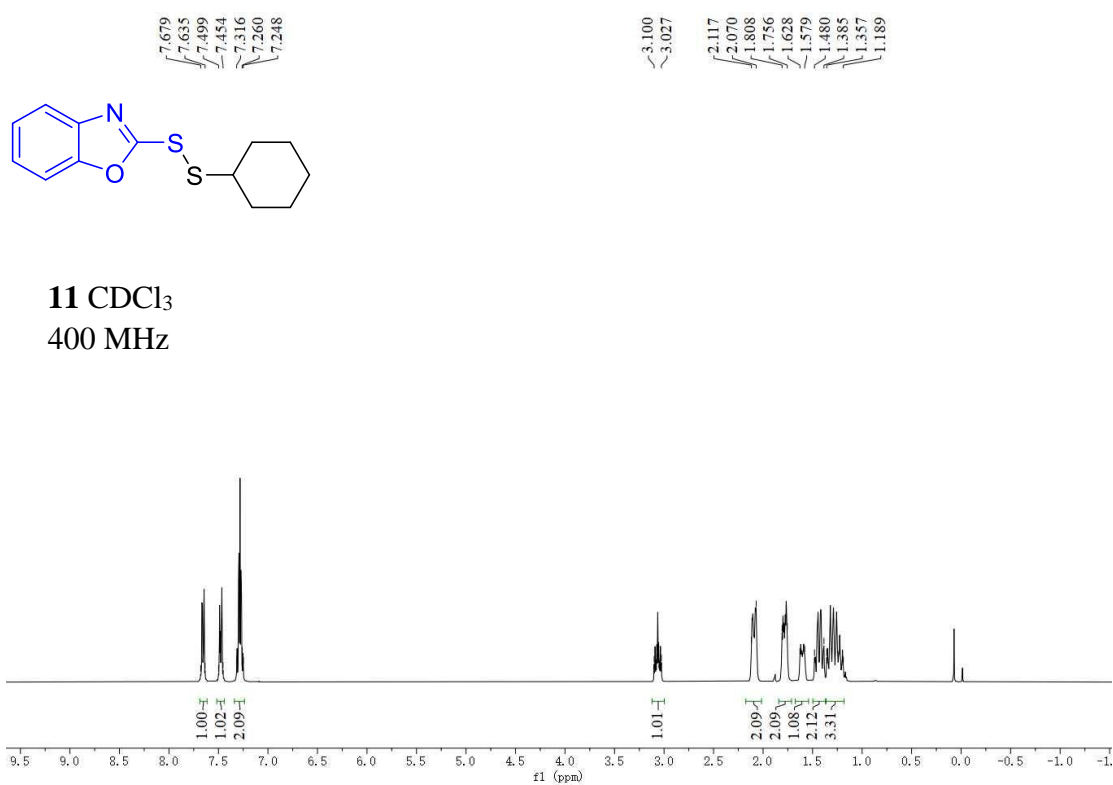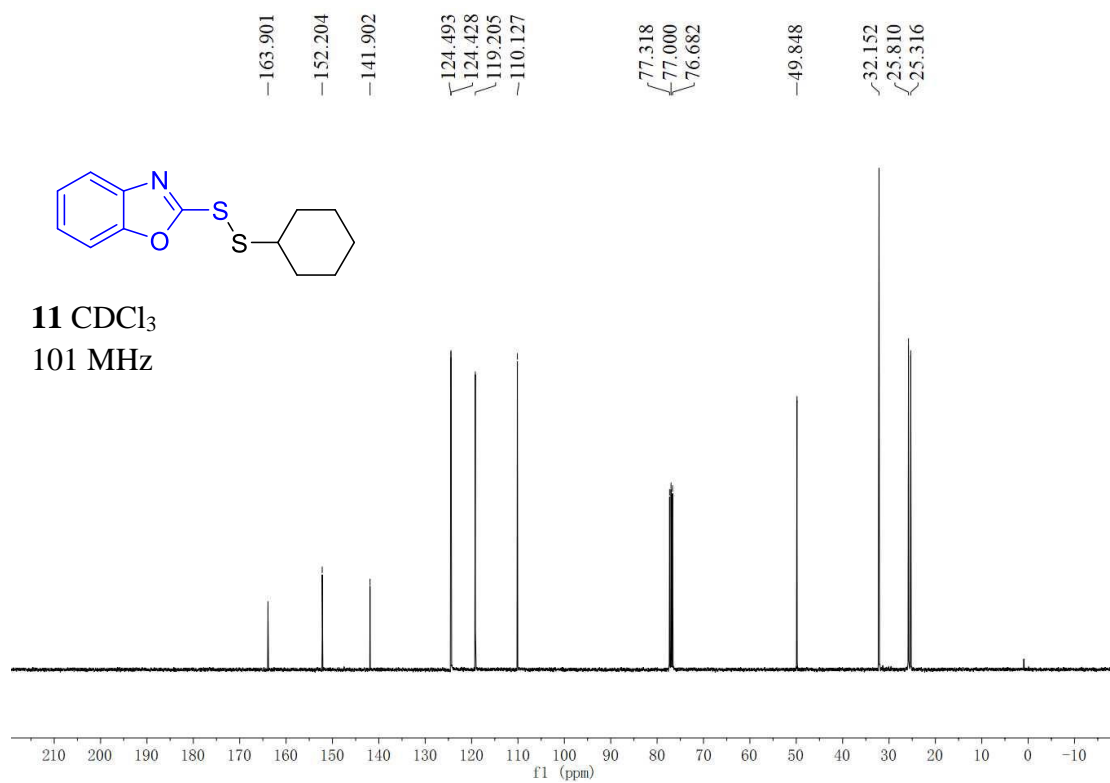

# Supporting Information

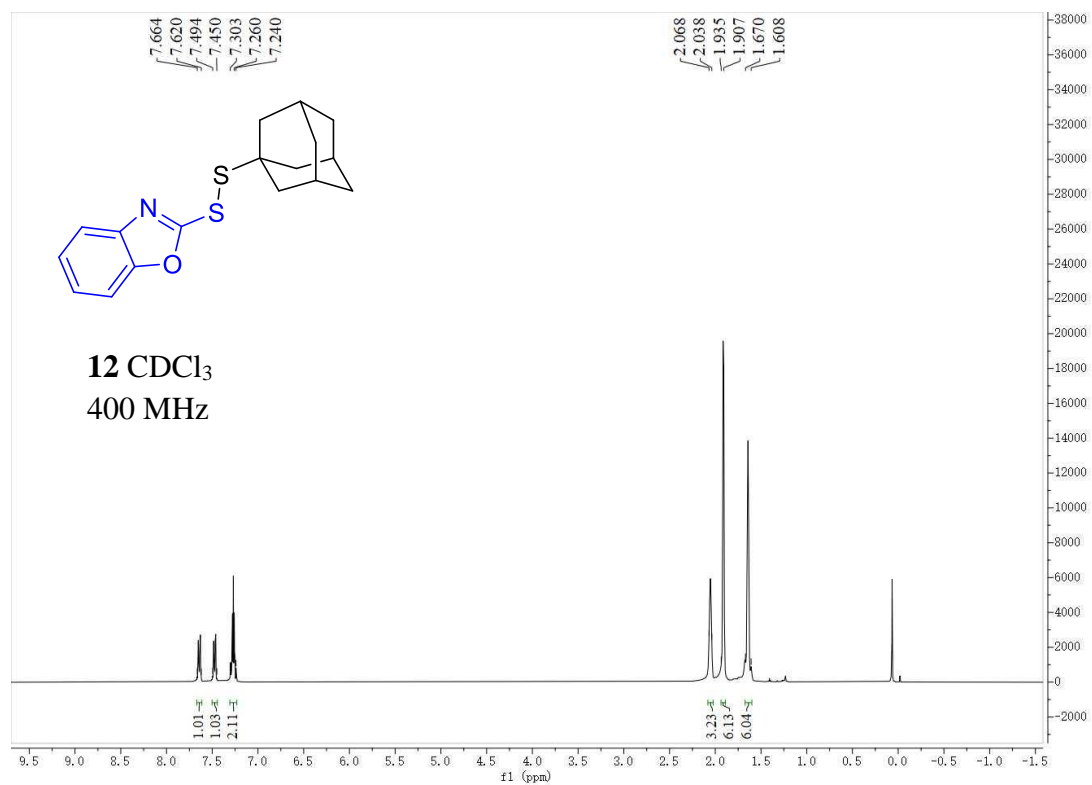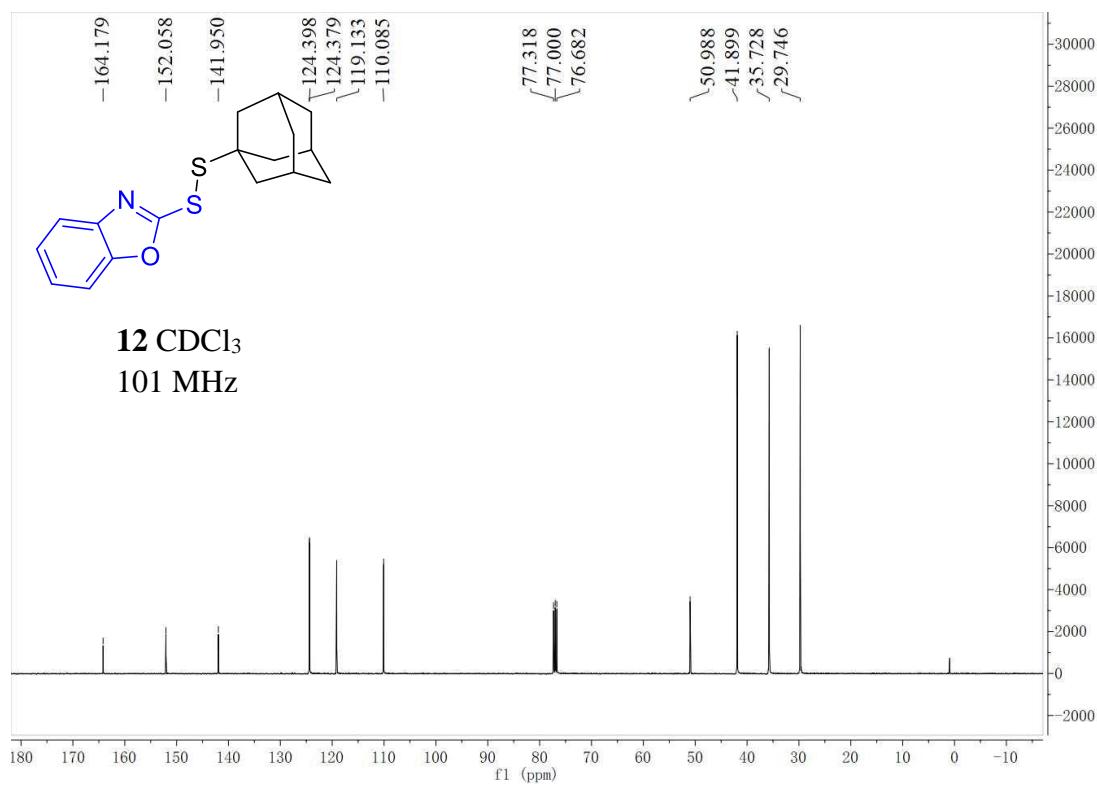

# Supporting Information

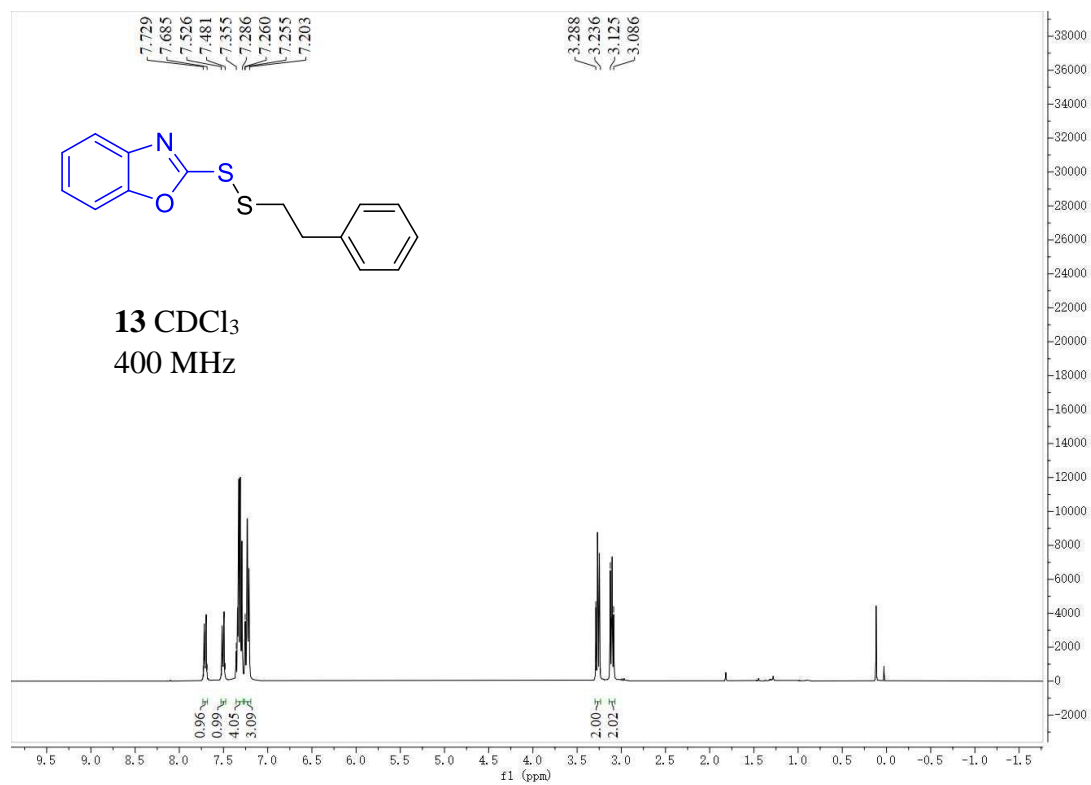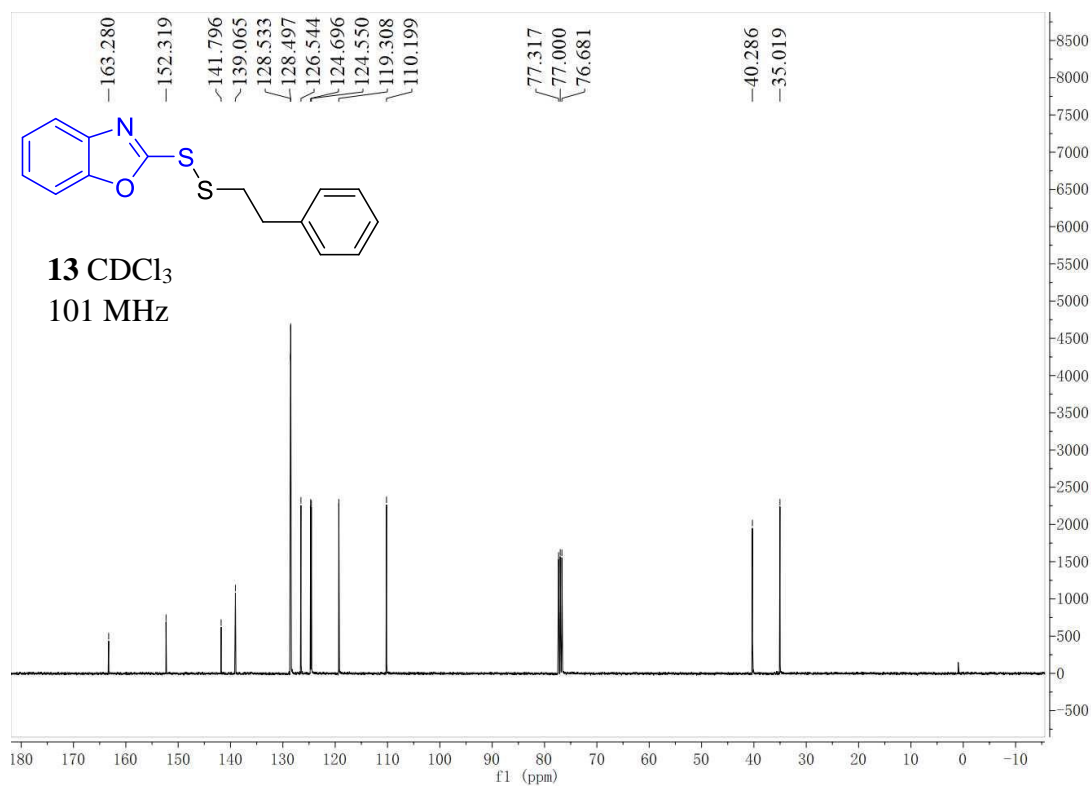



# Supporting Information

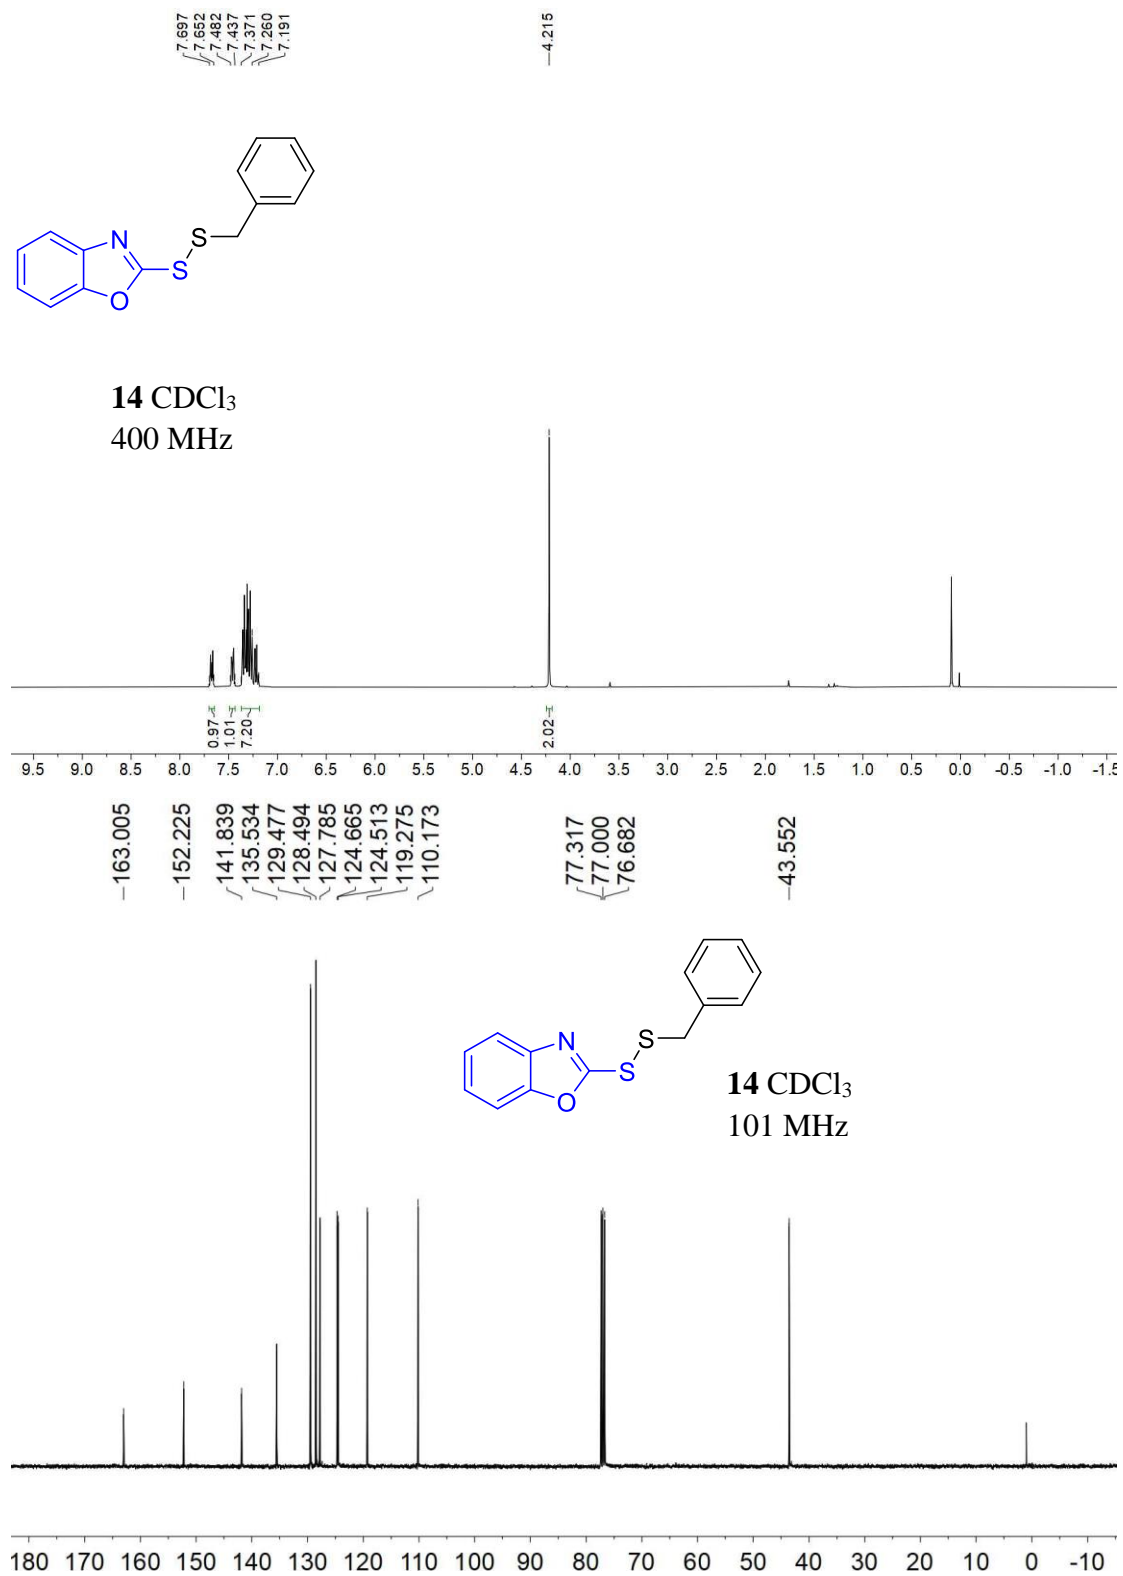

# Supporting Information

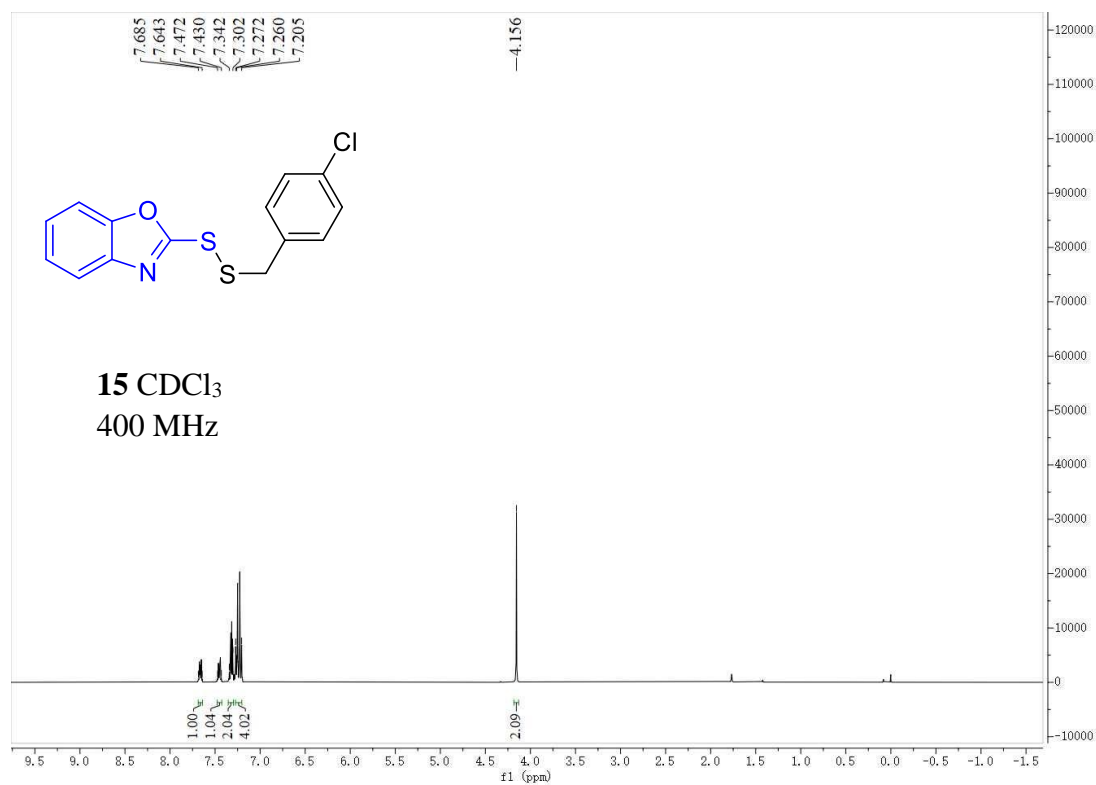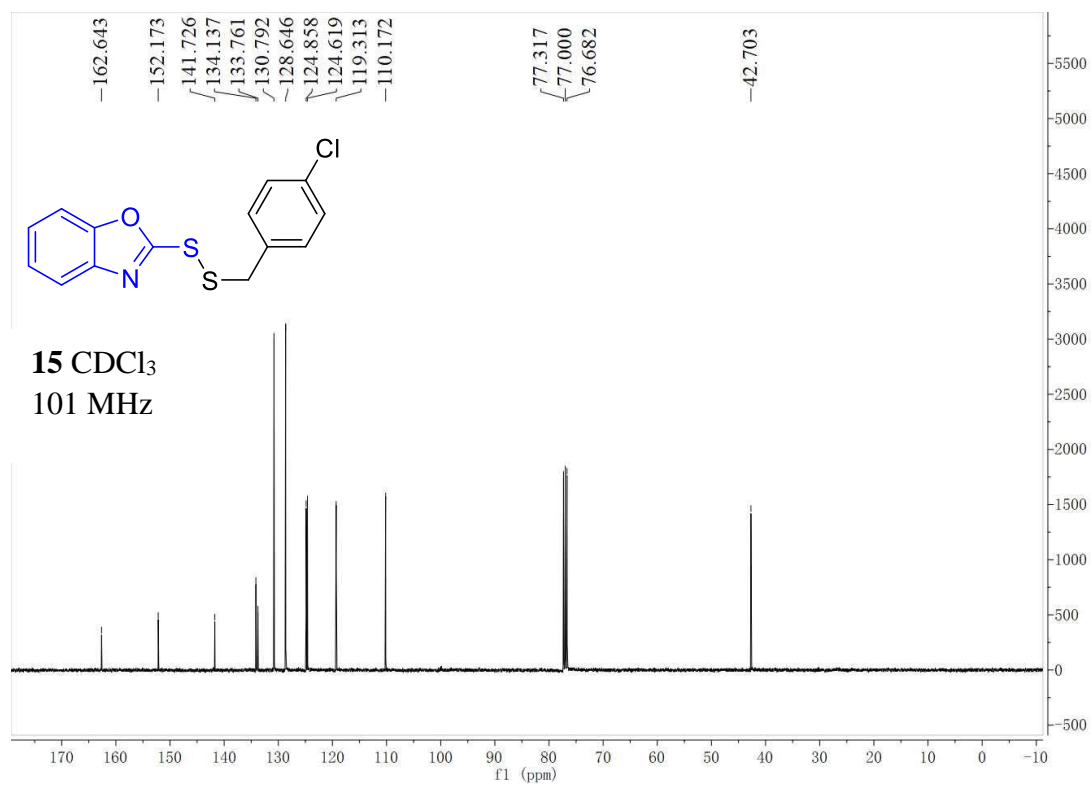

# Supporting Information

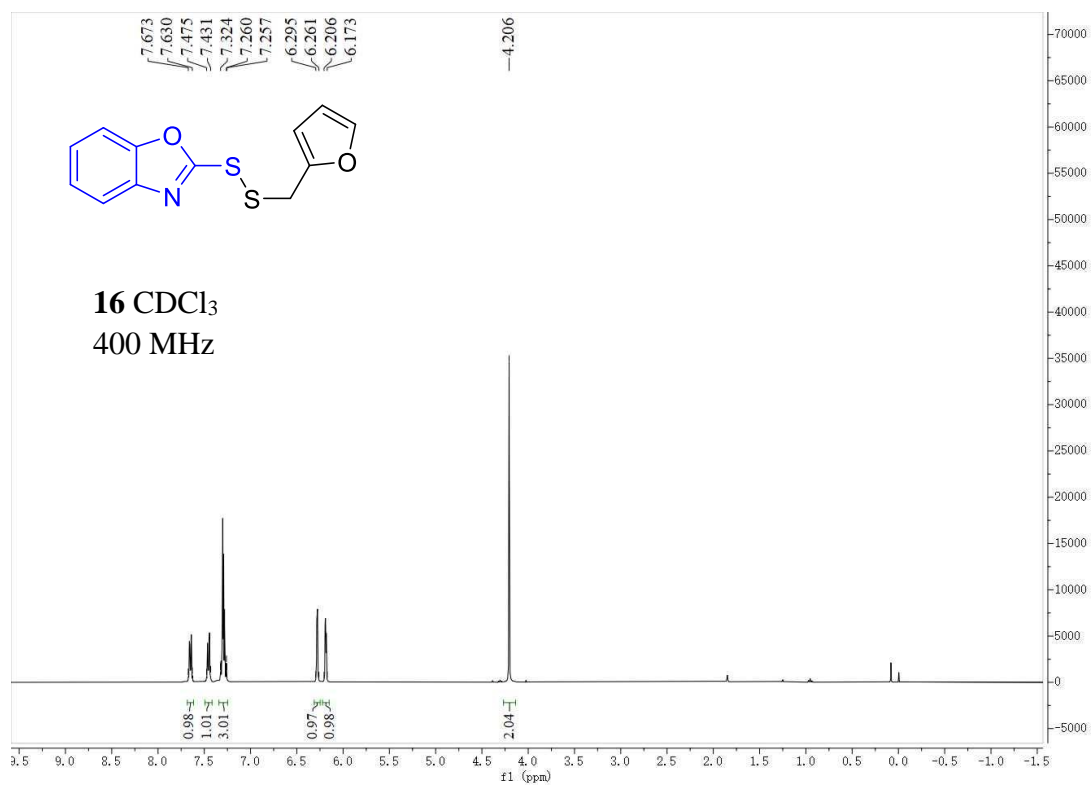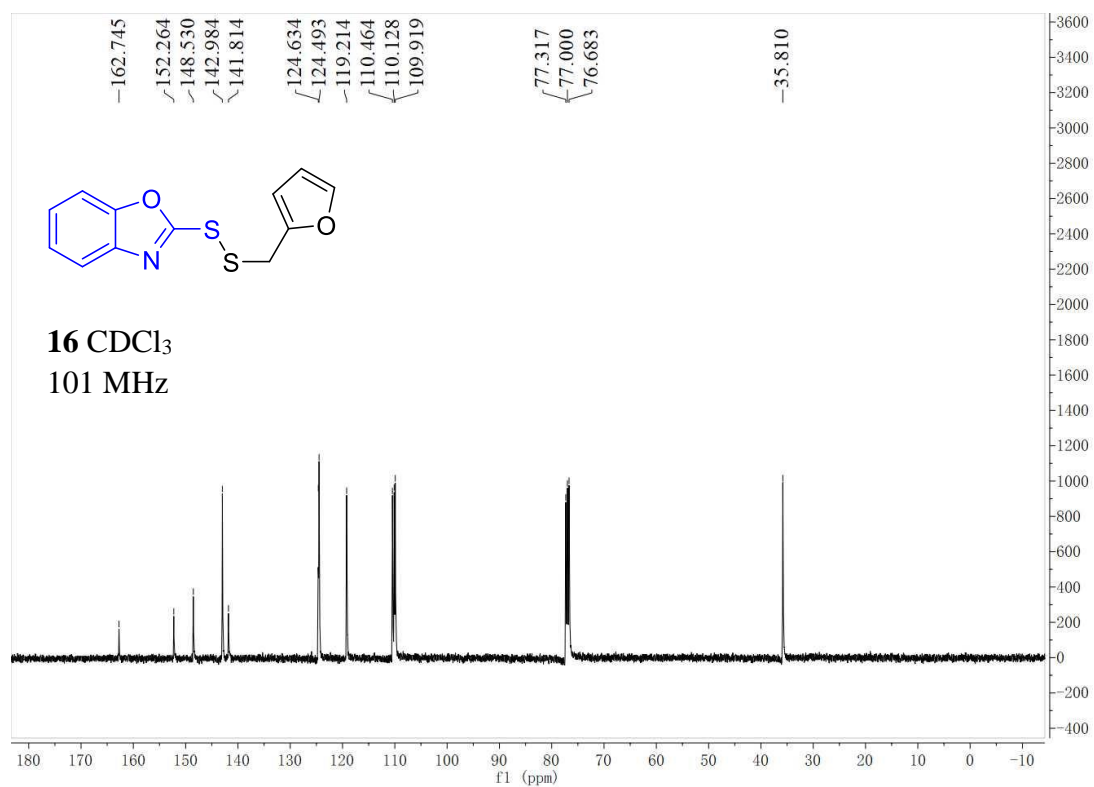

# Supporting Information

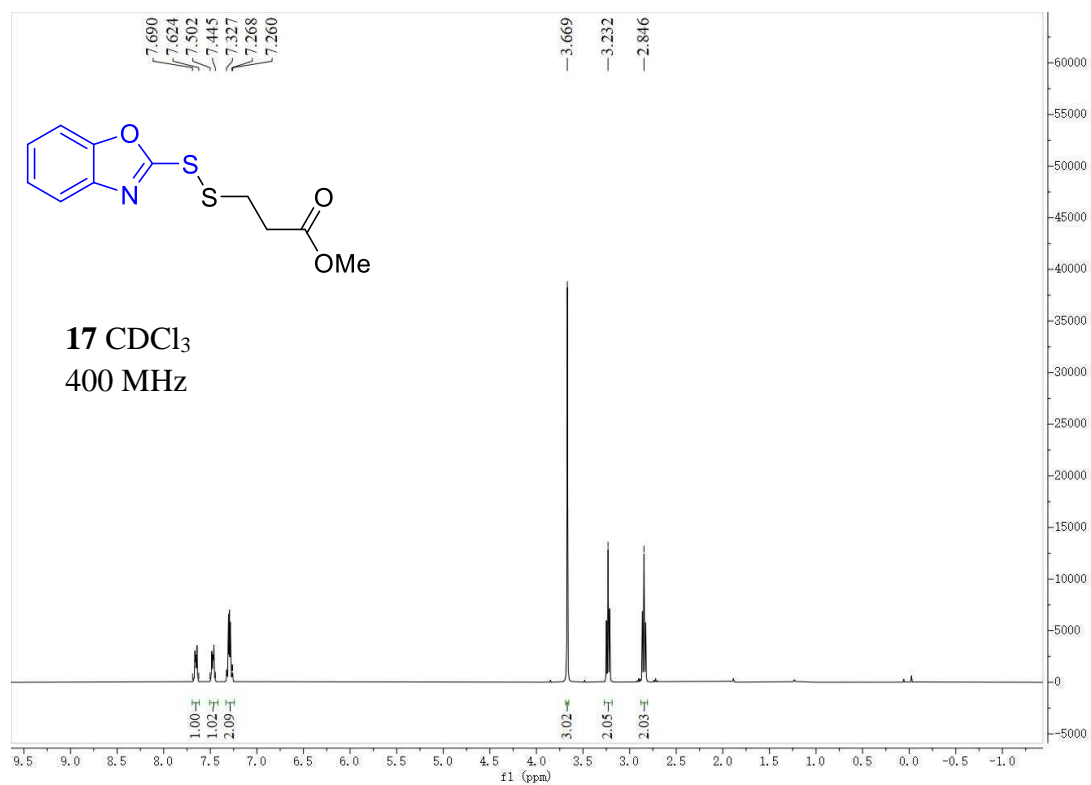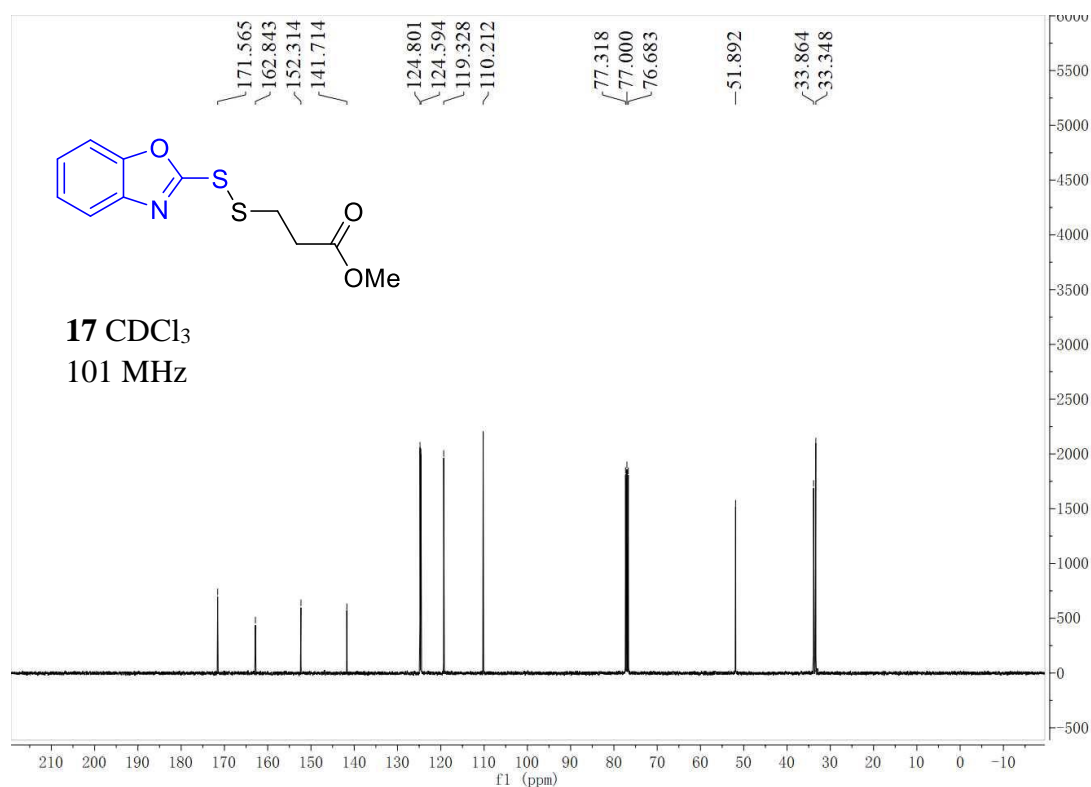

# Supporting Information

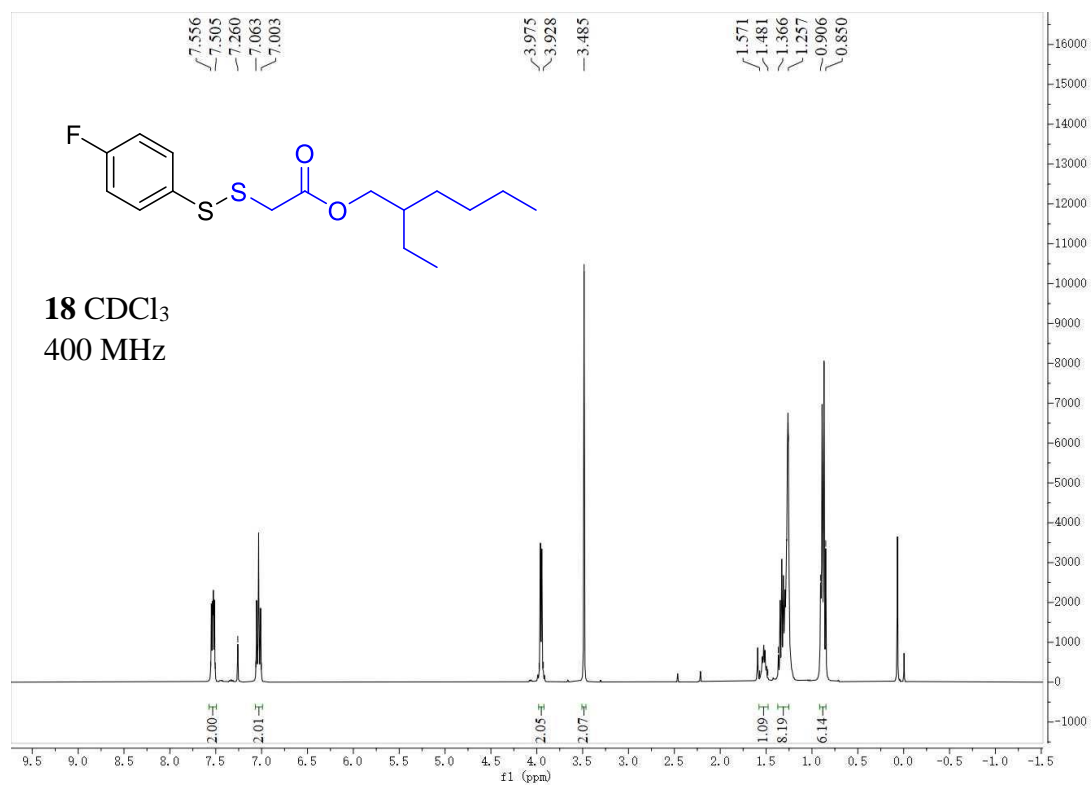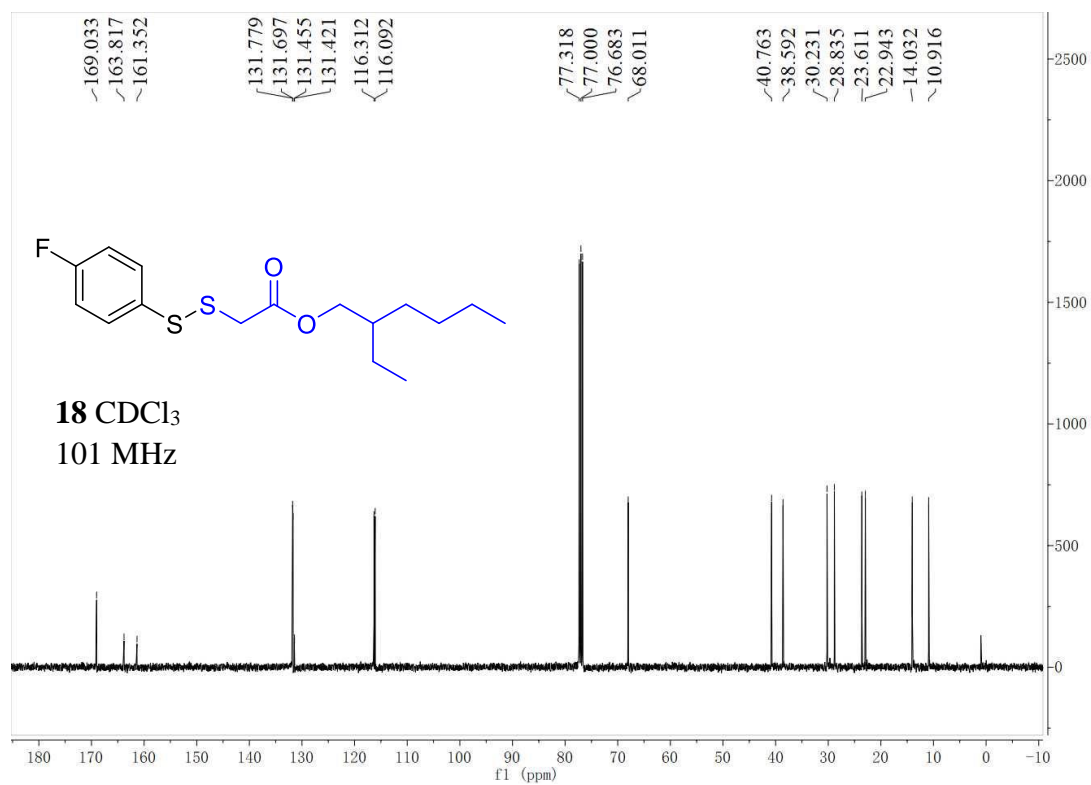

## Supporting Information

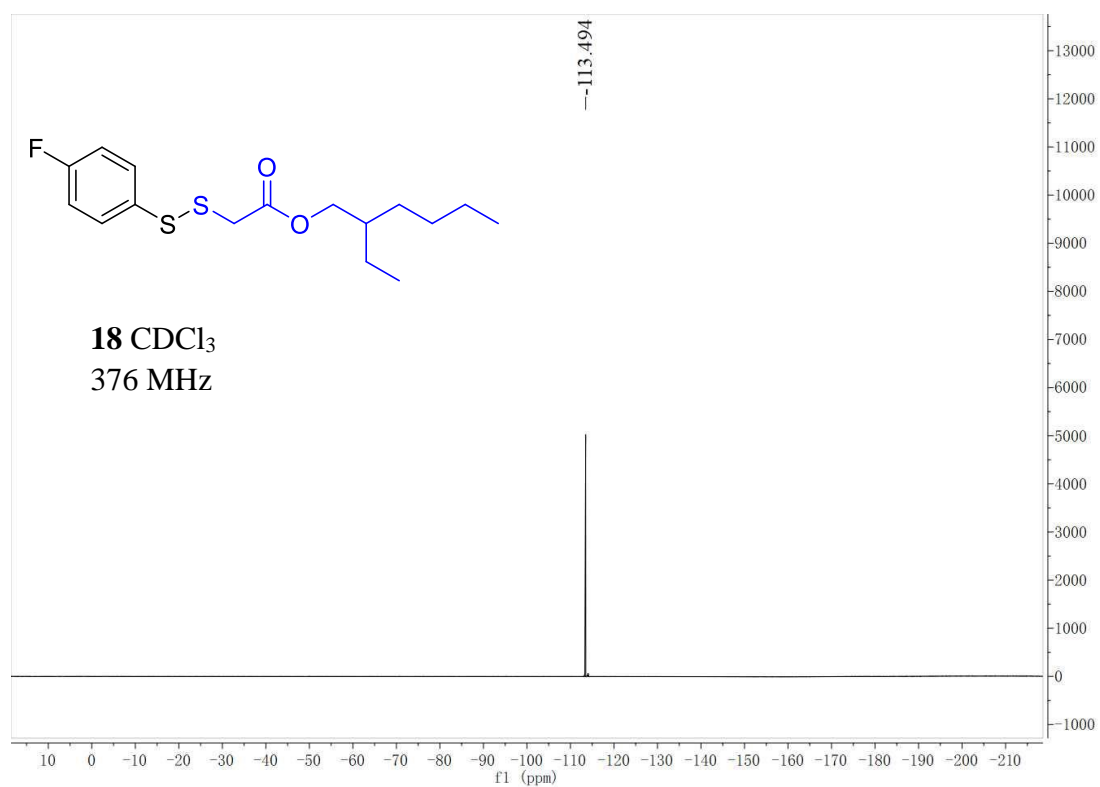

# Supporting Information

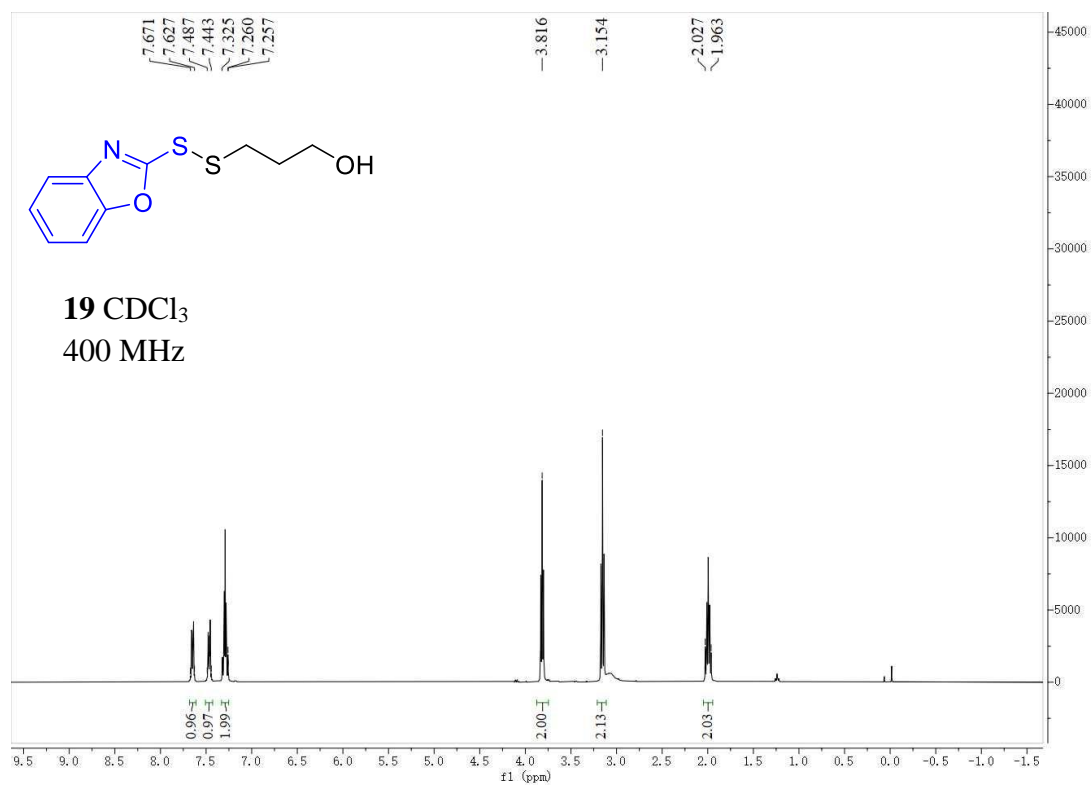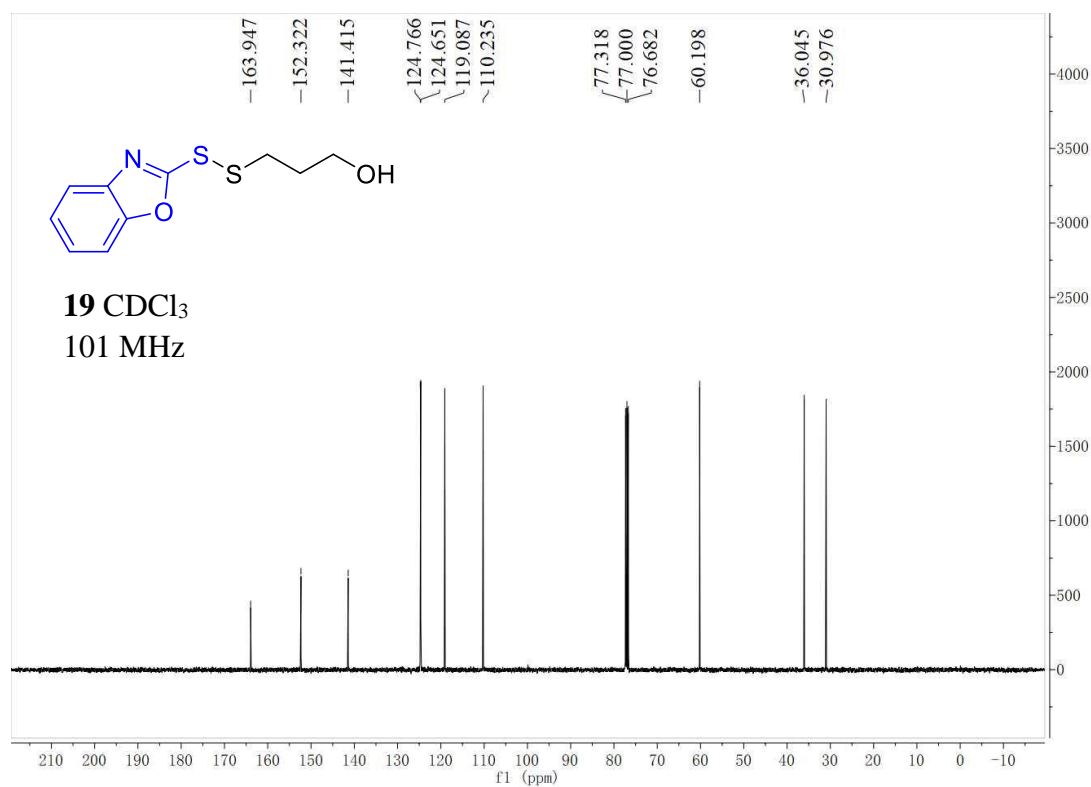

# Supporting Information

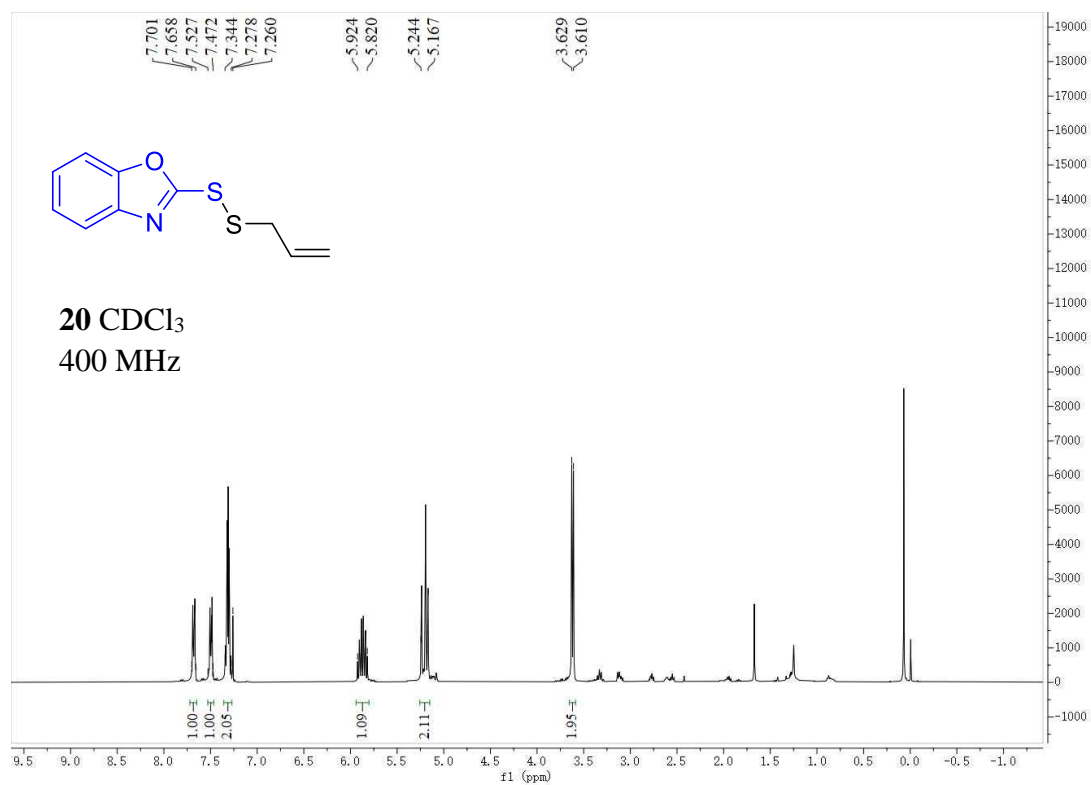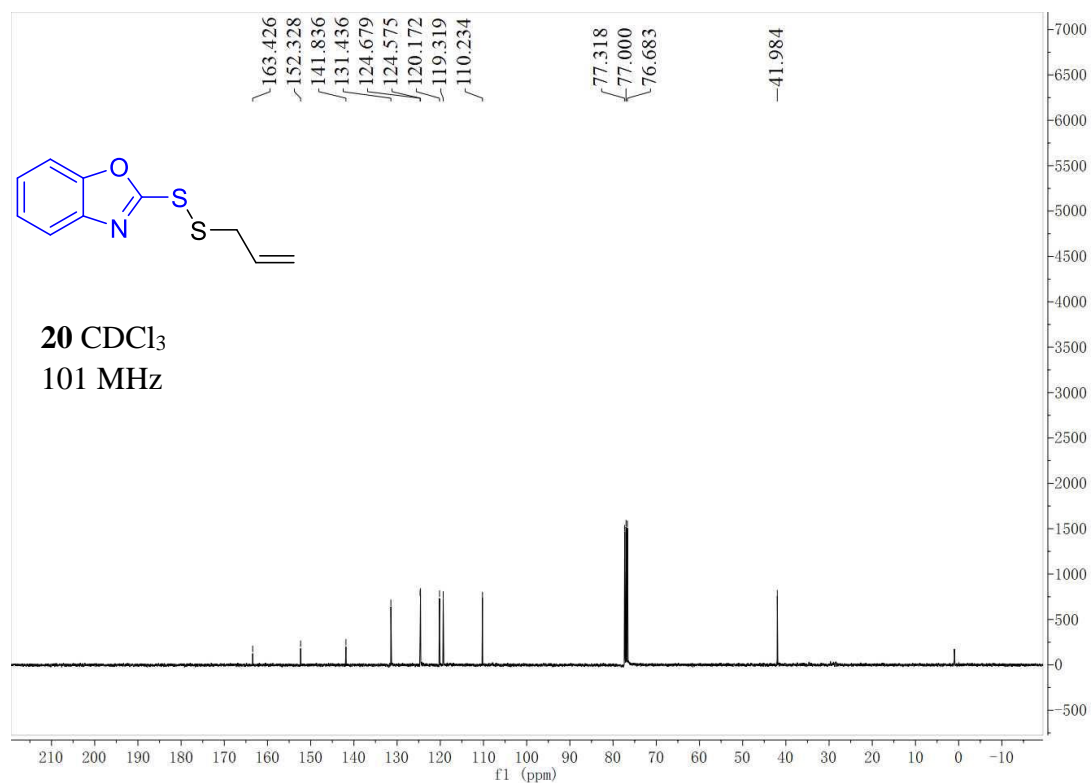



# Supporting Information

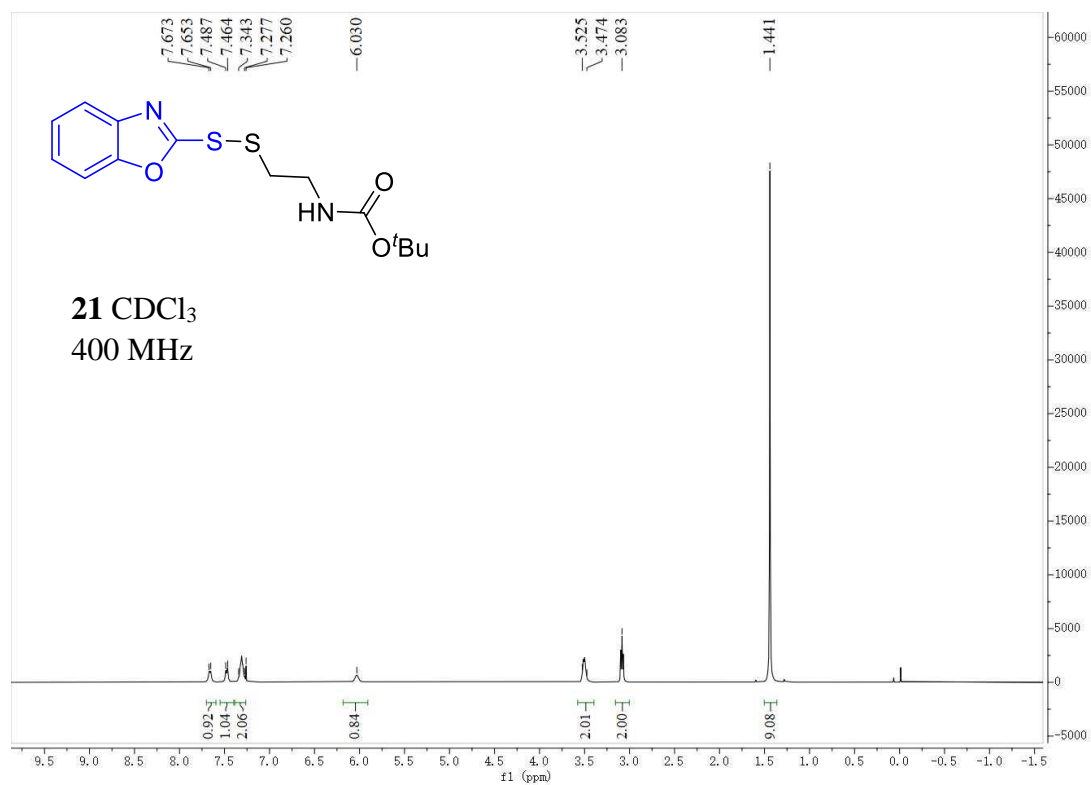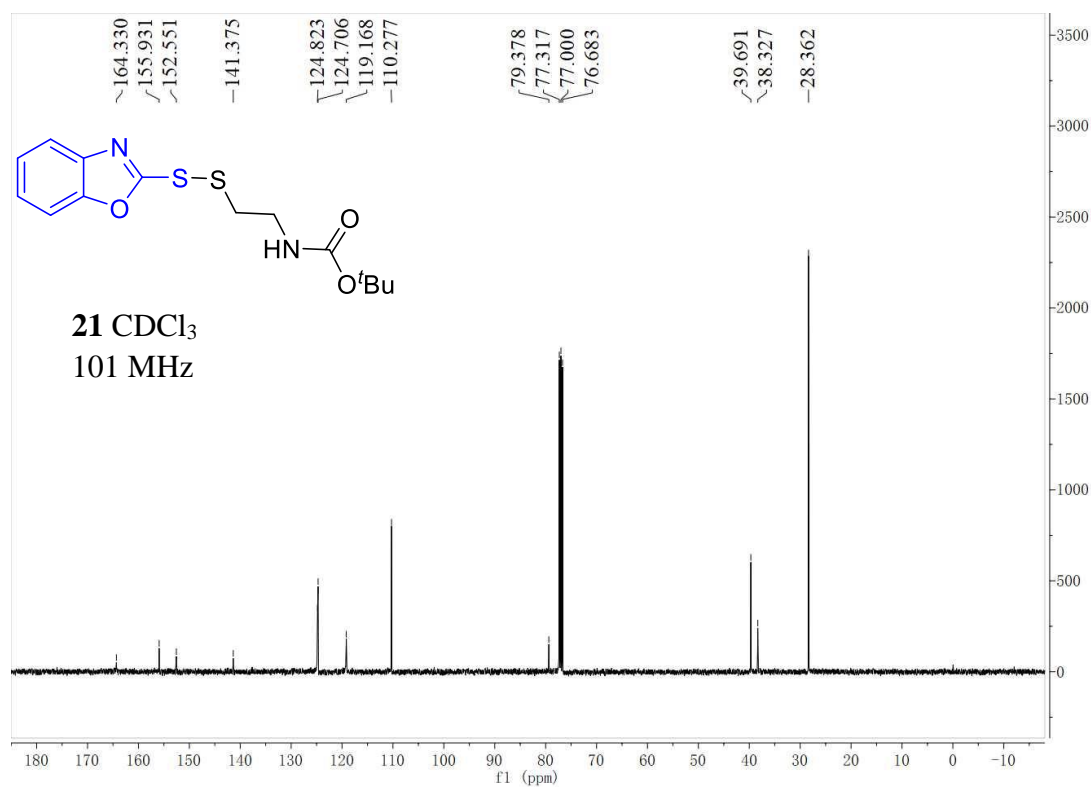

# Supporting Information

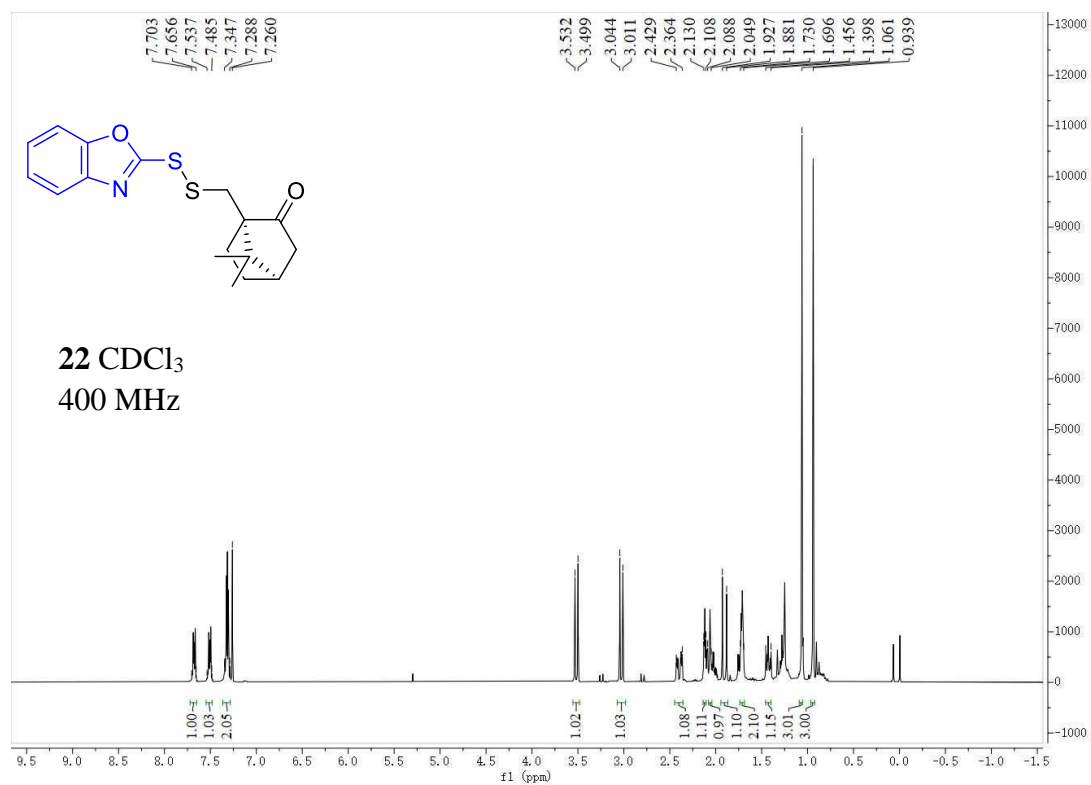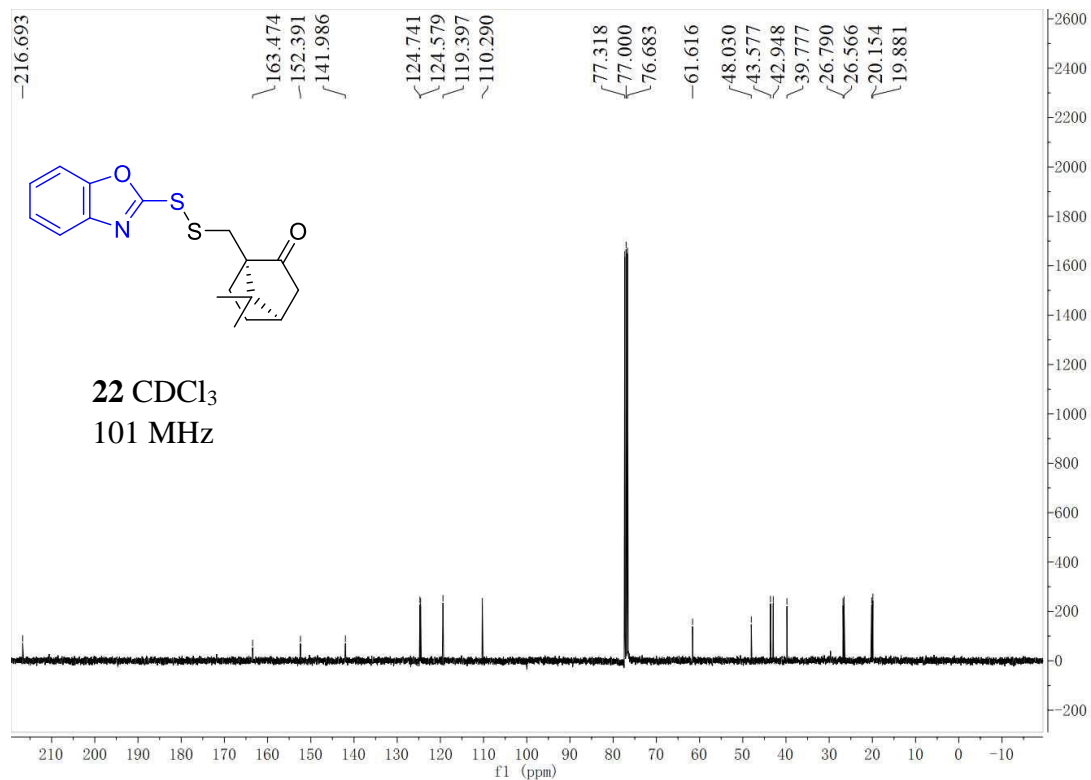

# Supporting Information

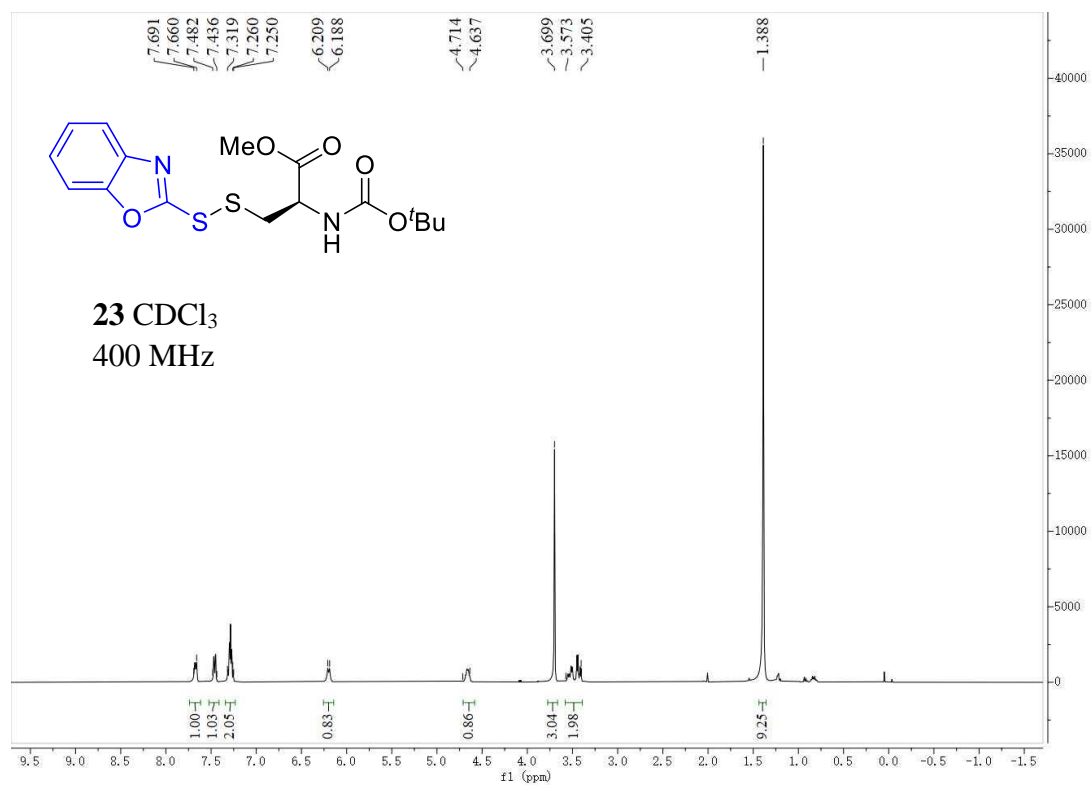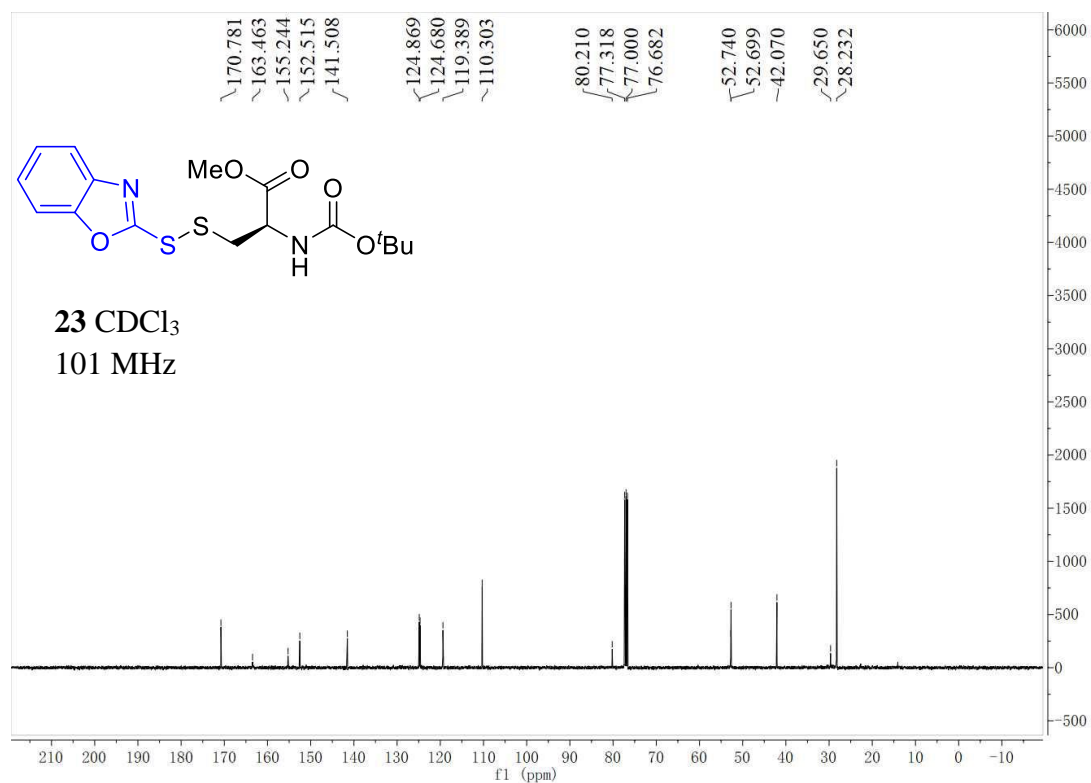

# Supporting Information

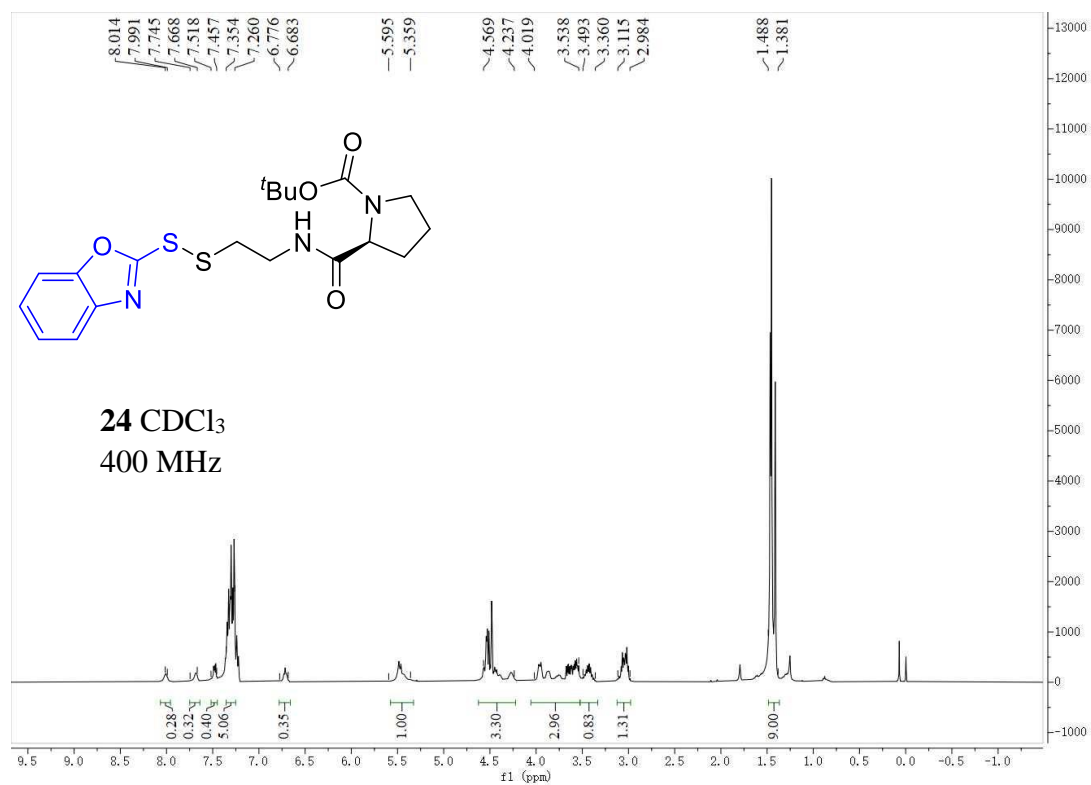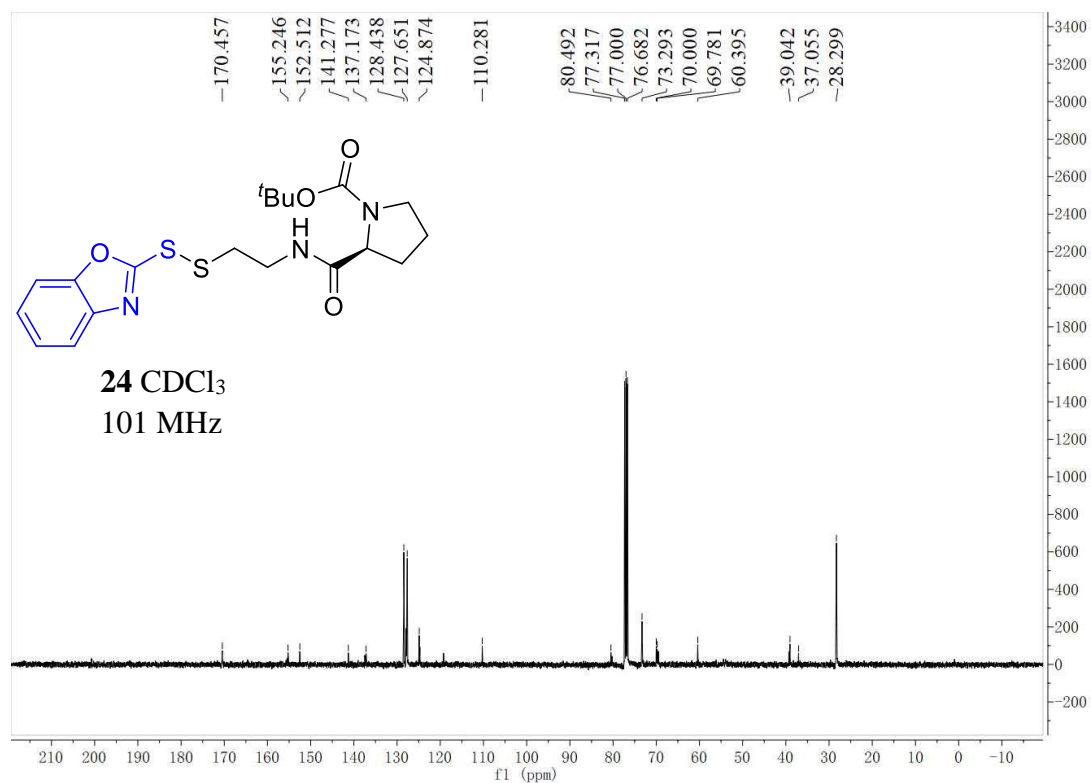

# Supporting Information

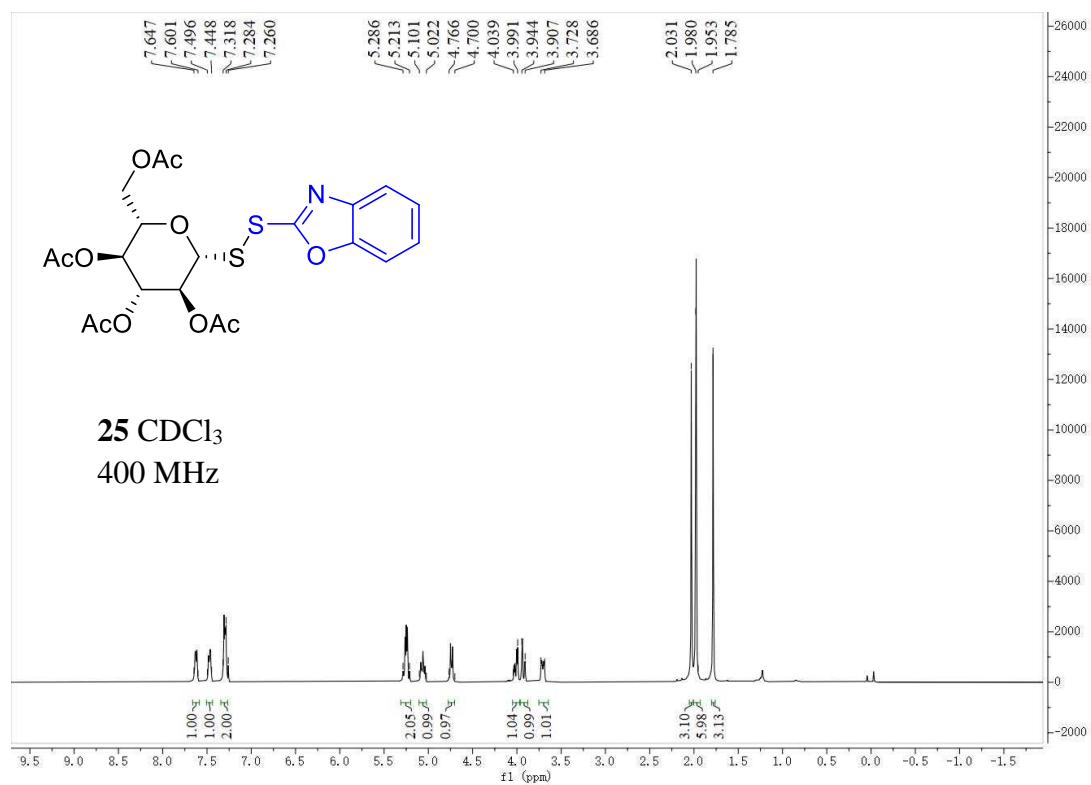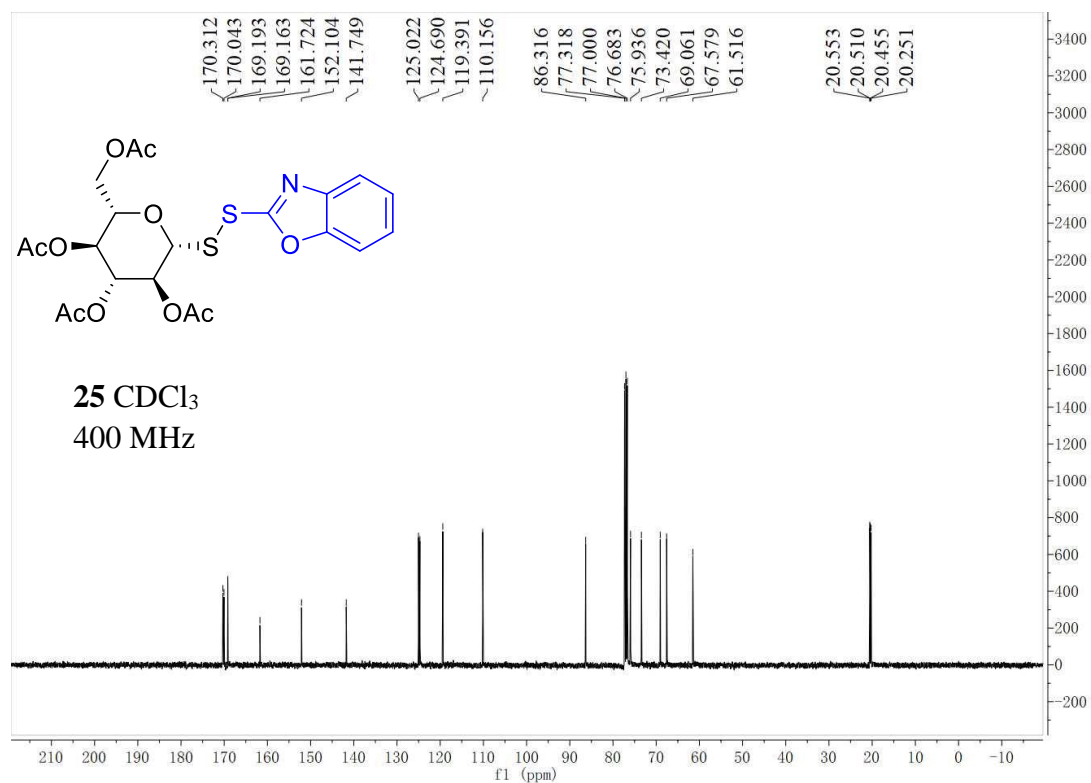

# Supporting Information

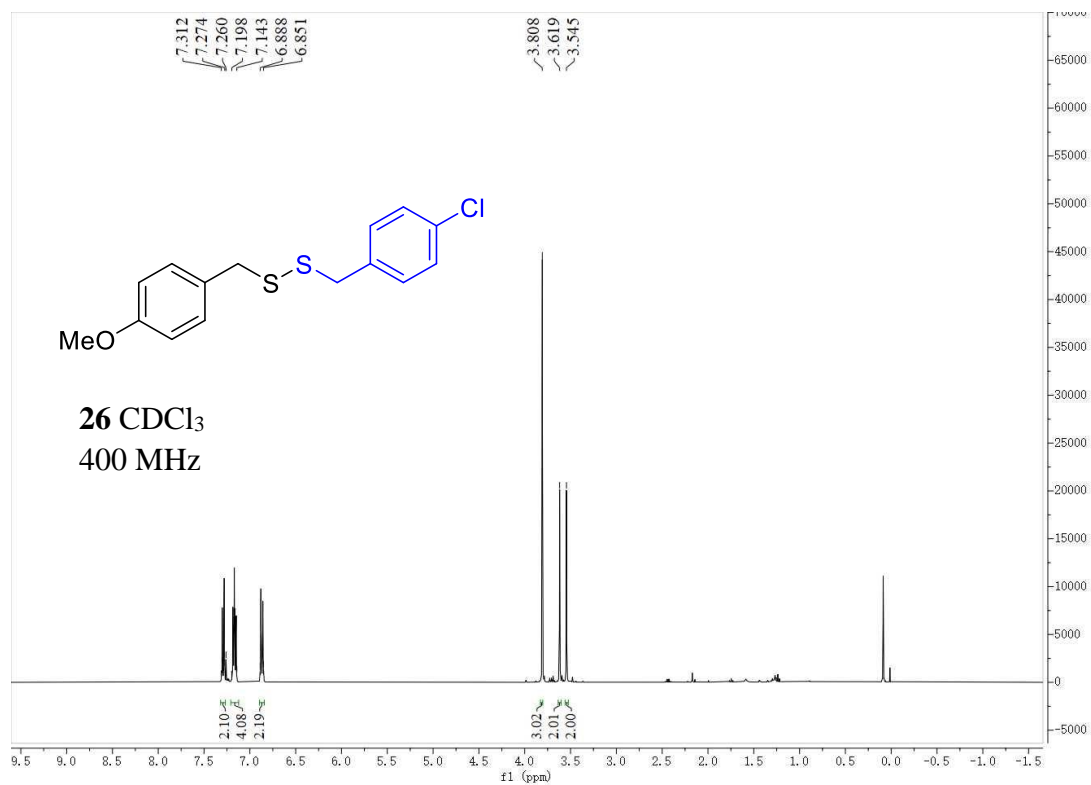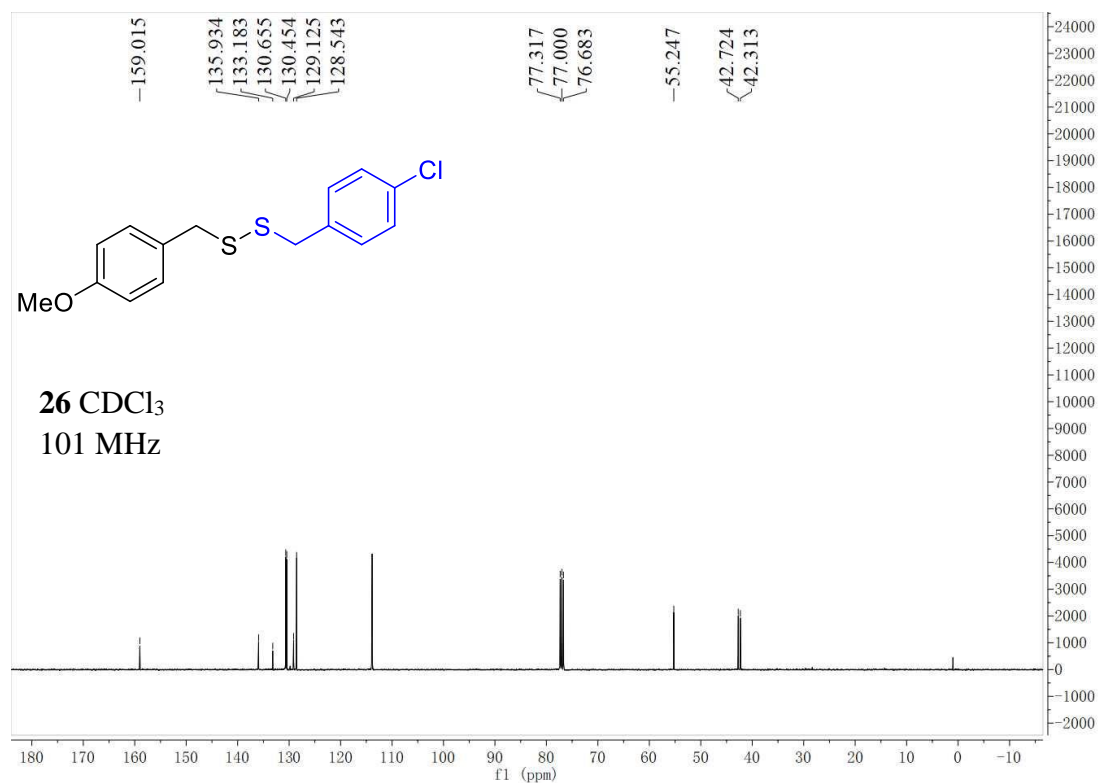

# Supporting Information

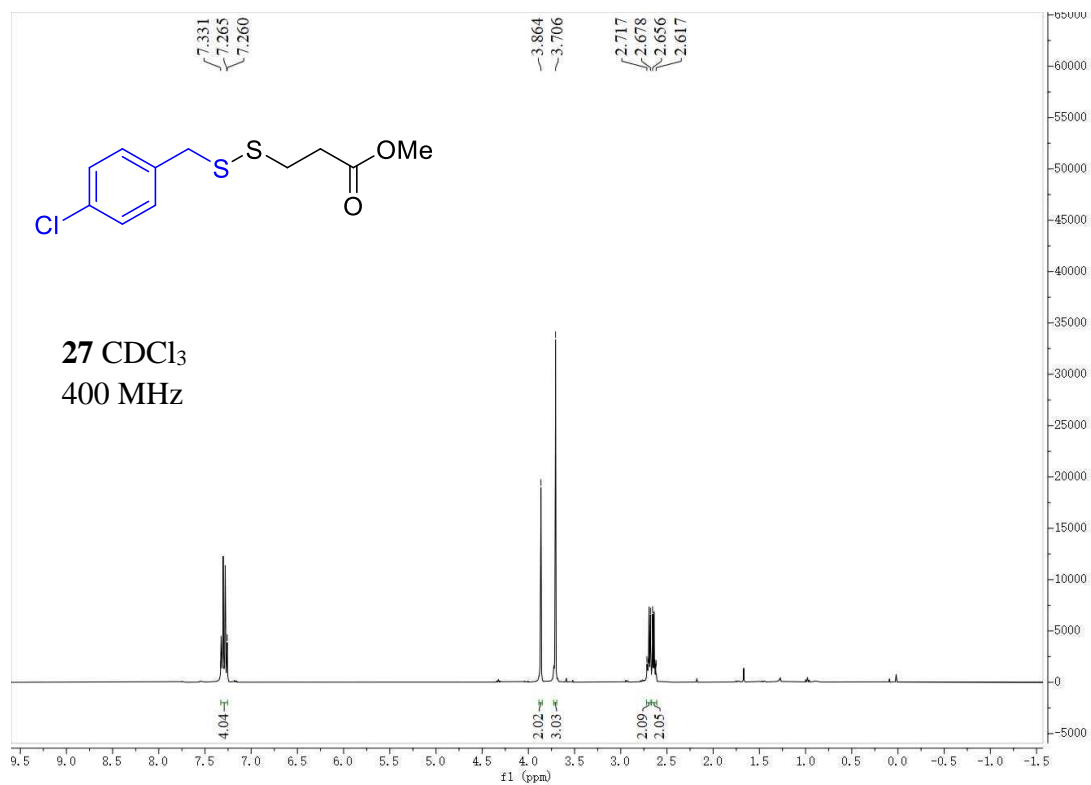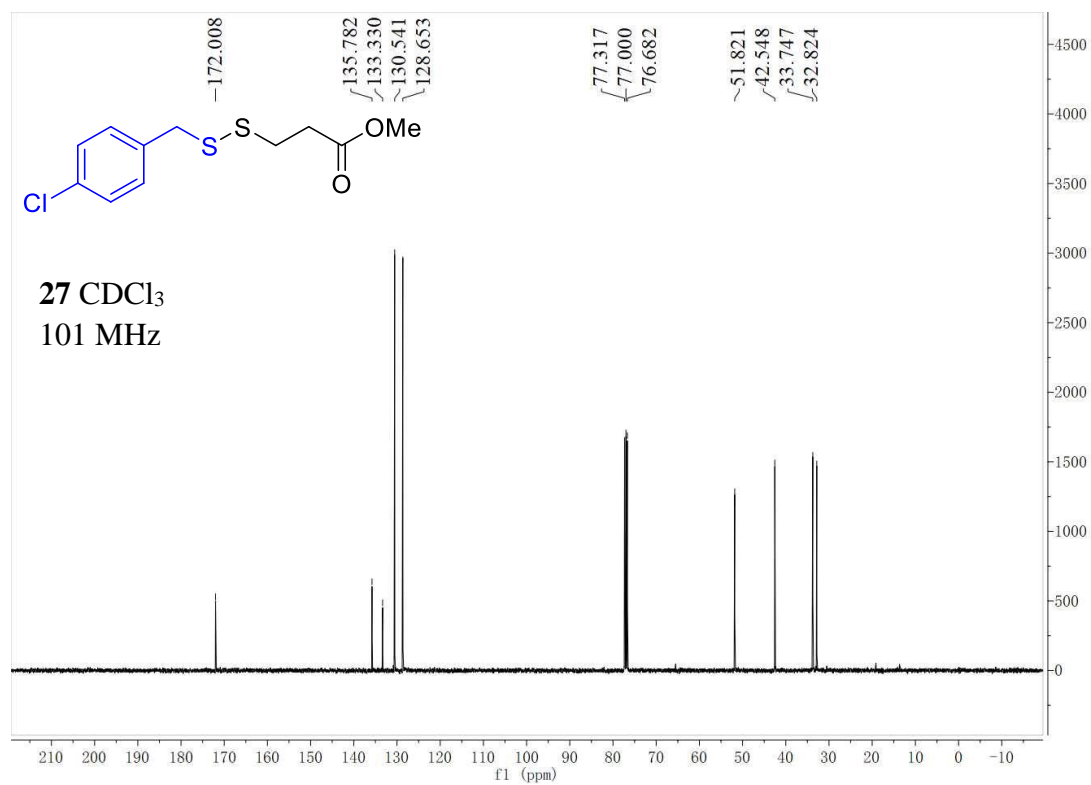

# Supporting Information

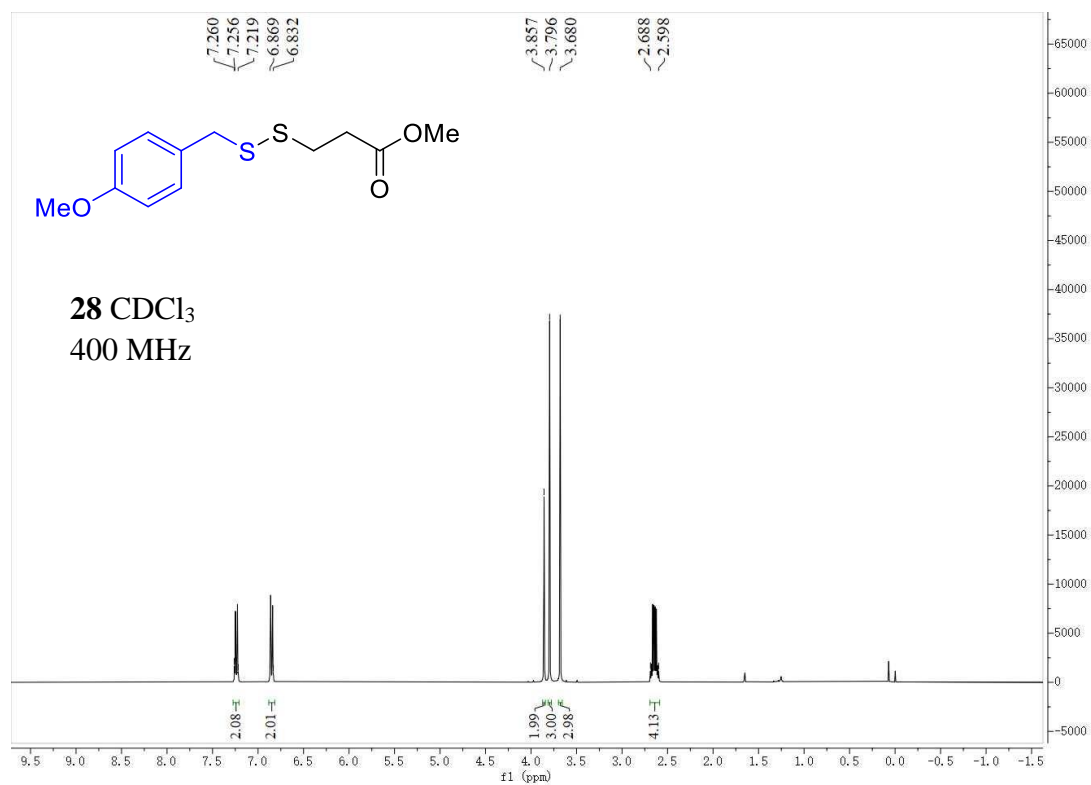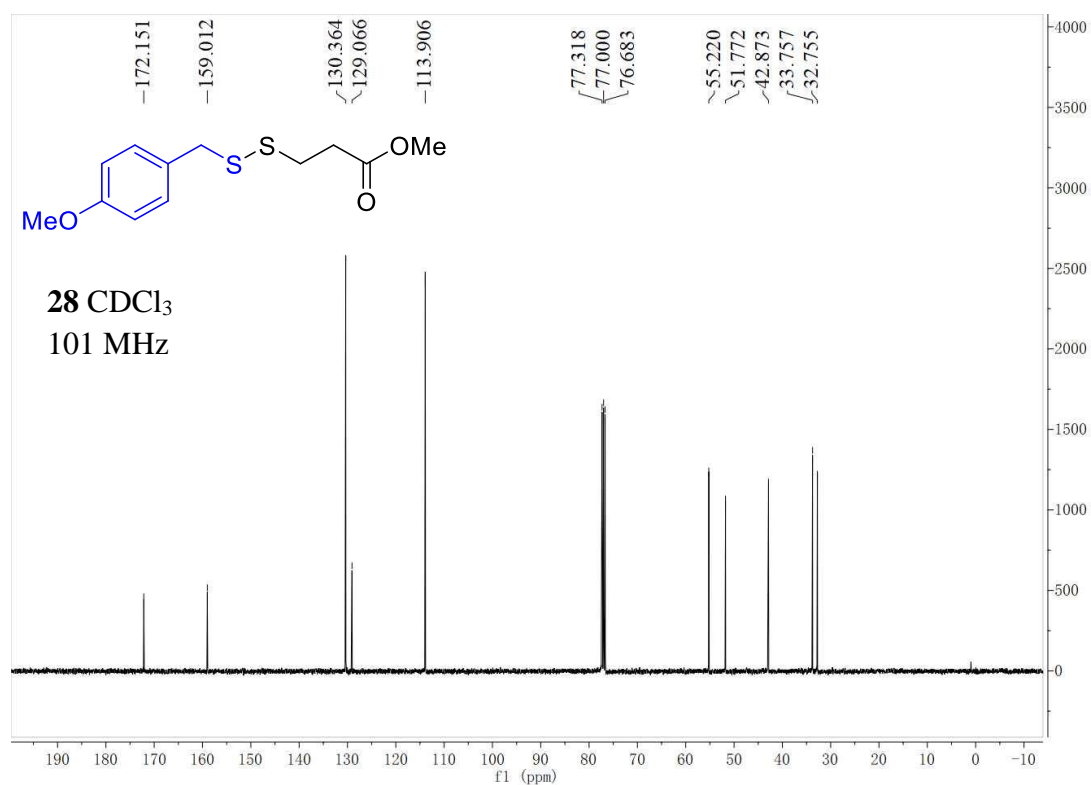



# Supporting Information

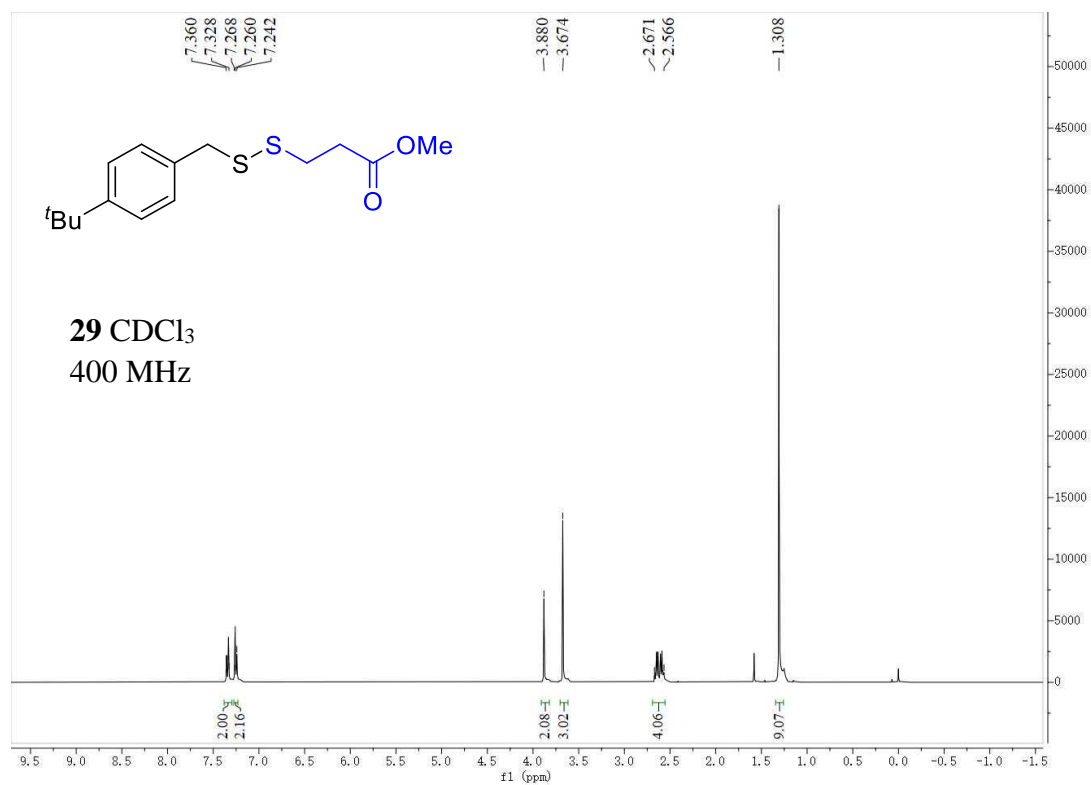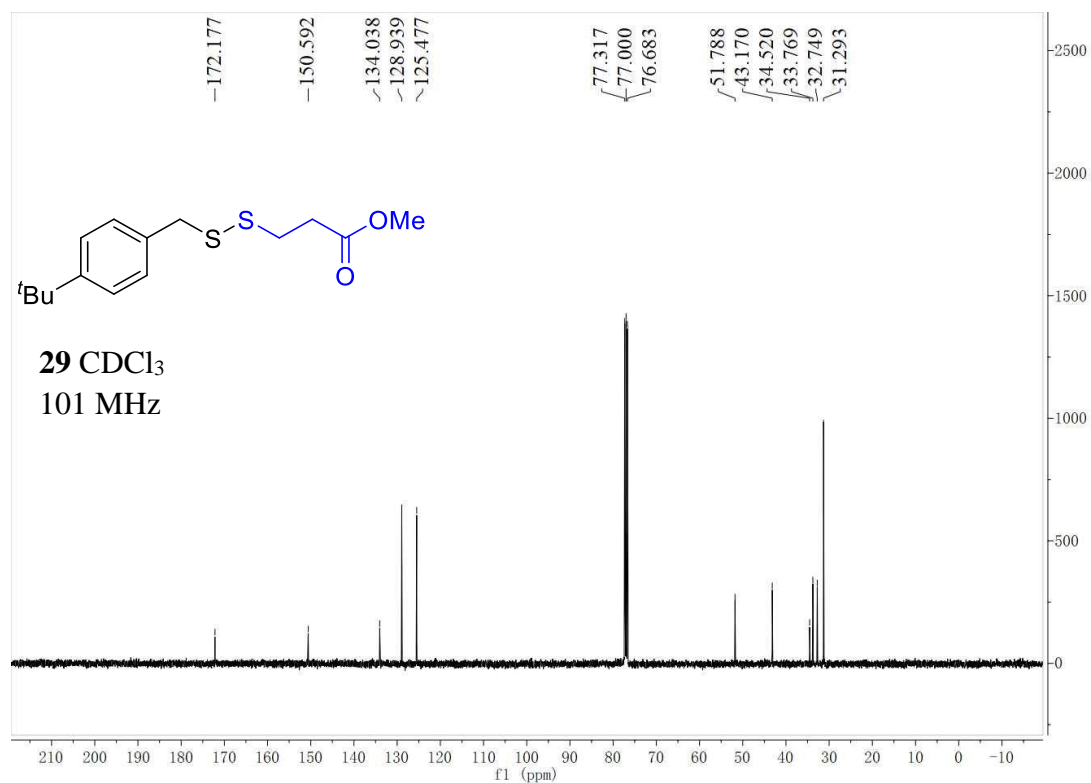

# Supporting Information

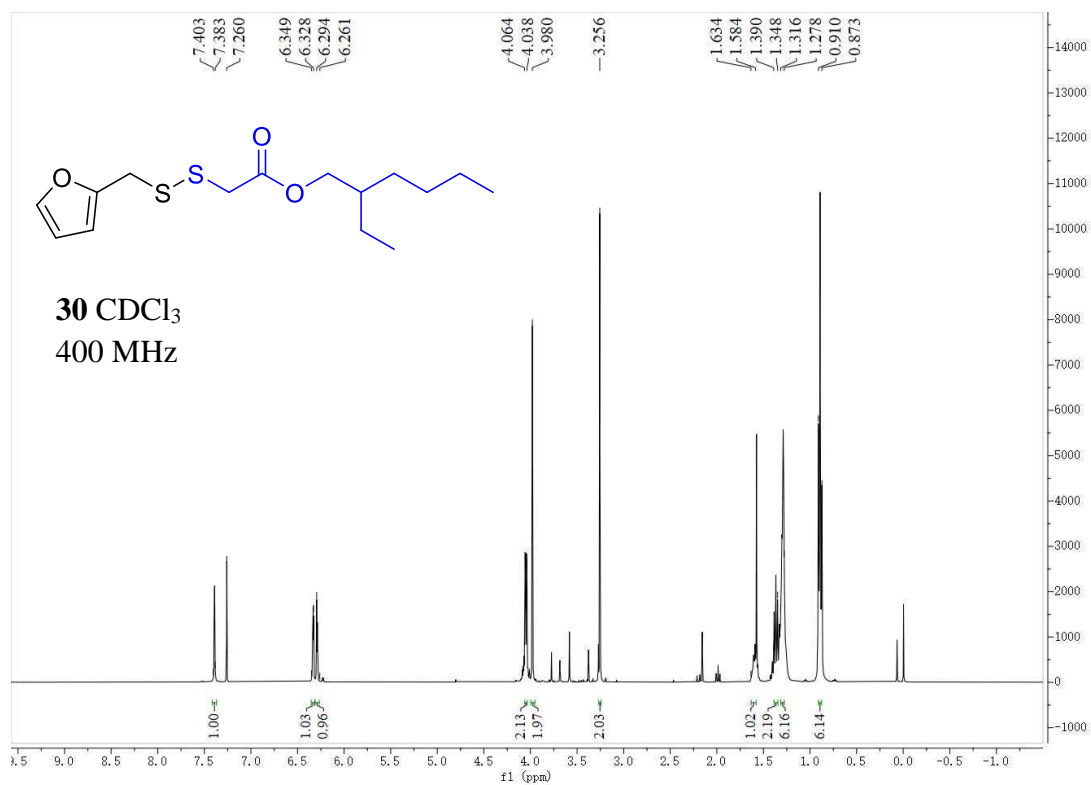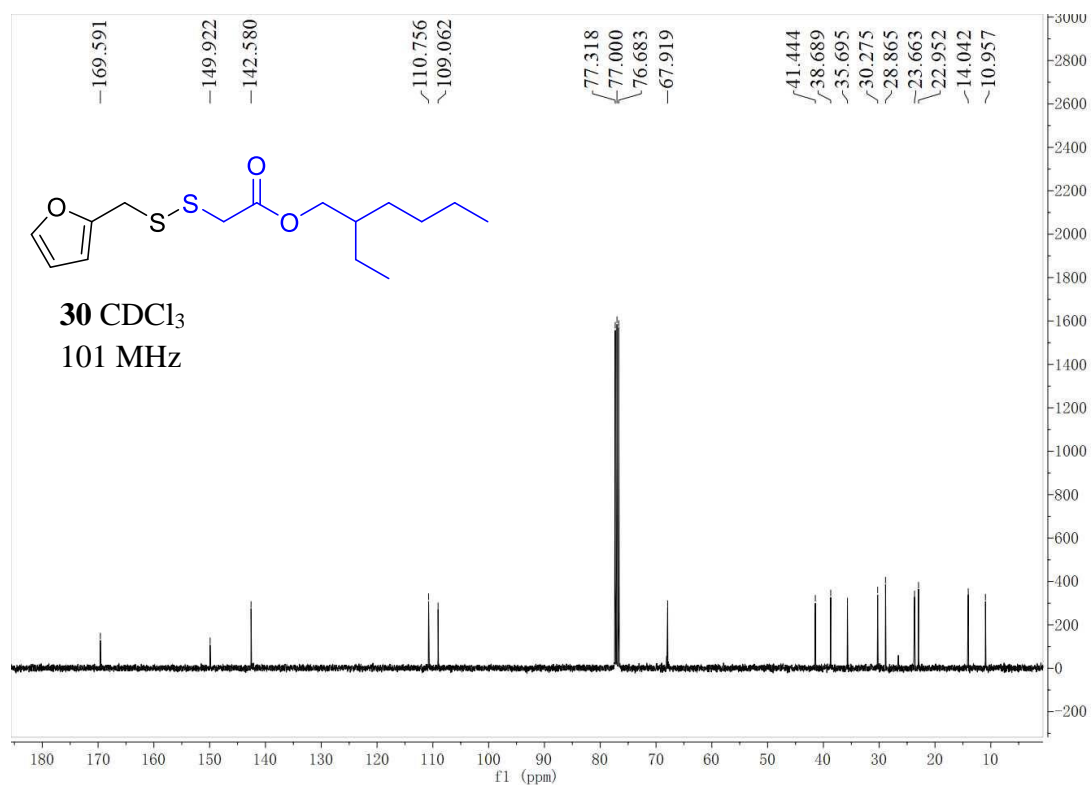

# Supporting Information

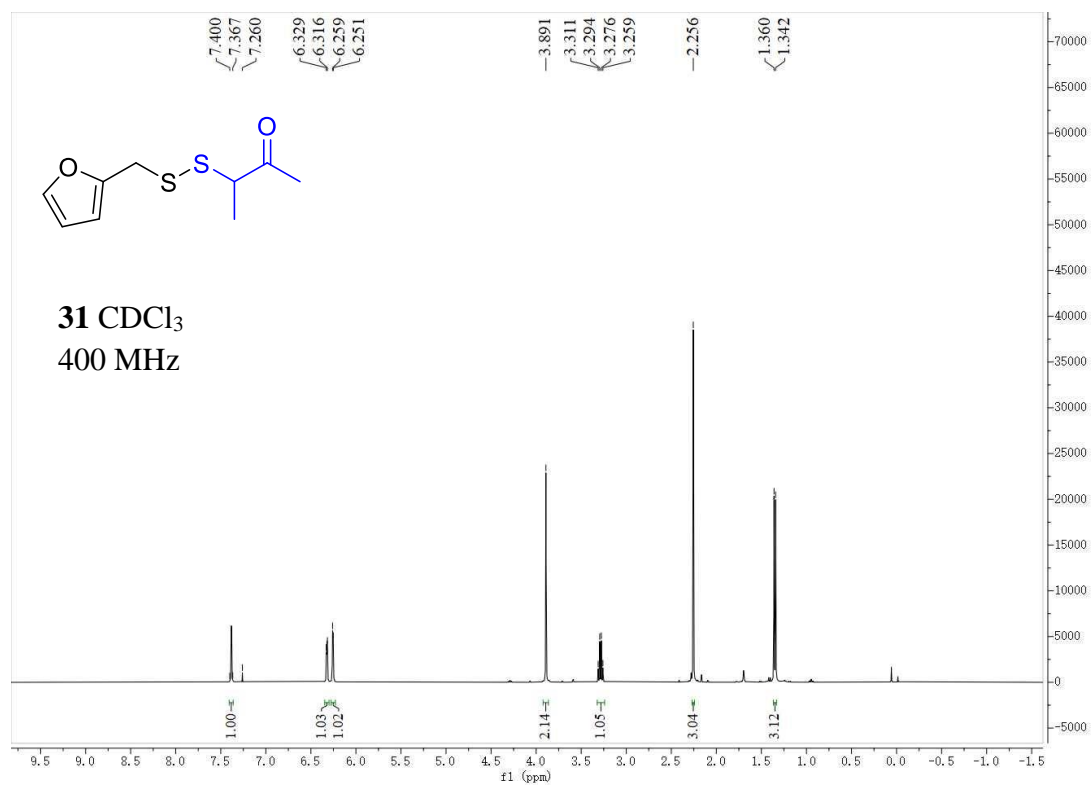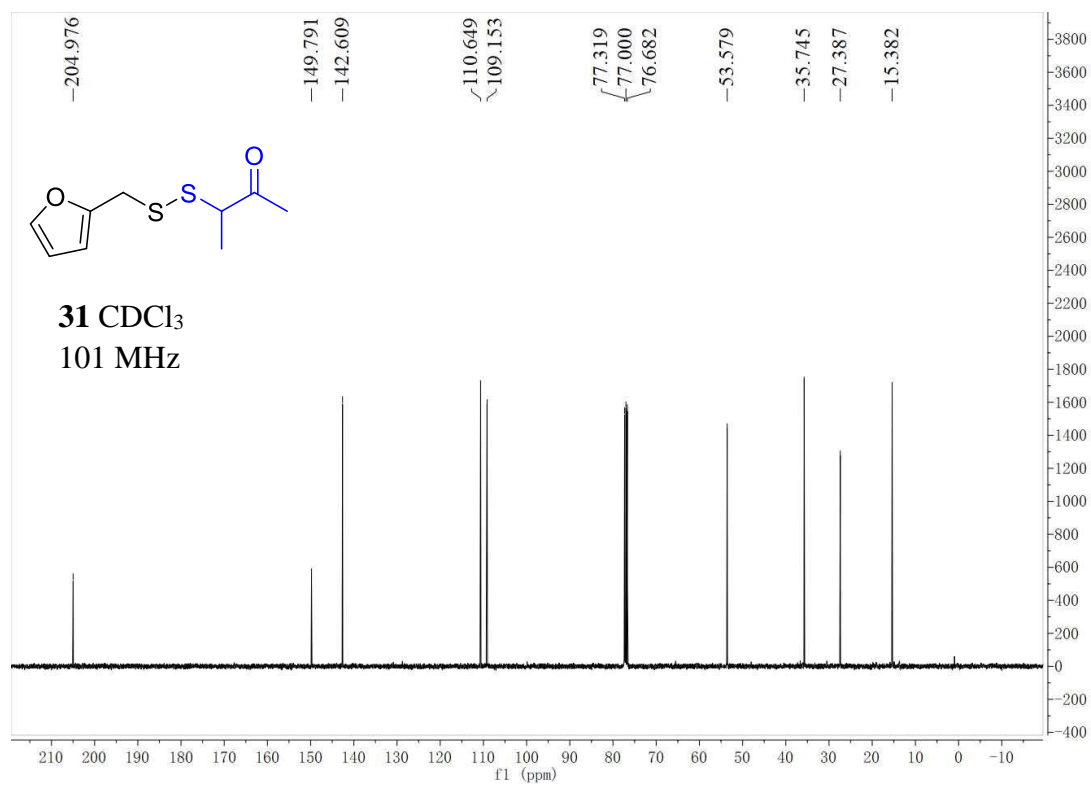

# Supporting Information

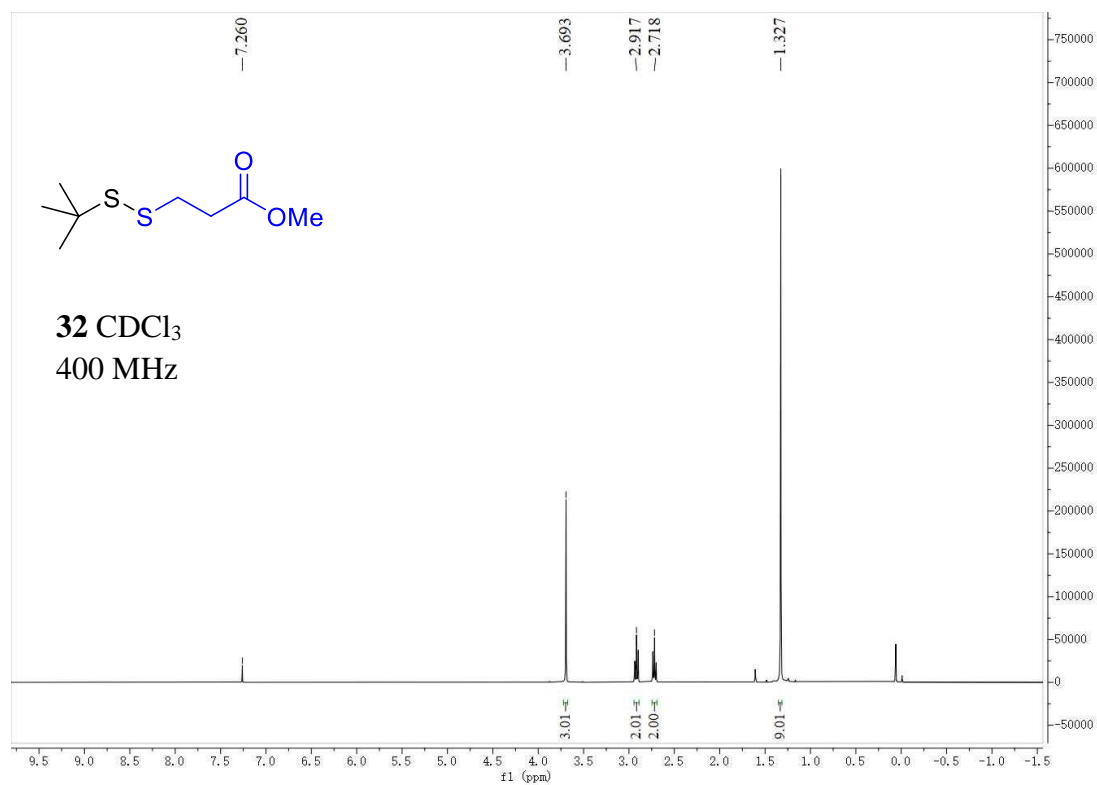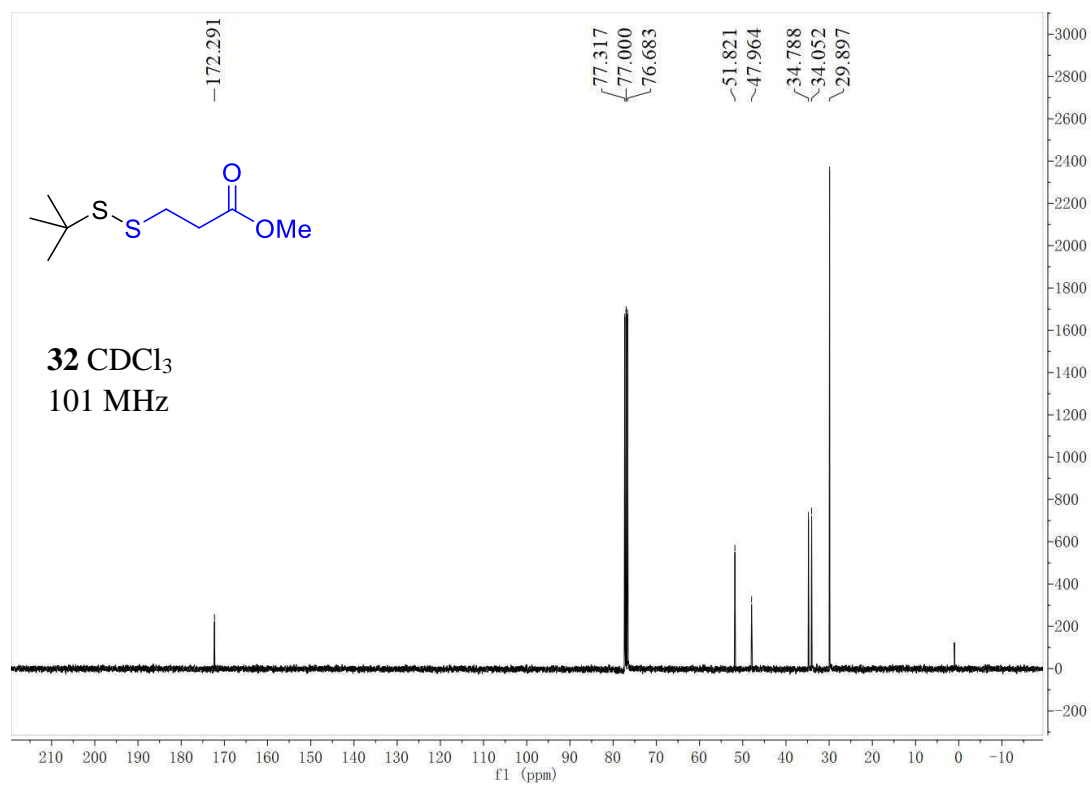

# Supporting Information

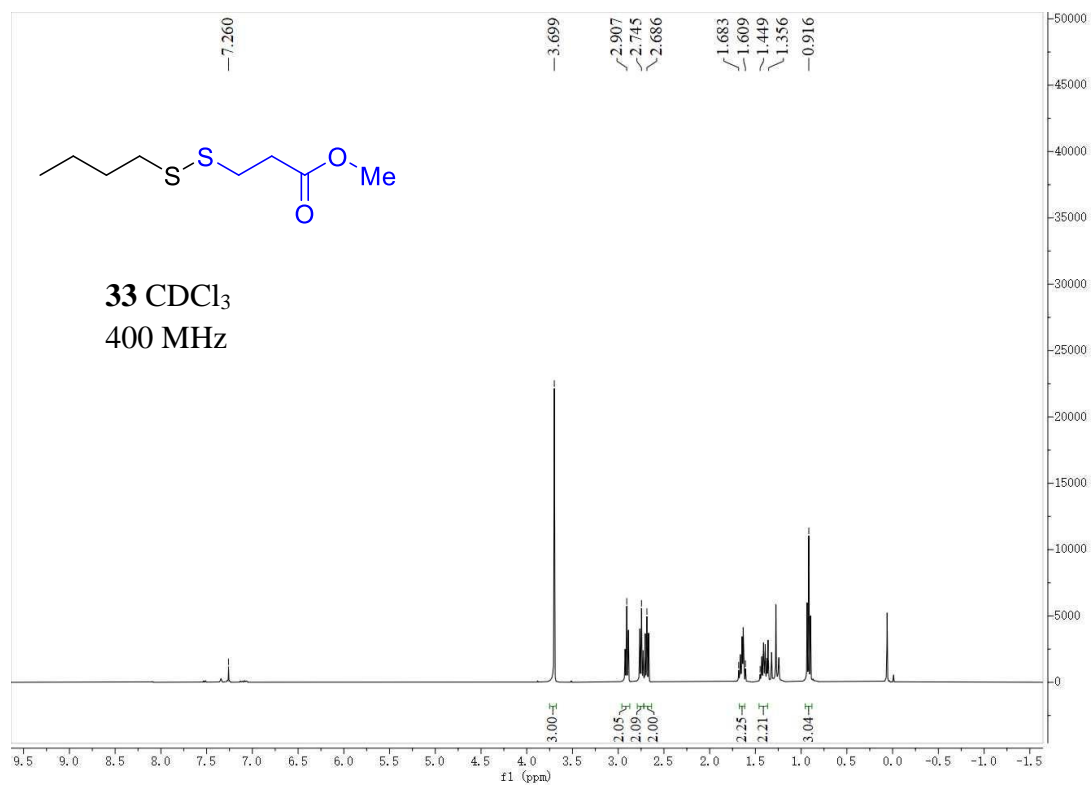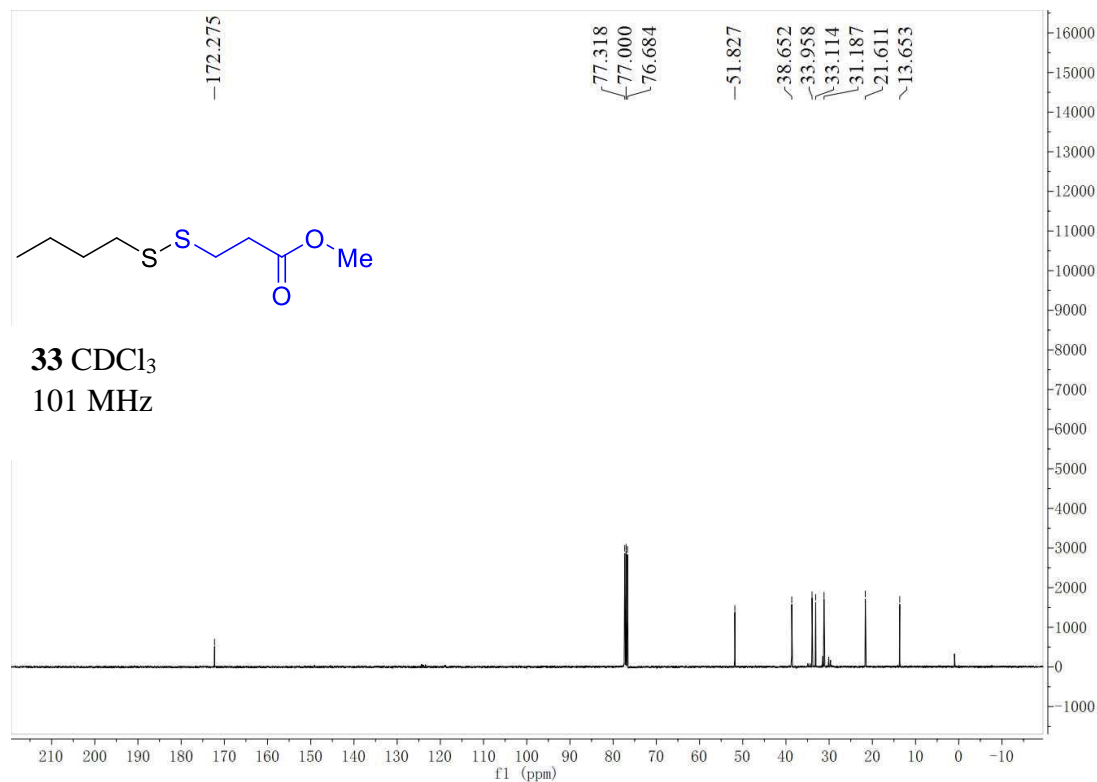

# Supporting Information

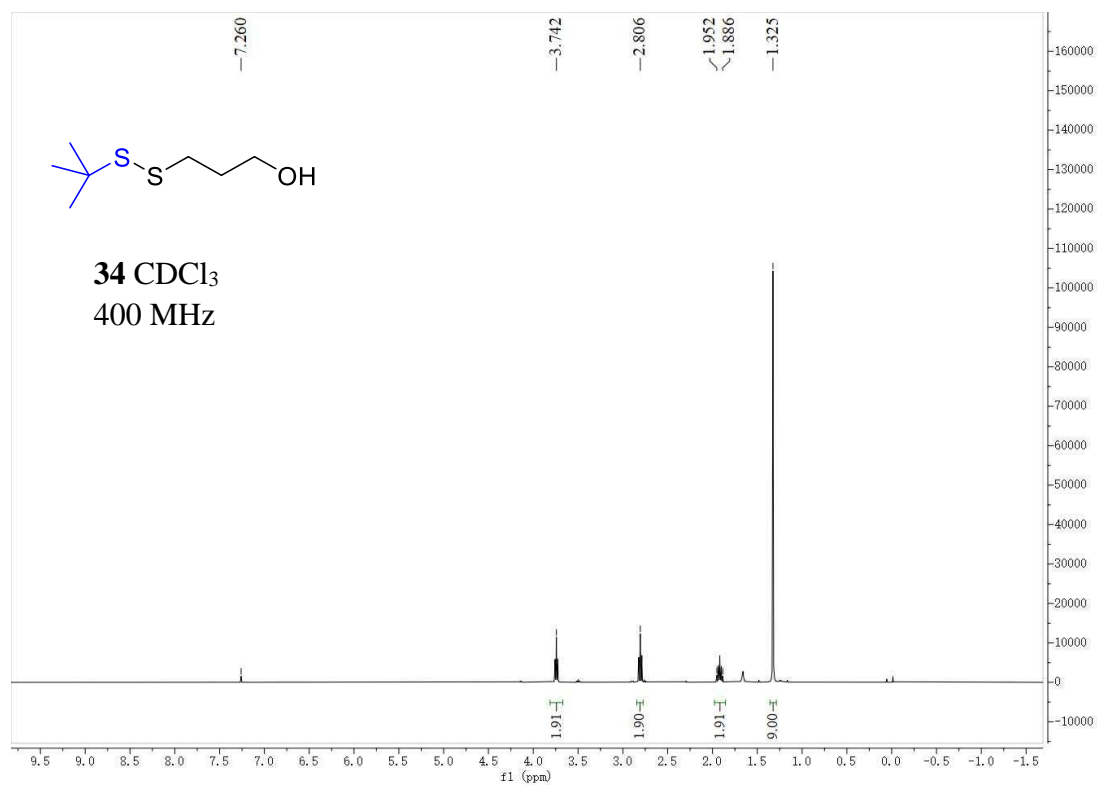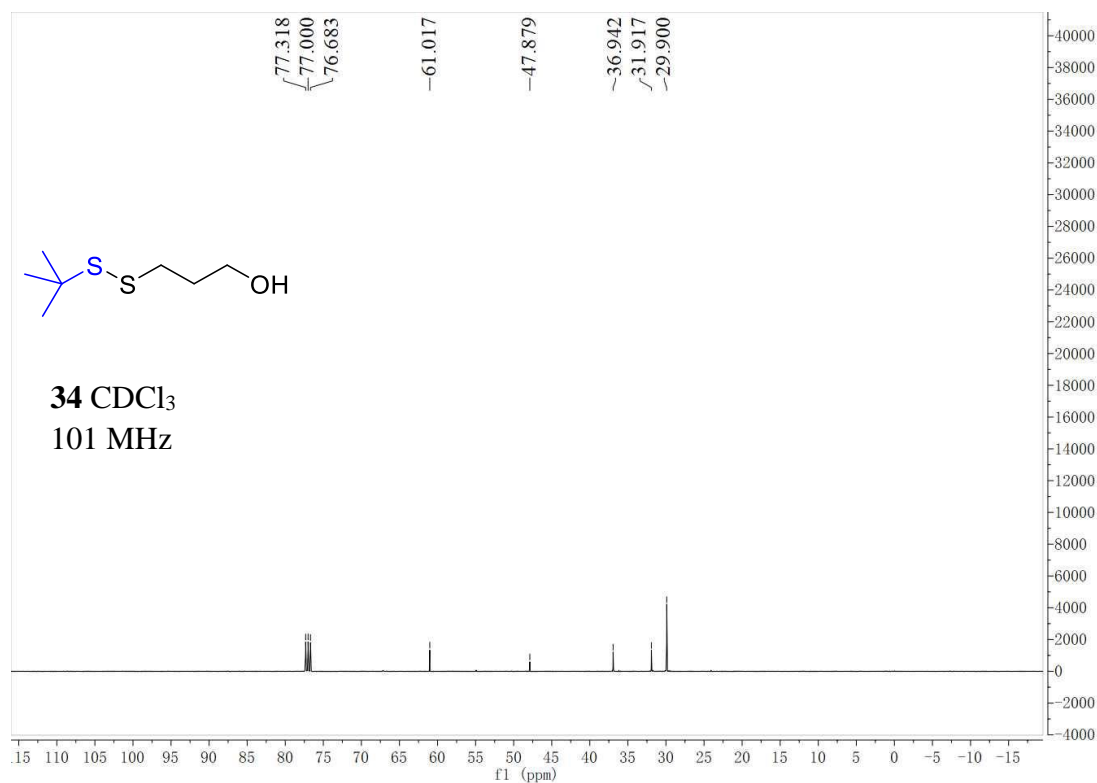

# Supporting Information

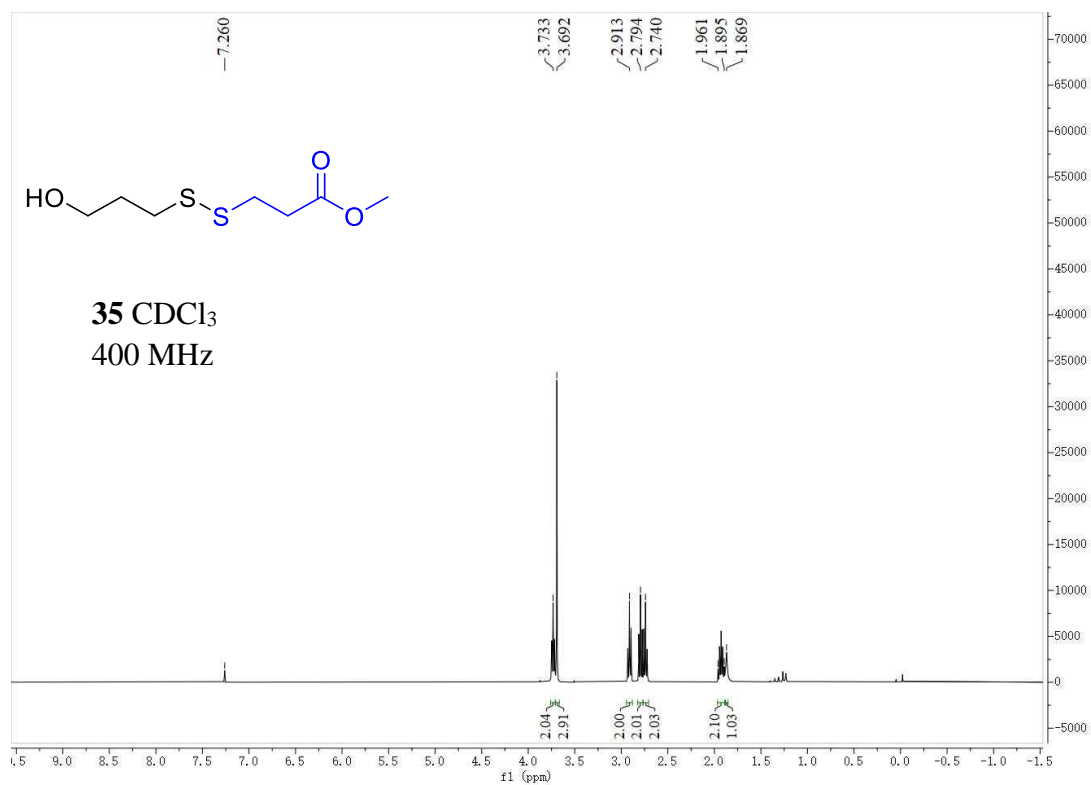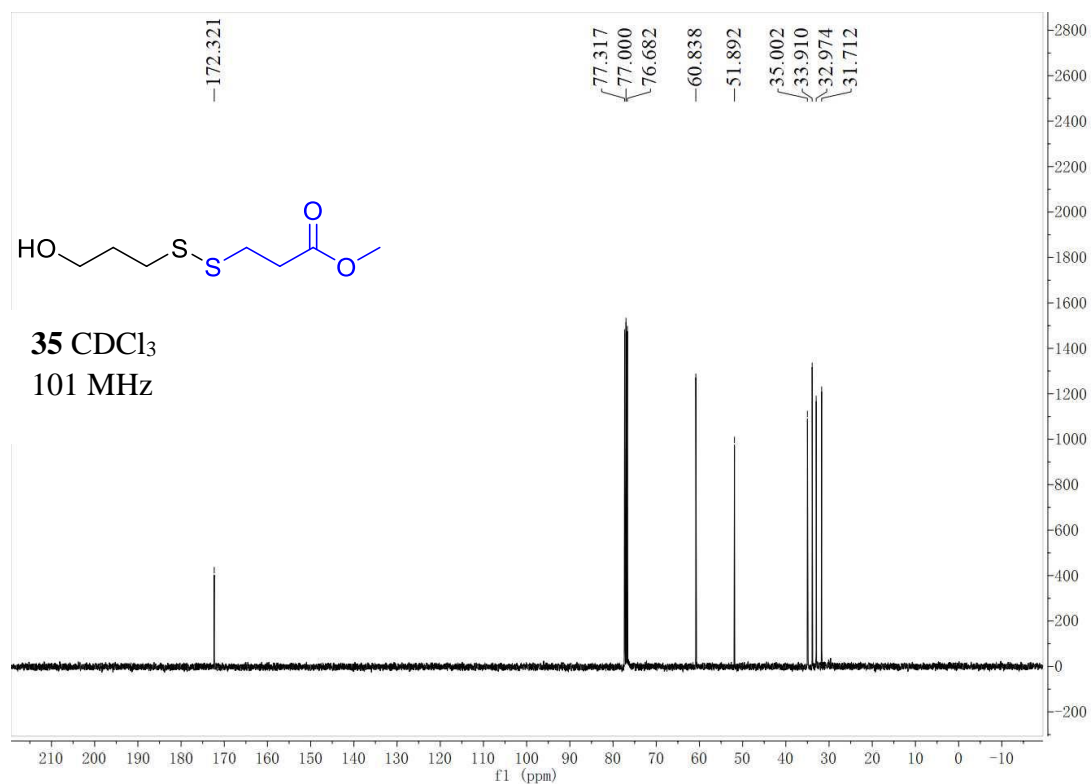

# Supporting Information

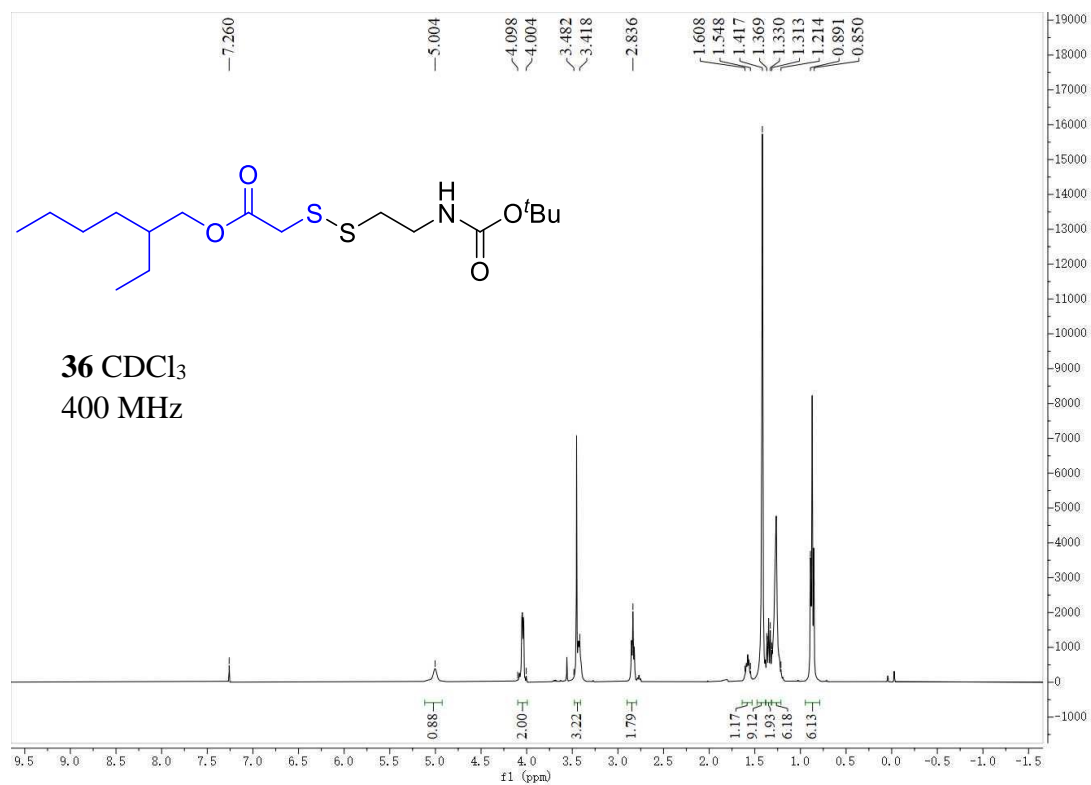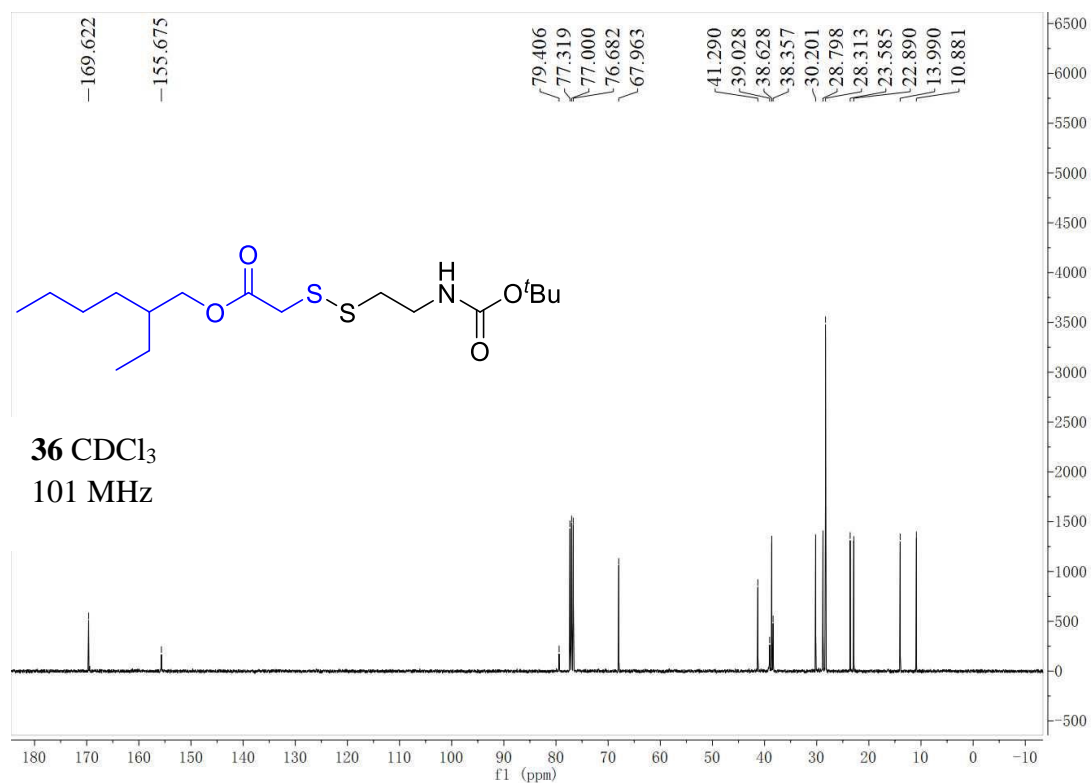



# Supporting Information

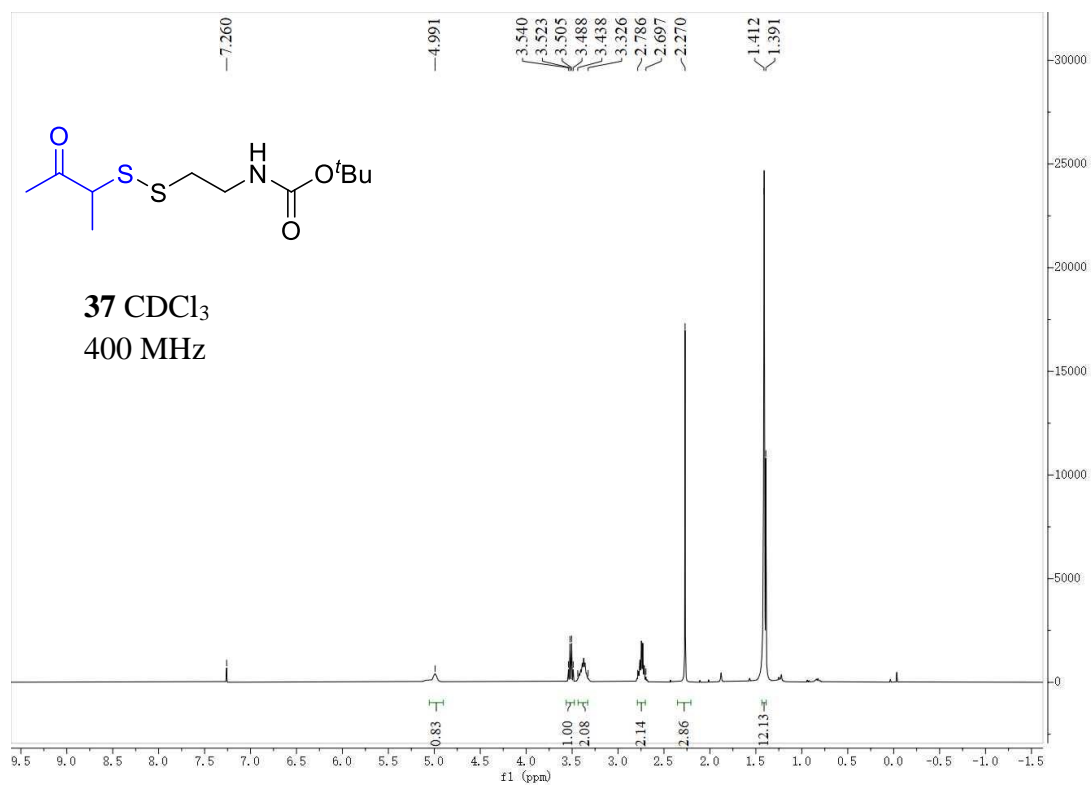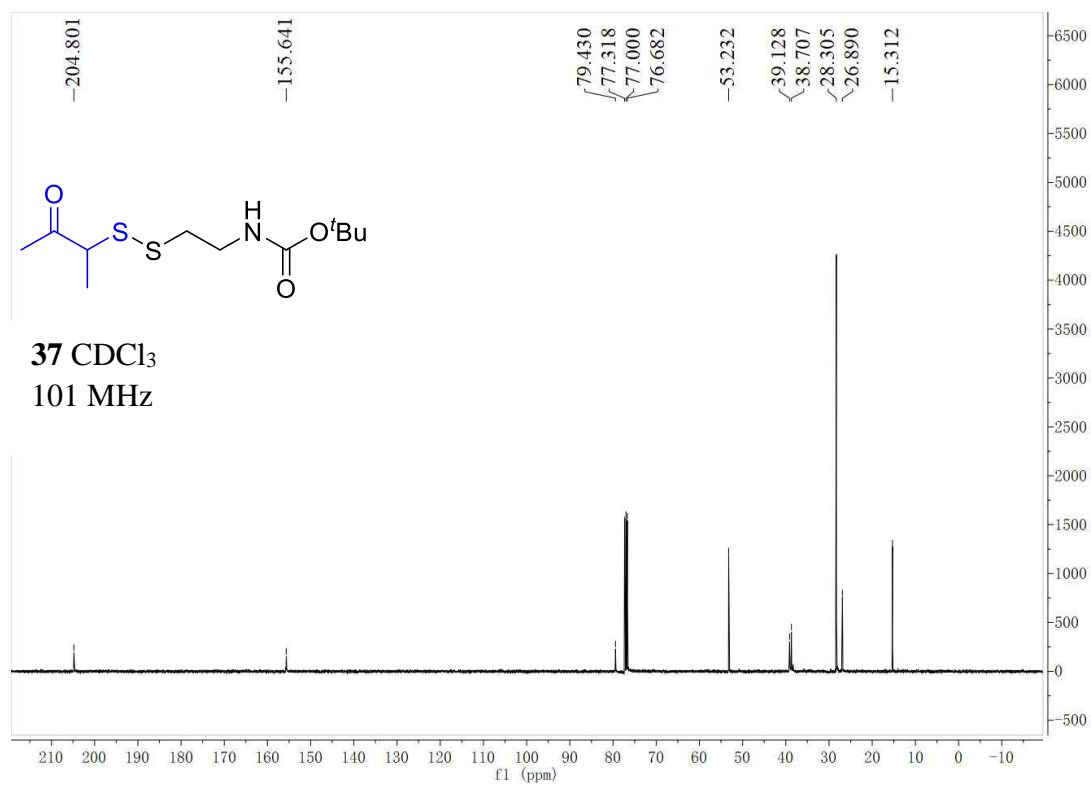

# Supporting Information

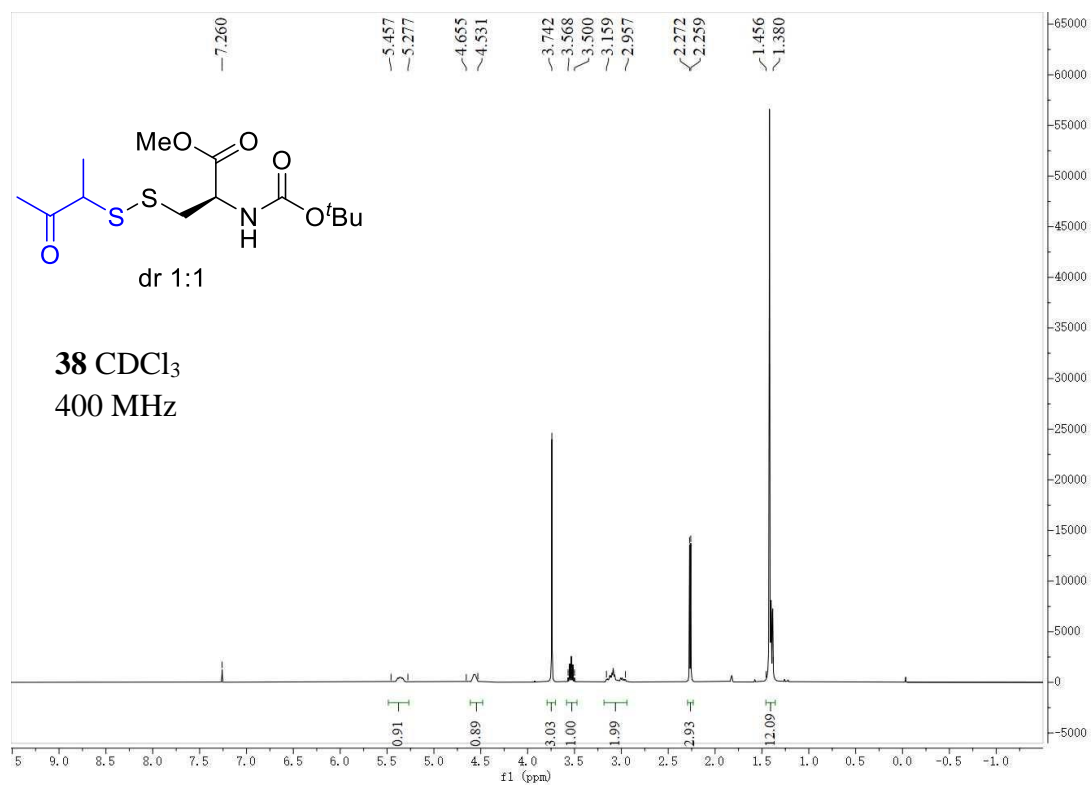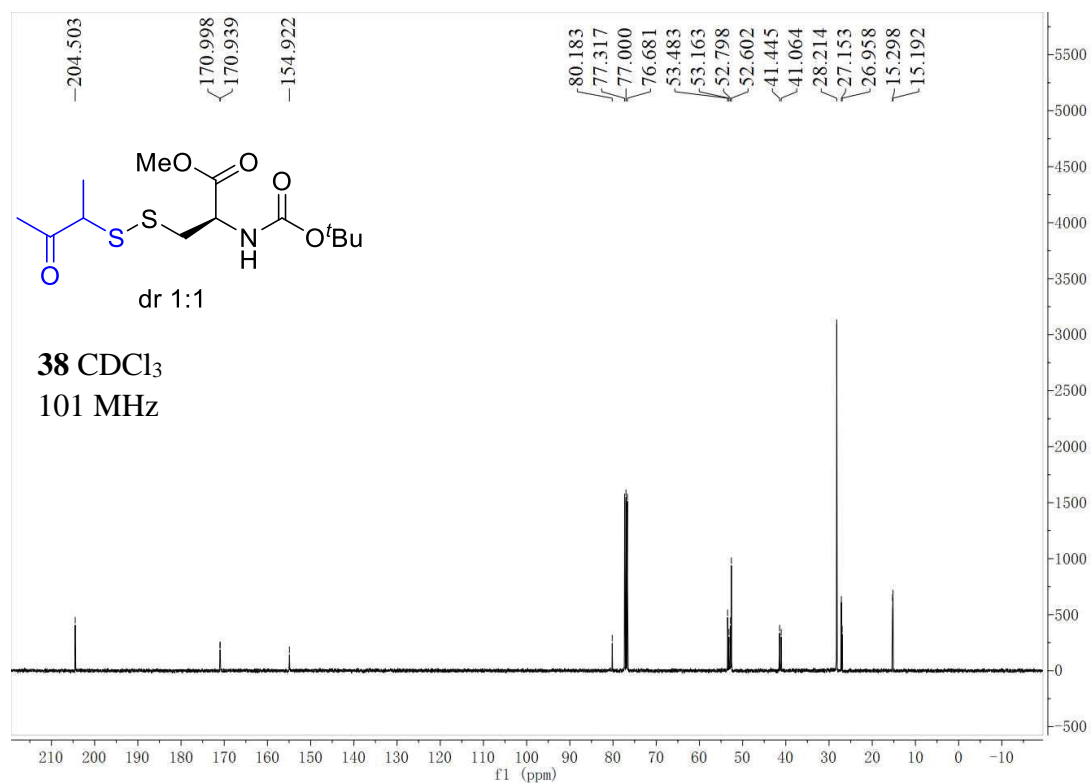

# Supporting Information

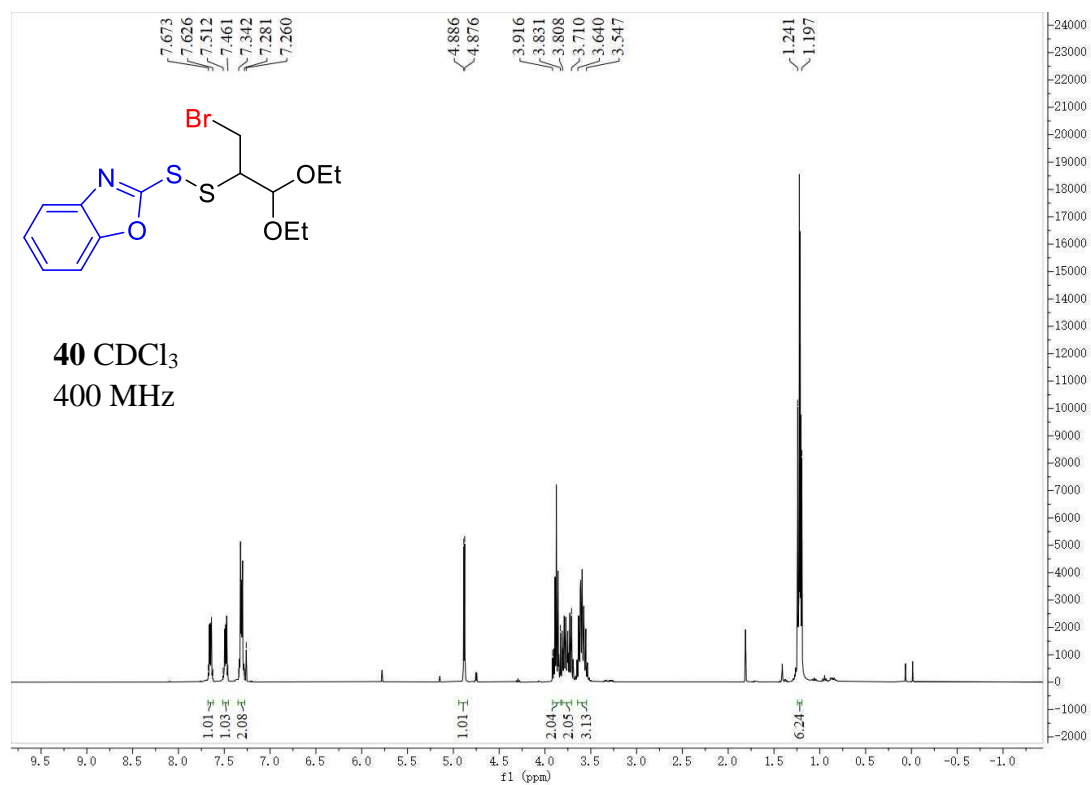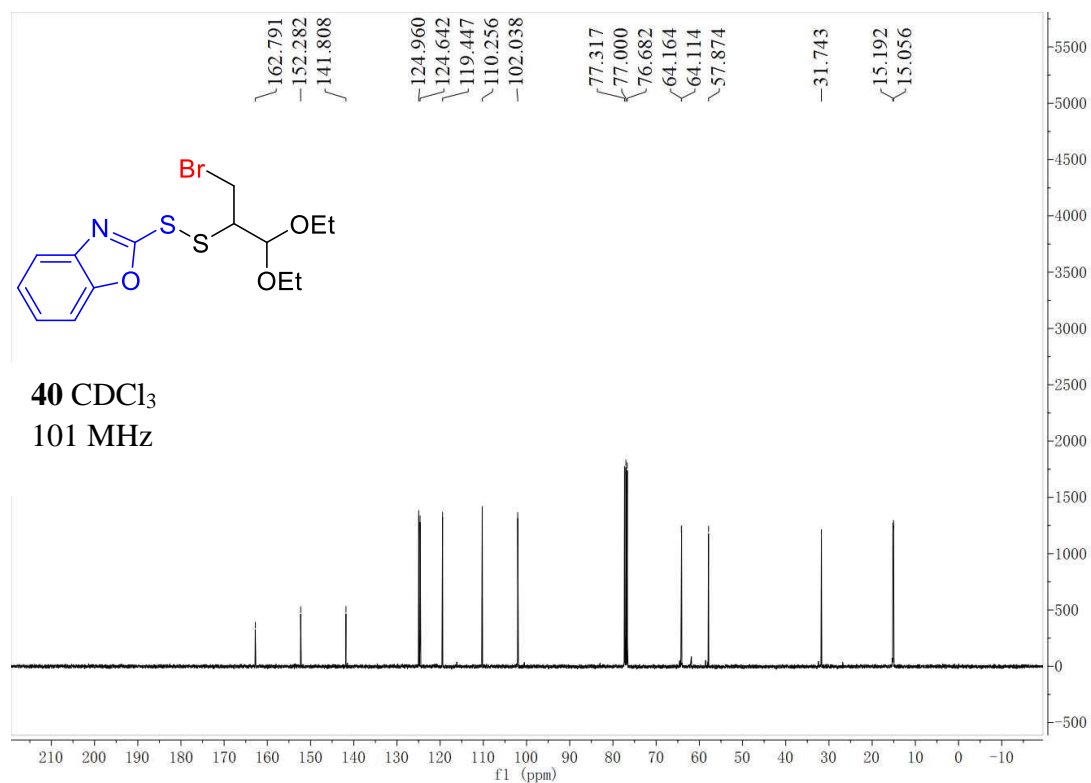

# Supporting Information

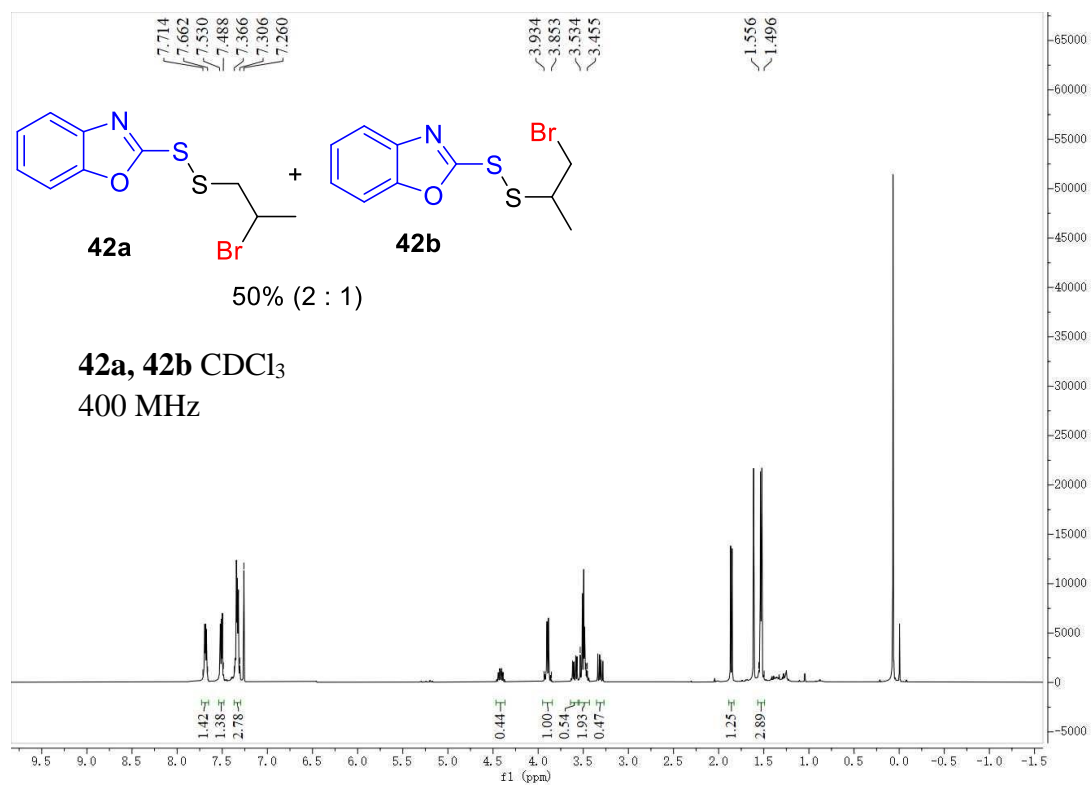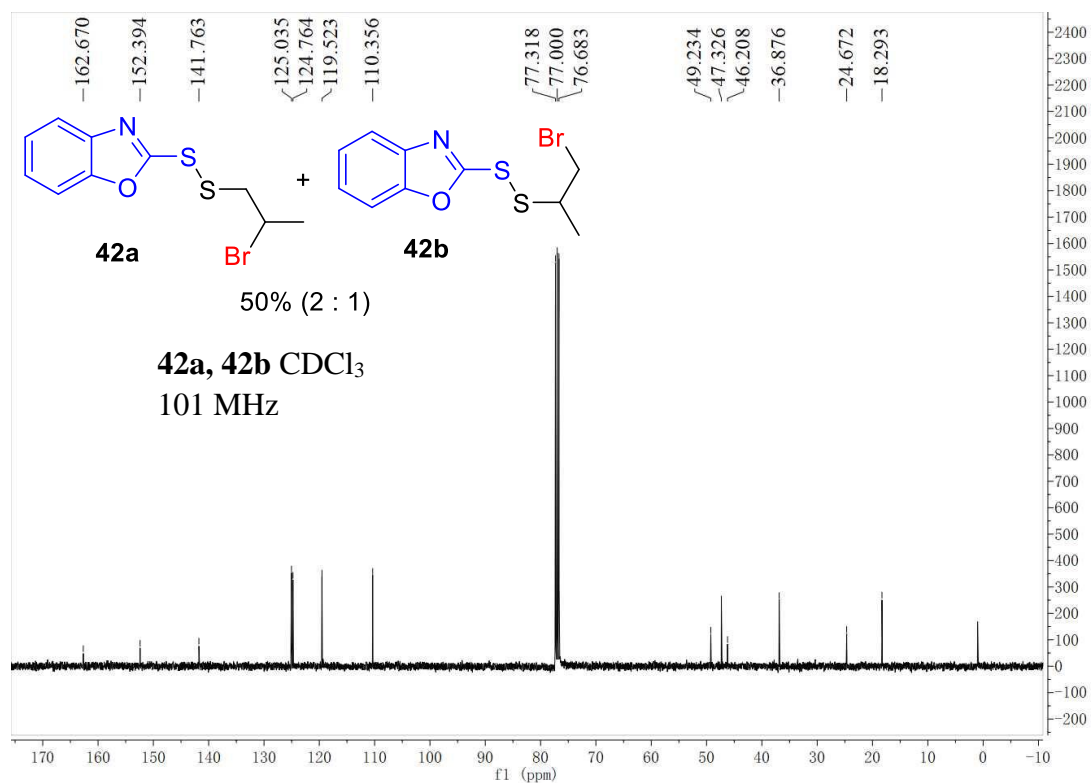

# Supporting Information

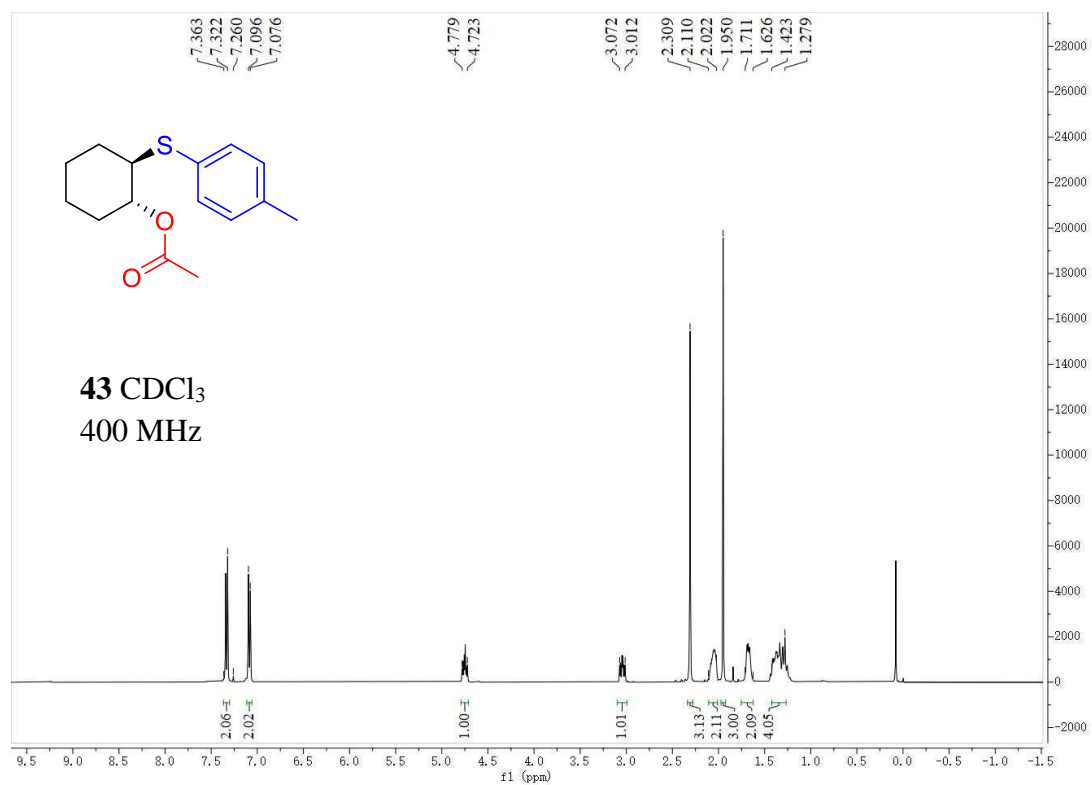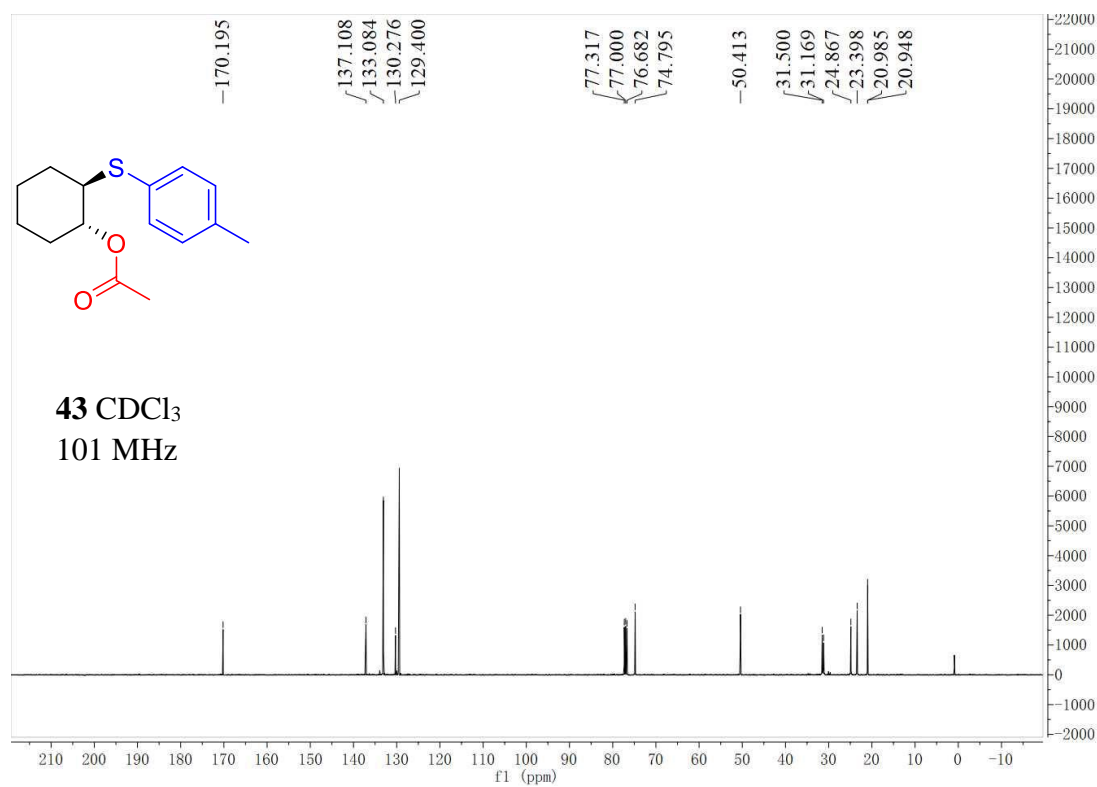

# Supporting Information

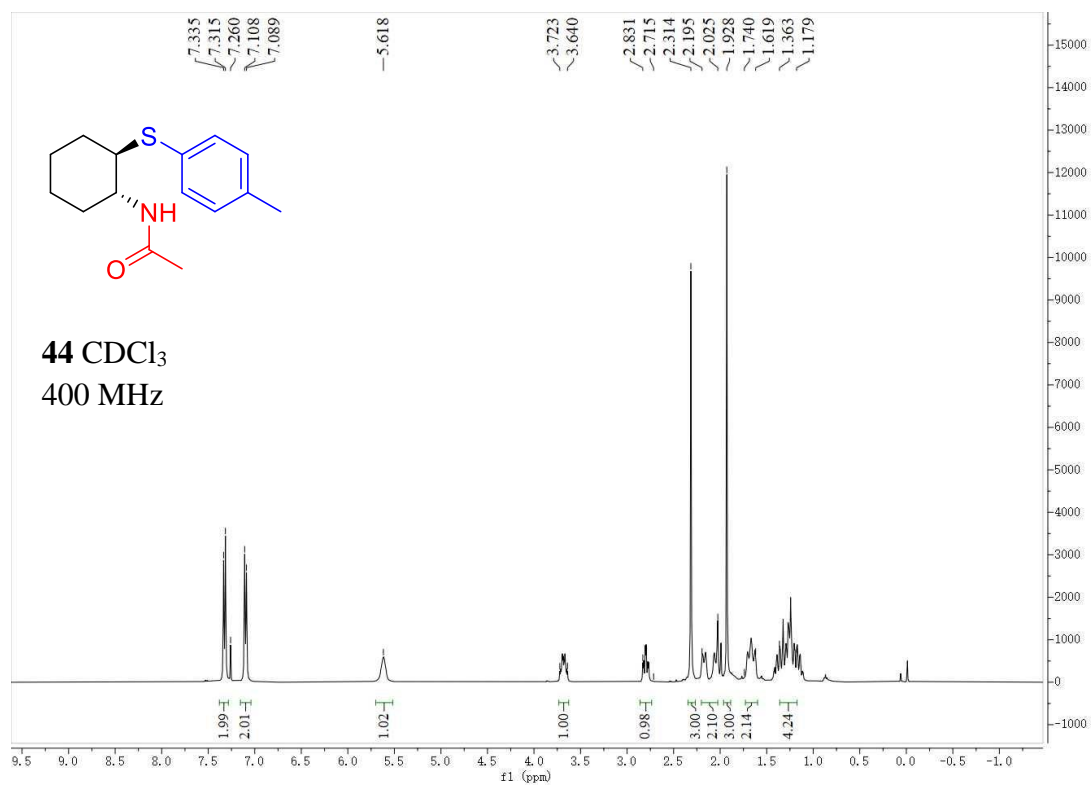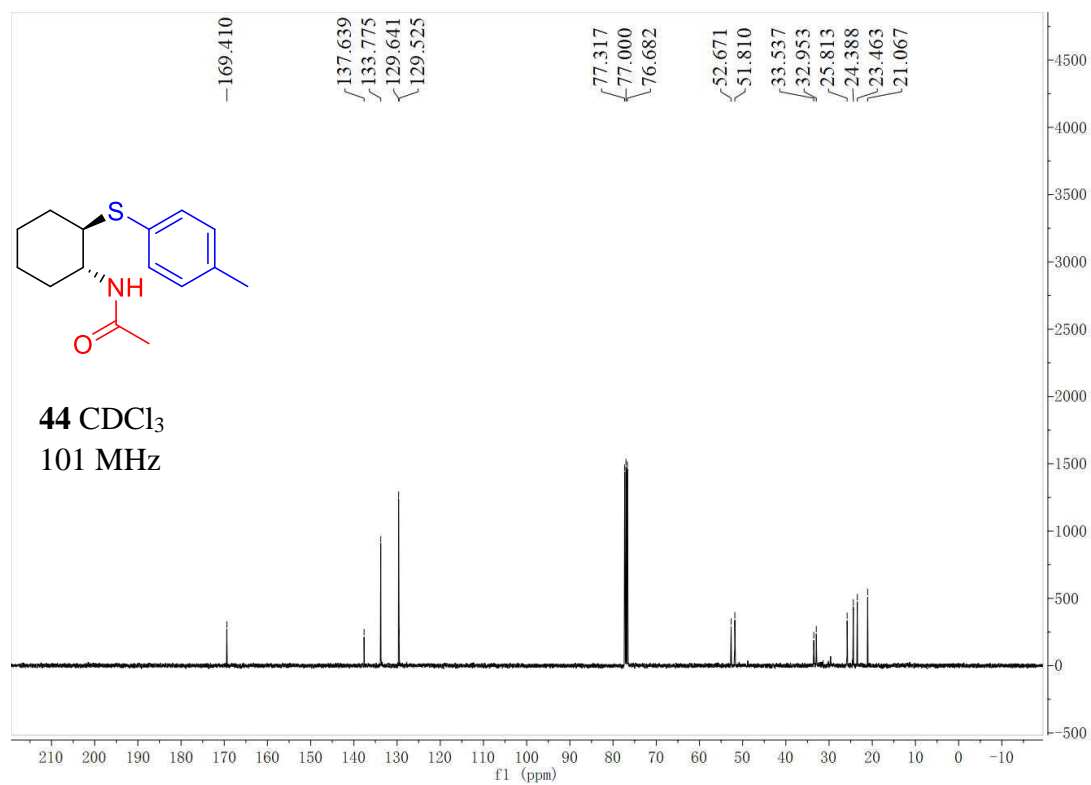

Supplement: d2ob02124b1.pdf [file d2ob02124b1.pdf]
